# Supplementary material
Source: PubMed Central journal article supplement (PMC6800824)

## Supporting Information

### Synthesis, characterization, and cycloaddition reactivity of a monocyclic aromatic 1,2,3,5-tetrazine

Zhi-Chen Wu and Dale L. Boger\*

Department of Chemistry and The Skaggs Institute for Chemical Biology, The Scripps Research Institute, 10550 N. Torrey Pines Road, La Jolla, CA 92037, USA

#### Table of Contents

|                                                                                      |              |
|--------------------------------------------------------------------------------------|--------------|
| I. General Methods                                                                   | Page S2      |
| II. Condition screening for the synthesis of <b>9</b> and <b>10</b>                  | Page S2–S4   |
| III. Synthesis of 4,6-diphenyl-1,2,3,5-tetrazine ( <b>2</b> )                        | Page S5–S9   |
| IV. Cycloaddition reactions with 4,6-diphenyl-1,2,3,5-tetrazine ( <b>2</b> )         | Page S9–S20  |
| V. Comparison of reactivity between <b>2</b> and <b>24</b>                           | Page S20–S21 |
| VI. LC-MS analysis of <b>2</b>                                                       | Page S21     |
| VII. Decomposition kinetics of <b>2</b>                                              | Page S22     |
| VIII. Kinetic study of the reaction between <b>2</b> and <b>11k</b>                  | Page S23     |
| IX. <sup>15</sup> N labeling experiments                                             | Page S24–S25 |
| X. X-ray crystal data and structure refinement for <b>8</b> , <b>10</b> and <b>2</b> | Page S26–S28 |
| XI. Differential scanning calorimetry characterization of <b>8</b> and <b>2</b>      | Page S29     |
| XII. References                                                                      | Page S30     |
| XIII. Spectra                                                                        | Page S30–S90 |

## I. General Methods

**General Methods.** All reagents and solvents were used as supplied without further purification unless otherwise noted. All cycloaddition reactions were performed in anhydrous solvents unless otherwise noted.  $\text{CHCl}_3$  was pre-treated with alumina for at least 24 h prior to use. Amidines were purchased as their hydrochloride salts and free-based by treatment with 2 M KOH (aq). Enamines and ynamines were prepared as reported in the literature.<sup>1</sup> Preparative TLC (PTLC) and column chromatography were conducted using Millipore  $\text{SiO}_2$  60 F<sub>254</sub> PTLC (0.5 mm) and Zeochem ZEOprep 60 ECO  $\text{SiO}_2$  (40–63  $\mu\text{m}$ ), respectively. Analytical TLC was conducted using Millipore  $\text{SiO}_2$  60 F<sub>254</sub> TLC (0.250 mm) plates.  $^1\text{H}$  and  $^{13}\text{C}$  NMR spectra were obtained using a Bruker Avance III HD 600 MHz spectrometer equipped with either a 5 mm QCI or 5 mm CPDCH probe or a Bruker Avance III 500 MHz spectrometer equipped with a 5 mm BBFO probe. UV-Vis spectroscopy was performed on a Cary 3E spectrophotometer. Cyclic voltammetry was measured by using an IKA ElectroSyn 2.0 package. IR spectra were obtained using a Thermo Nicolet 380 FT-IR with a SmartOrbit Diamond ATR accessory. Mass spectrometry analysis was performed by direct sample injection on an Agilent G1969A ESI-TOF mass spectrometer. The single crystal X-ray diffraction studies were carried out on a Bruker Kappa APEX-II CCD diffractometer equipped with Mo  $K\alpha$  radiation ( $\lambda = 0.71073$ ). Semiempirical computational studies (AM1, MNDO) were conducted with Gaussian09.<sup>S2</sup> Melting points (mp) are uncorrected.

## II. Condition screening for the synthesis of 9 and 10

**Table S1. Condition screening for the synthesis of 9.**

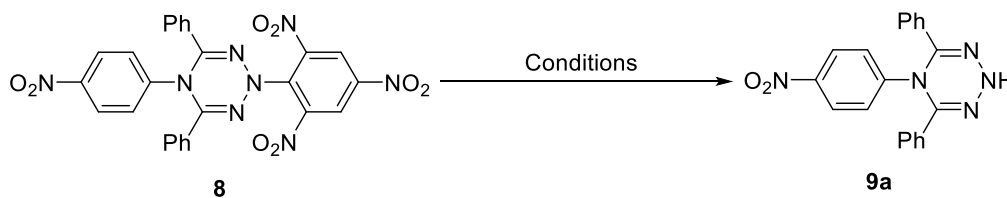

| Entry | Conditions                                                                                                       | Yield         |
|-------|------------------------------------------------------------------------------------------------------------------|---------------|
| 1     | KOH (5 equiv), PhSH (5 equiv), DMF, 25 °C, 2 h                                                                   | Decomposition |
| 2     | NaOMe (5 equiv), DMF, 25 °C, 18 h                                                                                | N. R.         |
| 3     | PhSH (5 equiv), DMF, 25 °C, 40 min                                                                               | N. R.         |
| 4     | PhSH (5 equiv), DMF, 60 °C, 15 h                                                                                 | N. R.         |
| 5     | $\text{K}_2\text{CO}_3$ (5 equiv), PhSH (5 equiv), DMF, 25 °C, 2 h                                               | Decomposition |
| 6     | $\text{KHCO}_3$ (5 equiv), PhSH (5 equiv), DMF, 25 °C, 2 h                                                       | Trace         |
| 7     | <b><math>\text{KHCO}_3</math> (5 equiv), <i>p</i>-MeOC<sub>6</sub>H<sub>4</sub>SH (5 equiv), DMF, 25 °C, 2 h</b> | <b>25%</b>    |

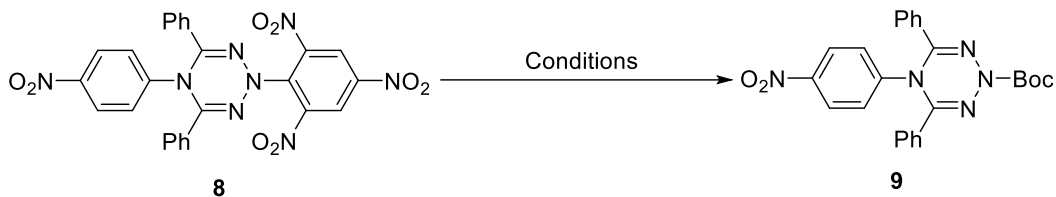

| Entry | Conditions                                                                                                                                                                                              | Yield                     |
|-------|---------------------------------------------------------------------------------------------------------------------------------------------------------------------------------------------------------|---------------------------|
| 1     | Et <sub>3</sub> N (2.5 equiv), <i>p</i> -MeOC <sub>6</sub> H <sub>4</sub> SH (2.5 equiv), CH <sub>3</sub> CN, 25 °C, 1.5 h; then Et <sub>3</sub> N (5 equiv), Boc <sub>2</sub> O (5 equiv), 25 °C, 10 h | N. R., then Decomposition |
| 2     | Et <sub>3</sub> N (2.5 equiv), <i>p</i> -MeOC <sub>6</sub> H <sub>4</sub> SH (2.5 equiv), DMF, 25 °C, 1.5 h; then Et <sub>3</sub> N (5 equiv), Boc <sub>2</sub> O (5 equiv), 25 °C, 10 h                | N. R., then Decomposition |
| 3     | NaH (10 equiv), <i>p</i> -MeOC <sub>6</sub> H <sub>4</sub> SH (2.5 equiv), DMF, 25 °C, 1.5 h; then Boc <sub>2</sub> O (5 equiv), 40 min                                                                 | N. R., then Decomposition |
| 4     | Et <sub>3</sub> N (2.5 equiv), <i>p</i> -MeOC <sub>6</sub> H <sub>4</sub> SH (2.5 equiv), DMF, 25 °C, 1 h; then NaH (30 equiv), Boc <sub>2</sub> O (30 equiv), 25 °C, 1 h                               | Trace                     |
| 5     | <b>Et<sub>3</sub>N (2.5 equiv), <i>p</i>-MeOC<sub>6</sub>H<sub>4</sub>SH (2.5 equiv), DMF, 25 °C, 1 h; then NaH (30 equiv), Boc<sub>2</sub>O (30 equiv), -50 °C, 3 h</b>                                | <b>69-70%</b>             |
| 6     | <b>Et<sub>3</sub>N (2.5 equiv), <i>p</i>-MeOC<sub>6</sub>H<sub>4</sub>SH (2.5 equiv), DMF, 25 °C, 1 h; then NaH (10 equiv), Boc<sub>2</sub>O (10 equiv), -50 °C, 4 h</b>                                | <b>58-60%</b>             |

**Table S2. Condition screening for the synthesis of 10.**

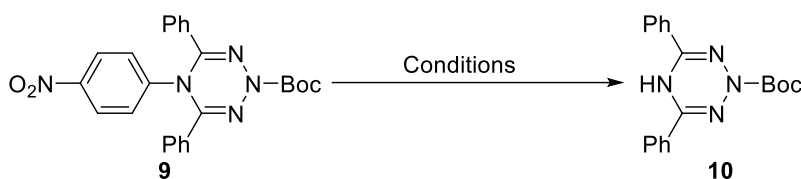

| Entry     | Nucleophile (5 equiv)                         | Base                               | Solvent            | Temp         | Time         | Yield         |
|-----------|-----------------------------------------------|------------------------------------|--------------------|--------------|--------------|---------------|
| 1         | <i>p</i> -MeOC <sub>6</sub> H <sub>4</sub> SH | K <sub>2</sub> CO <sub>3</sub>     | DMF                | 120 °C       | 1 h          | Decomposition |
| 2         | <i>p</i> -MeOC <sub>6</sub> H <sub>4</sub> SH | Et <sub>3</sub> N                  | DMF                | 80 °C        | 16 h         | Decomposition |
| 3         | <i>p</i> -MeOC <sub>6</sub> H <sub>4</sub> SH | DBU                                | DMF                | 80 °C        | 6 h          | N. R.         |
| <b>4</b>  | <b>BnSH</b>                                   | <b>DBU</b>                         | <b>DMF</b>         | <b>50 °C</b> | <b>0.5 h</b> | <b>26-29%</b> |
| 5         | BnSH                                          | DBU                                | DMF                | 25 °C        | 6 h          | 21%           |
| 6         | BnSH                                          | DBU                                | DMSO               | 25 °C        | 6 h          | 20%           |
| 7         | BnSH                                          | DBU                                | CH <sub>3</sub> CN | 25 °C        | 9 h          | 21%           |
| 8         | BnSH                                          | DBU                                | Acetone            | 25 °C        | 9 h          | 12%           |
| 9         | EtSH                                          | DBU                                | DMF                | 25 °C        | 1 h          | 17%           |
| 10        | EtSH                                          | DBU                                | DMF                | 25 °C        | 6 h          | 26-28%        |
| 11        | EtSH (20 equiv)                               | DBU                                | DMF                | 25 °C        | 3 h          | 23%           |
| 12        | Ph <sub>3</sub> CSH                           | DBU                                | DMF                | 25 °C        | 14 h         | N. R.         |
| 13        | NaHS                                          | DBU                                | DMF                | 25 °C        | 48 h         | N. R.         |
| 14        | <i>t</i> -BuSH                                | DBU                                | DMF                | 25 °C        | 26 h         | N. R.         |
| 15        | KSCN                                          | DBU                                | DMF                | 25 °C        | 26 h         | N. R.         |
| 16        | EtSH                                          | Et <sub>3</sub> N                  | DMF                | 25 °C        | 24 h         | N. R.         |
| <b>17</b> | <b>EtSH</b>                                   | <b>K<sub>2</sub>CO<sub>3</sub></b> | <b>DMF</b>         | <b>25 °C</b> | <b>6 h</b>   | <b>29%</b>    |
| 18        | HSCH <sub>2</sub> COOH                        | K <sub>2</sub> CO <sub>3</sub>     | DMF                | 25 °C        | 24 h         | N. R.         |
| 19        | HSCH <sub>2</sub> COOH                        | DBU                                | DMF                | 25 °C        | 22 h         | 17%           |

### III. Synthesis of 4,6-diphenyl-1,2,3,5-tetrazine (2)

#### Multi-gram scale synthesis of 5

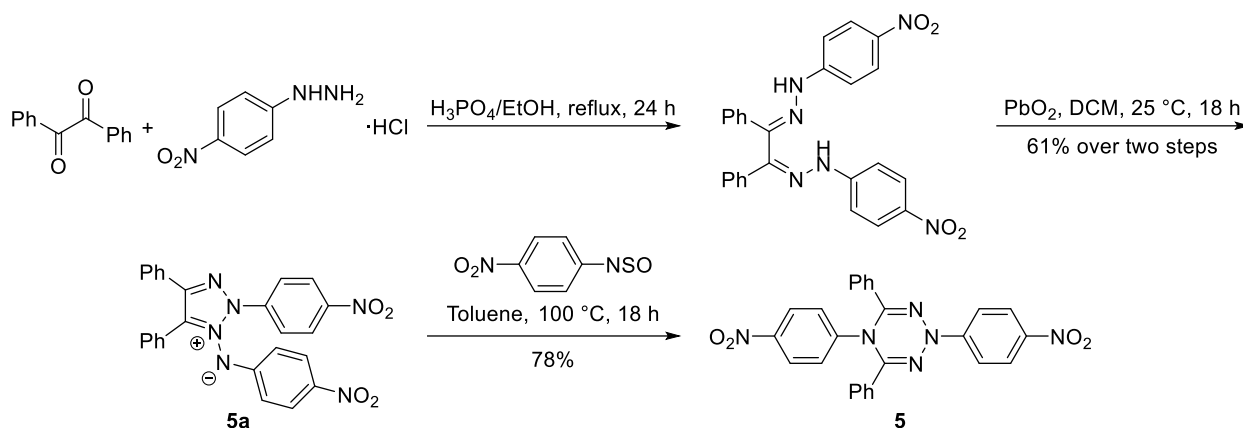

The synthesis of **5** was reported by Butler et al.<sup>S3</sup> and herein we describe a scaled synthesis from commercially available material.

Benzil (8.40 g, 40 mmol, 1.0 equiv) and *p*-nitrophenylhydrazine hydrochloride (22.80 g, 120 mmol, 3.0 equiv) were added to a 1 L round-bottom flask, and H<sub>3</sub>PO<sub>4</sub>/EtOH (400 mL, V/V = 6:4) was added, giving a suspension. The mixture was warmed at reflux at 120 °C for 24 h. The orange mixture was cooled to room temperature, diluted with 500 mL H<sub>2</sub>O, and filtered through a Büchner funnel. The orange solid collected was washed with H<sub>2</sub>O (500 mL × 2), air dried, and placed in a 1 L round-bottom flask. CH<sub>2</sub>Cl<sub>2</sub> (400 mL) and PbO<sub>2</sub> (14.40 g, 60 mmol, 1.5 equiv) were added. The mixture was stirred at 25 °C for 18 h. The mixture was filtered through Celite and concentrated. The residue was purified by column chromatography (SiO<sub>2</sub>, CH<sub>2</sub>Cl<sub>2</sub> then EtOAc) to provide **5a** (11.73 g, 61%) as a red solid.

*p*-Nitroaniline (6.91 g, 50 mmol, 2.0 equiv) and anhydrous toluene (25 mL) were added to an oven-dried 250 mL round-bottom flask, and SOCl<sub>2</sub> (11.9 g, 7.26 mL, 100 mmol, 4.0 equiv) was added to the mixture under Ar. The mixture was warmed at 80 °C for 6 h. The mixture was cooled to room temperature and the solvent was removed to provide a yellow-green solid. The solid was placed in a 200 mL oven-dried bomb flask, followed by the addition of **5a** (11.47 g, 24 mmol, 1.0 equiv) and anhydrous toluene (150 mL). The flask was sealed, and the mixture was warmed at 100 °C for 16 h. The mixture was cooled and solvent was removed. The residue was purified by column chromatography (SiO<sub>2</sub>, 50% CH<sub>2</sub>Cl<sub>2</sub>/hexanes) to provide **5** (8.95 g, 78%) as a yellow solid identical to material previously reported.<sup>S3</sup>

## 2-(4-Nitrophenyl)-4,6-diphenyl-2,5-dihydro-1,2,3,5-tetrazine (6).

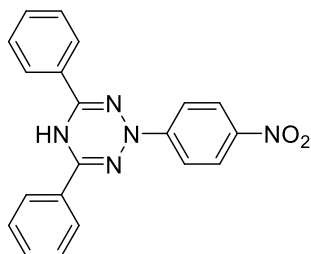

6

A solution of **5** (120 mg, 0.25 mmol, 1.0 equiv) in CH<sub>3</sub>CN (2.5 mL) was treated with KOH (70 mg, 1.25 mmol, 5 equiv) and PhSH (140 mg, 130  $\mu$ L, 1.25 mmol, 5 equiv). The mixture was warmed at 80 °C for 42 h before it was cooled to room temperature and quenched with the addition of 10 mL of saturated aqueous NH<sub>4</sub>Cl. The mixture was extracted with CH<sub>2</sub>Cl<sub>2</sub> (50 mL  $\times$  2) and the organic phase was dried over Na<sub>2</sub>SO<sub>4</sub>. The solvent was removed and the residue was purified by column chromatography (SiO<sub>2</sub>, 0–9% acetone/CH<sub>2</sub>Cl<sub>2</sub>) to provide **6** (44.0 mg, 49%) as a brown solid: mp 226–228 °C; <sup>1</sup>H NMR (600 MHz, DMSO-*d*<sub>6</sub>, 298K)  $\delta$  10.27 (s, 1H), 8.20 (d, 2H, *J* = 9.1 Hz), 8.03 (d, 4H, *J* = 7.3 Hz), 7.64–7.57 (m, 8H); <sup>13</sup>C NMR (151 MHz, DMSO-*d*<sub>6</sub>, 298K)  $\delta$  150.8, 149.2, 139.4, 131.7, 129.3, 128.7, 127.3, 125.3, 112.9; IR (film)  $\nu_{\text{max}}$  3667, 2984, 2890, 1591, 1479, 1393, 1321, 1249, 1061, 894 cm<sup>-1</sup>; HRMS ESI-TOF *m/z* 357.1218 (M<sup>+</sup>, C<sub>20</sub>H<sub>15</sub>N<sub>5</sub>O<sub>2</sub><sup>+</sup> requires 357.1226).

## 4,4'-(4,6-Diphenyl-1,2,3,5-tetrazine-2,5-diyl)dianiline (7).

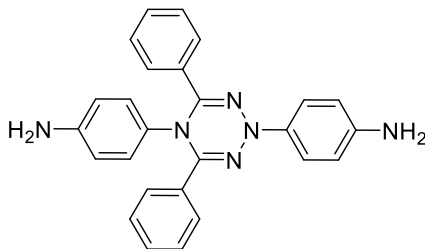

7

A suspension of **5** (244 mg, 0.05 mmol, 1.0 equiv) and 10% Pd/C (12 mg) in EtOAc (1 mL) was stirred at 25 °C under a H<sub>2</sub> atmosphere for 16 h. The mixture was filtered, and the solvent was removed to provide **7** (18.8 mg, 90%) as an orange solid: mp 143–145 °C; <sup>1</sup>H NMR (600 MHz, CDCl<sub>3</sub>, 298K)  $\delta$  8.06–8.05 (m, 4H), 7.55 (d, 2H, *J* = 8.8 Hz), 7.43–7.38 (m, 6H), 6.93 (d, 2H, *J* = 8.8 Hz), 6.73 (d, 2H, *J* = 8.8 Hz), 6.44 (d, 2H, *J* = 8.8 Hz), 3.49 (br s, 4H); <sup>13</sup>C NMR (151 MHz, CDCl<sub>3</sub>, 298K)  $\delta$  143.1, 143.0, 142.3, 140.3, 135.6, 133.4, 129.9, 128.7, 127.3, 123.5, 117.7, 116.0, 115.7; IR (film)  $\nu_{\text{max}}$  3434, 3357, 3204, 3038, 1618, 1506, 1317, 1285, 1245, 1052, 822, 728, 692 cm<sup>-1</sup>; HRMS ESI-TOF *m/z* 418.1901 (M<sup>+</sup>, C<sub>26</sub>H<sub>22</sub>N<sub>6</sub><sup>+</sup> requires 418.1906).

**5-(4-Nitrophenyl)-4,6-diphenyl-2-(2,4,6-trinitrophenyl)-2,5-dihydro-1,2,3,5-tetrazine (8).**

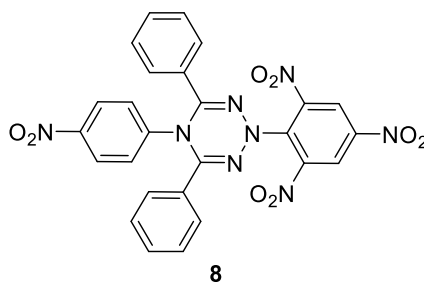

(<sup>n</sup>Bu<sub>4</sub>N)<sub>2</sub>Ce(NO<sub>3</sub>)<sub>6</sub> was prepared as reported.<sup>S4</sup>

(<sup>n</sup>Bu<sub>4</sub>N)<sub>2</sub>Ce(NO<sub>3</sub>)<sub>6</sub> (44.5 g, 44.5 mmol, 2.2 equiv) and TfOH (6.68 g, 4.0 mL, 44.5 mmol, 2.2 equiv) were sequentially added to a solution of **5** (10.64 g, 22.2 mmol, 1.0 equiv) in CH<sub>2</sub>Cl<sub>2</sub> (400 mL) in a 1 L round-bottom flask. The mixture was stirred at 25 °C for 5 h before Et<sub>3</sub>N (4.45 g, 44.5 mmol) was added to quench the reaction. The solvent was removed, and the mixture was triturated with Et<sub>2</sub>O (200 mL). EtOAc (200 mL) was added and the mixture was stirred at 25 °C for 15 min. The mixture was then filtered over a Büchner funnel and the solid was washed with EtOAc/Et<sub>2</sub>O (V/V = 1:3, 80 mL × 3). The filtrate was combined, and the solvent was removed. The residue was purified by column chromatography (SiO<sub>2</sub>, 50–70% CH<sub>2</sub>Cl<sub>2</sub>/hexanes) to provide **8** (5.54 g, 44%) as a red solid: mp 226–228 °C; <sup>1</sup>H NMR (600 MHz, CDCl<sub>3</sub>, 298K) δ 8.66 (s, 2H), 8.05 (d, 2H, *J* = 9.2 Hz), 7.83 (d, 4H, *J* = 7.5 Hz), 7.60 (t, 2H, *J* = 7.3 Hz), 7.54 (t, 4H, *J* = 7.6 Hz), 7.02 (d, 2H, *J* = 9.2 Hz); <sup>13</sup>C NMR (151 MHz, CDCl<sub>3</sub>, 298K) δ 147.7, 146.4, 144.0, 141.1, 140.5, 134.5, 132.9, 129.8, 129.7, 127.7, 125.6, 123.0, 119.8; IR (film) ν<sub>max</sub> 3088, 2930, 1636, 1542, 1604, 1479, 1330, 1285, 849, 733, 706 cm<sup>-1</sup>; HRMS ESI-TOF *m/z* 569.1166 ([*M* + *H*]<sup>+</sup>, C<sub>26</sub>H<sub>16</sub>N<sub>8</sub>O<sub>8</sub> + *H*<sup>+</sup> requires 569.1169). Differential scanning calorimetry revealed that **8** is of high thermal potential (2755.72 J/g) with an onset temperature of 241.6 °C, which is potentially explosive and shock sensitive. Although the authors have not been able to elicit detonation through the application of shock and friction, safety precautions should be exercised and heating within 100 °C of the thermal decomposition temperature of 242 °C should be avoided especially when **8** is synthesized on large scale.

***tert*-Butyl 5-(4-Nitrophenyl)-4,6-diphenyl-1,2,3,5-tetrazine-2(5*H*)-carboxylate (9).**

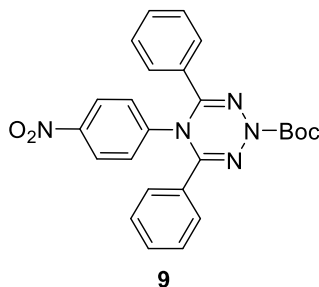

*p*-Methoxythiophenol (70.1 mg, 62 μL, 0.5 mmol, 2.5 equiv) and Et<sub>3</sub>N (50.5 mg, 70 μL, 0.5 mmol, 2.5 equiv) were sequentially added to a solution of **8** (113 mg, 0.2 mmol, 1.0 equiv) in anhydrous DMF (4.0 mL) in a 25 mL round-bottom flask. The mixture was stirred at 25 °C under an Ar

atmosphere for 1 h. The mixture was then placed in a dropping funnel and added dropwise to a cooled mixture (-50 °C) of NaH (60% in mineral oil, pre-washed with hexanes, 240 mg, 6 mmol, 30 equiv) and Boc<sub>2</sub>O (1.32 g, 6 mmol, 30 equiv) in anhydrous DMF (4.0 mL). The mixture was stirred at -50 °C for 3 h, warmed to 25 °C, and quenched by dropwise addition to a mixture of 40 mL of saturated aqueous NaHCO<sub>3</sub> and 40 mL of CH<sub>2</sub>Cl<sub>2</sub>. The mixture was extracted with CH<sub>2</sub>Cl<sub>2</sub> (40 mL × 3) and the organic phase was combined and washed with saturated aqueous NaCl (40 mL), then dried over Na<sub>2</sub>SO<sub>4</sub>. The solvent was removed and the residue was purified by column chromatography (SiO<sub>2</sub>, 30–80% CH<sub>2</sub>Cl<sub>2</sub>/hexanes) to provide **9** (64.1 mg, 70%) as a yellow solid. When the reaction was conducted on larger scales, 10 equiv of NaH and Boc<sub>2</sub>O was used and the reaction required 4 h to run to completion. A typical yield of 58–60% was observed. For **9**: mp 204 °C (decomp.); <sup>1</sup>H NMR (600 MHz, CDCl<sub>3</sub>, 298K) δ 8.02 (d, 4H, *J* = 7.1 Hz), 7.98 (d, 2H, *J* = 9.4 Hz), 7.55 (t, 2H, *J* = 7.2 Hz), 7.51 (t, 4H, *J* = 7.3 Hz), 6.82 (d, 2H, *J* = 9.4 Hz), 1.64 (s, 9H); <sup>13</sup>C NMR (151 MHz, CDCl<sub>3</sub>, 298K) δ 151.6, 147.4, 143.7, 142.4, 131.7, 131.2, 129.5, 127.5, 125.4, 117.0, 84.6, 28.2; IR (film) ν<sub>max</sub> 3056, 2925, 1753, 1591, 1510, 1366, 1344, 1245, 1272, 1052, 836, 746, 701 cm<sup>-1</sup>; HRMS ESI-TOF *m/z* 358.1297 ([*M* – Boc + H]<sup>+</sup>, C<sub>20</sub>H<sub>15</sub>N<sub>5</sub>O<sub>2</sub> + H<sup>+</sup> requires 358.1304).

***tert*-Butyl 4,6-Diphenyl-1,2,3,5-tetrazine-2(5*H*)-carboxylate (**10**).**

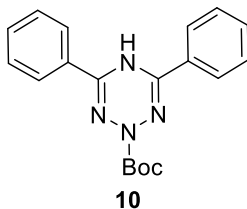

Compound **9** (1.17 g, 2.5 mmol, 1 equiv) and K<sub>2</sub>CO<sub>3</sub> (1.73 g, 12.5 mmol, 5 equiv) were added to a 100 mL round-bottom flask. DMF (25 mL) and EtSH (772 mg, 0.94 mL, 12.5 mmol, 5 equiv) were added to the mixture under an Ar atmosphere. The mixture was stirred at 25 °C for 6 h before being poured into a mixture of 100 mL of saturated aqueous NH<sub>4</sub>Cl and 100 mL of CH<sub>2</sub>Cl<sub>2</sub>. The organic layer was washed with H<sub>2</sub>O (100 mL), and dried over Na<sub>2</sub>SO<sub>4</sub>. The solvent was evaporated and the residue was purified by column chromatography (SiO<sub>2</sub>, 100% CH<sub>2</sub>Cl<sub>2</sub>, then 44% CH<sub>2</sub>Cl<sub>2</sub>/12% EtOAc/44% hexanes) to provide **10** (247 mg, 29%) as a yellow solid: mp 163–165 °C; <sup>1</sup>H NMR (600 MHz, CDCl<sub>3</sub>, 298K) δ 7.81 (d, 4H, *J* = 7.3 Hz), 7.52 (t, 2H, *J* = 7.3 Hz), 7.47 (t, 4H, *J* = 7.5 Hz), 6.74 (br s, 1H), 1.63 (s, 9H); <sup>13</sup>C NMR (151 MHz, CDCl<sub>3</sub>, 298K) δ 152.8, 146.7, 131.7, 129.8, 129.1, 125.9, 82.4, 28.4; IR (film) ν<sub>max</sub> 3213, 3061, 2966, 2926, 1685, 1658, 1456, 1411, 1312, 1146, 849, 769, 697 cm<sup>-1</sup>; HRMS ESI-TOF *m/z* 337.1664 ([*M* + H]<sup>+</sup>, C<sub>19</sub>H<sub>20</sub>N<sub>4</sub>O<sub>2</sub> + H<sup>+</sup> requires 337.1665).

**4,6-Diphenyl-1,2,3,5-tetrazine (**2**).**

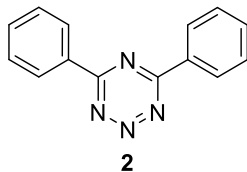



Compound **10** (247 mg, 0.74 mmol, 1 equiv) was added to a stirred mixture of MnO<sub>2</sub> (1.62 g, 18.2 mmol, 25 equiv) in anhydrous CH<sub>2</sub>Cl<sub>2</sub> (7.3 mL). The mixture was stirred at 25 °C for 1 h and directly purified by column chromatography (SiO<sub>2</sub>, CH<sub>2</sub>Cl<sub>2</sub>) within 15 min. The solvent was removed under a gentle stream of anhydrous N<sub>2</sub> to provide **2** (137 mg, 80%) as a yellow solid: mp 128 °C (decomp.); <sup>1</sup>H NMR (600 MHz, CDCl<sub>3</sub>, 298K) δ 8.77 (d, 4H, *J* = 7.2 Hz), 7.70 (t, 2H, *J* = 7.4 Hz), 7.62 (t, 4H, *J* = 7.7 Hz); <sup>13</sup>C NMR (151 MHz, CDCl<sub>3</sub>, 298K) δ 163.2, 134.3, 132.0, 129.5, 129.4; IR (film) ν<sub>max</sub> 3065, 3047, 2957, 2921, 2845, 1600, 1483, 1443, 1411, 1326, 1290, 1178, 917, 746, 683 cm<sup>-1</sup>; UV (CH<sub>3</sub>CN) λ<sub>max</sub> 275 (ε 2.52 × 10<sup>4</sup> L·mol<sup>-1</sup>·cm<sup>-1</sup>), 396 (ε 4.90 × 10<sup>2</sup> L·mol<sup>-1</sup>·cm<sup>-1</sup>) nm; HRMS ESI-TOF *m/z* 235.0984 ([M + H]<sup>+</sup>, C<sub>14</sub>H<sub>10</sub>N<sub>4</sub> + H<sup>+</sup> requires 235.0984). Differential scanning calorimetry revealed that **2** is of high thermal potential (744.17 J/g) with a low onset temperature of 138.1 °C, which is potentially explosive and shock sensitive. Although the authors have not been able to elicit detonation through the application of shock and friction, safety precautions should be exercised and extensive heating (>100 °C) should be avoided.

#### IV. Cycloaddition reactions with 4,6-diphenyl-1,2,3,5-tetrazine (**2**)

##### General procedure for the synthesis of **12a-n**

A 40 mM solution of **2** (4.68 mg, 0.02 mmol, 1 equiv) in anhydrous CH<sub>3</sub>CN (0.5 mL) was treated with the corresponding amidine **11a-n** (0.03 mmol, 1.5 equiv). The mixture was stirred at 25 °C for 2 h, and the solvent was removed under a gentle stream of N<sub>2</sub>. The residue was purified by column chromatography (SiO<sub>2</sub>, EtOAc/hexanes) or PTLC (EtOAc/hexanes) to provide **12a-n** as desired products.

##### 2,4,6-Triphenyl-1,3,5-triazine (**12a**).

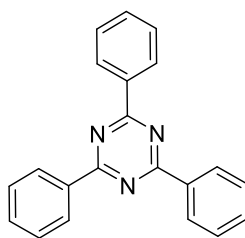

**12a**

**12a** (5.97 mg, 98%, white solid): mp 222–224 °C; <sup>1</sup>H NMR (600 MHz, CDCl<sub>3</sub>, 298K) δ 8.79 (d, 6H, *J* = 7.4 Hz), 7.62 (t, 3H, *J* = 7.1 Hz), 7.59 (t, 6H, *J* = 7.3 Hz); <sup>13</sup>C NMR (151 MHz, CDCl<sub>3</sub>, 298K) δ 171.8, 136.4, 132.7, 129.1, 128.8; IR (film) ν<sub>max</sub> 2957, 2921, 2845, 1730, 1515, 1442, 1362, 1254, 1061, 1025, 742, 692 cm<sup>-1</sup>; HRMS ESI-TOF *m/z* 310.1348 ([M + H]<sup>+</sup>, C<sub>21</sub>H<sub>15</sub>N<sub>3</sub> + H<sup>+</sup> requires 310.1344).

**2-(4-Fluorophenyl)-4,6-diphenyl-1,3,5-triazine (12b).**

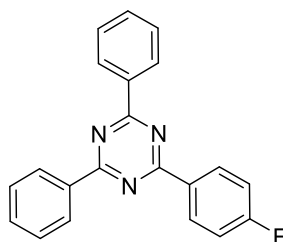

**12b**

**12b** (6.45 mg, 99%, white solid): mp 208–210 °C; <sup>1</sup>H NMR (600 MHz, CDCl<sub>3</sub>, 298K) δ 8.80 (dd, 2H, *J* = 8.9, 5.6 Hz), 8.77 (dd, 4H, *J* = 8.3, 1.3 Hz), 7.62 (t, 2H, *J* = 7.2 Hz), 7.58 (t, 4H, *J* = 7.3 Hz), 7.25 (t, 2H, *J* = 8.6 Hz); <sup>13</sup>C NMR (151 MHz, CDCl<sub>3</sub>, 298K) δ 171.8, 170.8, 166.0 (*J* = 251 Hz), 136.3, 132.7, 132.6 (*J* = 2.7 Hz), 131.4 (*J* = 8.9 Hz), 129.1, 128.8, 115.9 (*J* = 22 Hz); IR (film)  $\nu_{\max}$  3056, 2921, 2849, 1604, 1519, 1443, 1362, 1227, 1142, 836, 764, 688 cm<sup>-1</sup>; HRMS ESI-TOF *m/z* 328.1248 ([M + H]<sup>+</sup>, C<sub>21</sub>H<sub>14</sub>FN<sub>3</sub> + H<sup>+</sup> requires 328.1250).

**2-(4-Bromophenyl)-4,6-diphenyl-1,3,5-triazine (12c).**

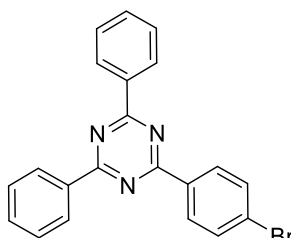

**12c**

**12c** (7.33 mg, 94%, white solid): mp 190–191 °C; <sup>1</sup>H NMR (600 MHz, CDCl<sub>3</sub>, 298K) δ 8.78 (d, 4H, *J* = 7.0 Hz), 8.67 (d, 2H, *J* = 8.6 Hz), 7.73 (d, 2H, *J* = 8.6 Hz), 7.65 (t, 2H, *J* = 7.2 Hz), 7.61 (t, 4H, *J* = 7.3 Hz); <sup>13</sup>C NMR (151 MHz, CDCl<sub>3</sub>, 298K) δ 171.9, 171.0, 136.2, 135.4, 132.8, 132.1, 130.6, 129.1, 128.8, 127.6; IR (film)  $\nu_{\max}$  3056, 2917, 2854, 1591, 1506, 1443, 1366, 1169, 1007, 836, 764, 688 cm<sup>-1</sup>; HRMS ESI-TOF *m/z* 388.0449 ([M + H]<sup>+</sup>, C<sub>21</sub>H<sub>14</sub>BrN<sub>3</sub> + H<sup>+</sup> requires 388.0452).

**2-(4-Methoxyphenyl)-4,6-diphenyl-1,3,5-triazine (12d).**

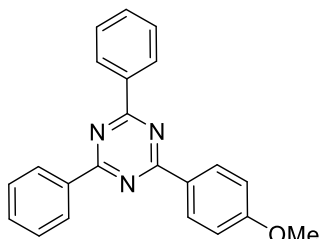

**12d**

**12d** (6.68 mg, 98%, white solid): mp 161–163 °C; <sup>1</sup>H NMR (600 MHz, CDCl<sub>3</sub>, 298K) δ 8.77 (dd, 4H, *J* = 8.2, 1.4 Hz), 8.75 (d, 2H, *J* = 8.9 Hz), 7.61 (t, 2H, *J* = 7.2 Hz), 7.57 (t, 4H, *J* = 7.2 Hz),

7.07 (d, 2H,  $J = 8.9$  Hz), 3.93 (s, 3H);  $^{13}\text{C}$  NMR (151 MHz,  $\text{CDCl}_3$ , 298K)  $\delta$  171.5, 171.3, 163.5, 136.6, 132.5, 131.0, 129.0, 128.9, 128.7, 114.1, 55.6; IR (film)  $\nu_{\text{max}}$  3065, 2926, 2836, 1582, 1510, 1443, 1371, 1254, 1173, 769, 683  $\text{cm}^{-1}$ ; HRMS ESI-TOF  $m/z$  340.1454 ( $[\text{M} + \text{H}]^+$ ,  $\text{C}_{22}\text{H}_{17}\text{N}_3\text{O} + \text{H}^+$  requires 340.1450).

#### 4-(4,6-Diphenyl-1,3,5-triazin-2-yl)aniline (**12e**).

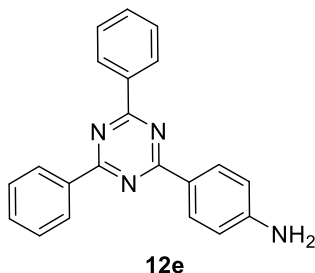

**12e** (6.31 mg, 97%, yellow solid): mp 197–199 °C;  $^1\text{H}$  NMR (600 MHz,  $\text{CDCl}_3$ , 298K)  $\delta$  8.76 (d, 4H,  $J = 6.8$  Hz), 8.62 (d, 2H,  $J = 8.6$  Hz), 7.60 (t, 2H,  $J = 7.1$  Hz), 7.56 (t, 4H,  $J = 7.1$  Hz), 6.81 (d, 2H,  $J = 8.6$  Hz), 4.11 (s, 2H);  $^{13}\text{C}$  NMR (151 MHz,  $\text{CDCl}_3$ , 298K)  $\delta$  171.5, 171.3, 150.9, 136.8, 132.3, 131.1, 129.0, 128.7, 126.3, 114.6; IR (film)  $\nu_{\text{max}}$  3465, 3326, 3218, 2917, 2845, 1636, 1600, 1510, 1438, 1362, 1303, 1173, 764, 683  $\text{cm}^{-1}$ ; HRMS ESI-TOF  $m/z$  325.1454 ( $[\text{M} + \text{H}]^+$ ,  $\text{C}_{21}\text{H}_{16}\text{N}_4 + \text{H}^+$  requires 325.1453).

#### 2-(3-Nitrophenyl)-4,6-diphenyl-1,3,5-triazine (**12f**).

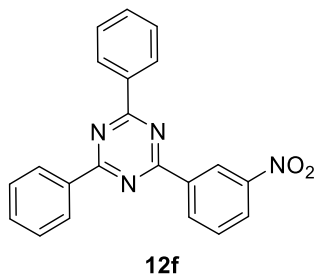

**12f** (6.62 mg, 94%, white solid): mp 194–196 °C;  $^1\text{H}$  NMR (600 MHz,  $\text{CDCl}_3$ , 298K)  $\delta$  9.56 (t, 1H,  $J = 1.9$  Hz), 9.09 (dt, 1H,  $J = 7.7, 1.2$  Hz), 8.77 (d, 4H,  $J = 7.1$  Hz), 8.45 (ddd, 1H,  $J = 8.1, 2.2, 1.0$  Hz), 7.76 (t, 1H,  $J = 7.9$  Hz), 7.65 (t, 2H,  $J = 7.2$  Hz), 7.60 (t, 4H,  $J = 7.4$  Hz);  $^{13}\text{C}$  NMR (151 MHz,  $\text{CDCl}_3$ , 298K)  $\delta$  172.2, 169.8, 148.9, 138.3, 135.8, 134.7, 133.1, 129.8, 129.2, 128.9, 126.9, 124.0; IR (film)  $\nu_{\text{max}}$  3088, 3061, 1591, 1515, 1506, 1438, 1366, 1348, 733, 693  $\text{cm}^{-1}$ ; HRMS ESI-TOF  $m/z$  355.1193 ( $[\text{M} + \text{H}]^+$ ,  $\text{C}_{21}\text{H}_{14}\text{N}_4\text{O}_2 + \text{H}^+$  requires 355.1195).

**2,4-Diphenyl-6-(pyridin-2-yl)-1,3,5-triazine (12g).**

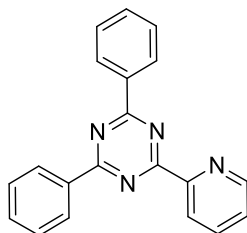

**12g**

**12g** (5.39 mg, 87%, white solid): mp 210–212 °C; <sup>1</sup>H NMR (600 MHz, CDCl<sub>3</sub>, 298K) δ 8.97 (ddd, 1H, *J* = 4.7, 1.6, 0.8 Hz), 8.82–8.80 (m, 5H), 7.97 (td, 1H, *J* = 7.7, 1.7 Hz), 7.63 (t, 2H, *J* = 7.3 Hz), 7.58 (t, 4H, *J* = 7.3 Hz), 7.53 (ddd, 1H, *J* = 7.5, 4.7, 1.1 Hz); <sup>13</sup>C NMR (151 MHz, CDCl<sub>3</sub>, 298K) δ 172.5, 171.2, 154.1, 150.6, 137.2, 136.0, 132.9, 129.4, 128.8, 126.3, 125.0; IR (film)  $\nu_{\max}$  3061, 2921, 2849, 1591, 1524, 1452, 1371, 751, 688 cm<sup>-1</sup>; HRMS ESI-TOF *m/z* = 311.1301 ([M + H]<sup>+</sup>, C<sub>20</sub>H<sub>14</sub>N<sub>4</sub> + H<sup>+</sup> requires 311.1297).

**2,4-Diphenyl-6-(pyrimidin-2-yl)-1,3,5-triazine (12h).**

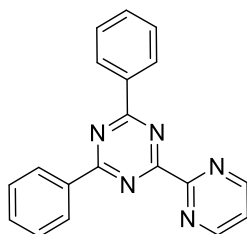

**12h**

**12h** (6.02 mg, 97%, white solid): mp 200–203 °C; <sup>1</sup>H NMR (600 MHz, CDCl<sub>3</sub>, 298K) δ 9.12 (d, 2H, *J* = 4.8 Hz), 8.80 (d, 4H, *J* = 7.0 Hz), 7.63 (t, 2H, *J* = 7.3 Hz), 7.57 (t, 4H, *J* = 7.4 Hz), 7.54 (t, 1H, *J* = 4.8 Hz); <sup>13</sup>C NMR (151 MHz, CDCl<sub>3</sub>, 298K) δ 173.0, 170.7, 162.6, 158.3, 135.6, 133.1, 129.5, 128.9, 122.2; IR (film)  $\nu_{\max}$  3061, 3038, 1582, 1564, 1524, 1492, 1366, 755, 688 cm<sup>-1</sup>; HRMS ESI-TOF *m/z* 312.1250 ([M + H]<sup>+</sup>, C<sub>19</sub>H<sub>13</sub>N<sub>5</sub> + H<sup>+</sup> requires 312.1249).

**2,4-Diphenyl-6-(thiophen-2-yl)-1,3,5-triazine (12i).**

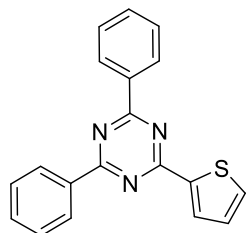

**12i**

**12i** (5.91 mg, 94%, white solid): mp 182–184 °C; <sup>1</sup>H NMR (600 MHz, CDCl<sub>3</sub>, 298K) δ 8.73 (dd, 4H, *J* = 8.3, 1.3 Hz), 8.38 (dd, 1H, *J* = 3.7, 1.2 Hz), 7.65 (dd, 1H, *J* = 4.9, 1.2 Hz), 7.61 (t, 2H, *J* = 7.2 Hz), 7.57 (t, 4H, *J* = 7.3 Hz), 7.25 (dd, 1H, *J* = 4.9, 3.7 Hz); <sup>13</sup>C NMR (151 MHz, CDCl<sub>3</sub>,

298K)  $\delta$  171.7, 168.3, 142.3, 136.1, 132.7, 132.3, 131.6, 129.1, 128.8, 128.6; IR (film)  $\nu_{\max}$  3097, 3043, 1578, 1542, 1519, 1438, 1398, 1371, 764, 697  $\text{cm}^{-1}$ ; HRMS ESI-TOF  $m/z$  316.0908 ( $[\text{M} + \text{H}]^+$ ,  $\text{C}_{19}\text{H}_{13}\text{N}_3\text{S} + \text{H}^+$  requires 316.0908).

**2,4-Diphenyl-6-(6-(trifluoromethyl)pyridin-3-yl)-1,3,5-triazine (12j).**

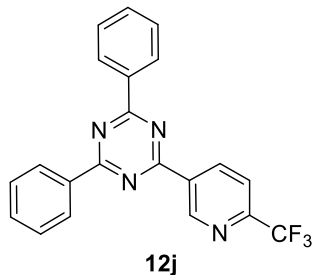

**12j** (7.43 mg, 91%, white solid): mp 166–168 °C;  $^1\text{H}$  NMR (600 MHz,  $\text{CDCl}_3$ , 298K)  $\delta$  9.97 (d, 1H,  $J = 1.6$  Hz), 9.10 (dd, 1H,  $J = 8.0, 1.6$  Hz), 8.71 (d, 4H,  $J = 7.0$  Hz), 7.86 (d, 1H,  $J = 8.1$  Hz), 7.63 (t, 2H,  $J = 7.3$  Hz), 7.57 (t, 4H,  $J = 7.5$  Hz);  $^{13}\text{C}$  NMR (151 MHz,  $\text{CDCl}_3$ , 298K)  $\delta$  172.2, 169.1, 151.0, 150.8, 137.7, 135.5, 134.6, 133.2, 129.2, 128.9, 121.6 (q,  $J = 273$  Hz), 120.4 (q,  $J = 2.6$  Hz); IR (film)  $\nu_{\max}$  3070, 1591, 1515, 1393, 1348, 1326, 1169, 1137, 1119, 1083, 760, 697, 683  $\text{cm}^{-1}$ ; HRMS ESI-TOF  $m/z$  379.1170 ( $[\text{M} + \text{H}]^+$ ,  $\text{C}_{21}\text{H}_{13}\text{F}_3\text{N}_4 + \text{H}^+$  requires 379.1171).

**2-(2,6-Dichlorobenzyl)-4,6-diphenyl-1,3,5-triazine (12k).**

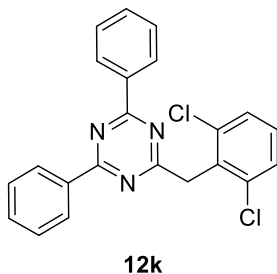

**12k** (7.65 mg, 98%, white solid): mp 151–152 °C;  $^1\text{H}$  NMR (600 MHz,  $\text{CDCl}_3$ , 298K)  $\delta$  8.56 (d, 4H,  $J = 7.1$  Hz), 7.56 (t, 2H,  $J = 7.3$  Hz), 7.50 (t, 4H,  $J = 7.5$  Hz), 7.40 (d, 2H,  $J = 8.1$  Hz), 7.23 (t, 1H,  $J = 8.1$  Hz), 4.74 (s, 2H);  $^{13}\text{C}$  NMR (151 MHz,  $\text{CDCl}_3$ , 298K)  $\delta$  176.6, 171.5, 136.7, 136.1, 133.8, 132.6, 129.1, 128.73, 128.70, 128.1, 40.7; IR (film)  $\nu_{\max}$  3052, 2917, 2849, 1515, 1429, 1357, 926, 787, 742, 683  $\text{cm}^{-1}$ ; HRMS ESI-TOF  $m/z$  392.0718 ( $[\text{M} + \text{H}]^+$ ,  $\text{C}_{22}\text{H}_{15}\text{Cl}_2\text{N}_3 + \text{H}^+$  requires 392.0721).

### 2-Benzyl-4,6-diphenyl-1,3,5-triazine (12l).

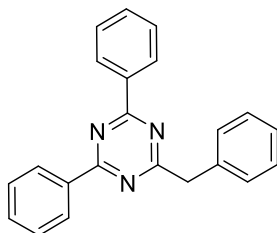

12l

**12l** (5.72 mg, 89%, white solid): mp 93–94 °C; <sup>1</sup>H NMR (600 MHz, CDCl<sub>3</sub>, 298K) δ 8.64 (d, 4H, *J* = 7.2 Hz), 7.58 (t, 2H, *J* = 7.3 Hz), 7.54–7.51 (m, 6H), 7.34 (t, 2H, *J* = 7.7 Hz), 7.26 (t, 1H, *J* = 7.4 Hz), 4.33 (s, 2H); <sup>13</sup>C NMR (151 MHz, CDCl<sub>3</sub>, 298K) δ 178.4, 171.7, 137.4, 136.1, 132.6, 129.6, 129.1, 128.8, 128.6, 126.9, 46.0; IR (film)  $\nu_{\max}$  3065, 3029, 2917, 1587, 1519, 1447, 1362, 755, 710, 688 cm<sup>-1</sup>; HRMS ESI-TOF *m/z* 324.1507 ([M + H]<sup>+</sup>, C<sub>22</sub>H<sub>17</sub>N<sub>3</sub> + H<sup>+</sup> requires 324.1501).

### 2-Phenethyl-4,6-diphenyl-1,3,5-triazine (12m).

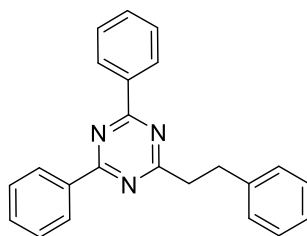

12m

**12m** (6.60 mg, 98%, white solid): mp 77–79 °C; <sup>1</sup>H NMR (600 MHz, CDCl<sub>3</sub>, 298K) δ 8.66 (d, 4H, *J* = 7.1 Hz), 7.60 (t, 2H, *J* = 7.2 Hz), 7.55 (t, 4H, *J* = 7.4 Hz), 7.34 (d, 2H, *J* = 6.9 Hz), 7.31 (t, 2H, *J* = 7.6 Hz), 7.21 (t, 1H, *J* = 7.1 Hz), 3.38–3.35 (m, 2H), 3.34–3.31 (m, 2H); <sup>13</sup>C NMR (151 MHz, CDCl<sub>3</sub>, 298K) δ 179.1, 171.4, 141.4, 136.2, 132.6, 129.1, 128.8, 128.7, 128.6, 126.2, 40.8, 33.5; IR (film)  $\nu_{\max}$  3061, 3025, 2921, 1587, 1519, 1447, 1366, 1178, 751, 692 cm<sup>-1</sup>; HRMS ESI-TOF *m/z* 338.1663 ([M + H]<sup>+</sup>, C<sub>23</sub>H<sub>19</sub>N<sub>3</sub> + H<sup>+</sup> requires 338.1657).

### 2-Cyclopropyl-4,6-diphenyl-1,3,5-triazine (12n).

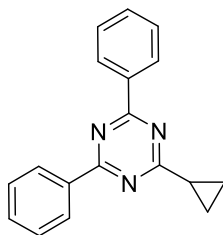

12n

**12n** (5.36 mg, 98%, white solid): mp 81–83 °C; <sup>1</sup>H NMR (600 MHz, CDCl<sub>3</sub>, 298K) δ 8.63 (d, 4H, *J* = 7.1 Hz), 7.58 (t, 2H, *J* = 7.2 Hz), 7.53 (t, 4H, *J* = 7.4 Hz), 2.35–2.31 (m, 1H), 1.44–1.41 (m, 2H), 1.22–1.19 (m, 2H); <sup>13</sup>C NMR (151 MHz, CDCl<sub>3</sub>, 298K) δ 181.1, 170.8, 136.3, 132.4, 129.0,

128.7, 18.5, 11.9; IR (film)  $\nu_{\max}$  3056, 2993, 2917, 1587, 1524, 1443, 1366, 935, 764, 706  $\text{cm}^{-1}$ . HRMS ESI-TOF  $m/z$  274.1350 ( $[\text{M} + \text{H}]^+$ ,  $\text{C}_{18}\text{H}_{15}\text{N}_3 + \text{H}^+$  requires 274.1344).

### Reaction of **2** with **11l** in protic solvent

A solution of amidine **11l** (4.0 mg, 0.03 mmol, 1.5 equiv) in  $\text{CH}_3\text{CN}/\text{H}_2\text{O}$  (V/V = 7:3, 0.5 mL) was added to **2** (4.68 mg, 0.02 mmol, 1 equiv), resulting in a suspension. The mixture was stirred at 25 °C for 2 h, and the solvent was removed under a gentle stream of  $\text{N}_2$ . The residue was purified by PTLC (17% EtOAc/hexanes) to provide **12l** (5.75 mg, 89%) as a white solid.

A solution of amidine **11l** (4.0 mg, 0.03 mmol, 1.5 equiv) in  $\text{CH}_3\text{CN}/\text{H}_2\text{O}$  (V/V = 3:7, 0.5 mL) was added to **2** (4.68 mg, 0.02 mmol, 1 equiv), resulting in a suspension. The mixture was stirred at 25 °C for 2 h, and the solvent was removed under a gentle stream of  $\text{N}_2$ . The residue was purified by PTLC (17% EtOAc/hexanes) to provide **12l** (6.09 mg, 94%) as a white solid.

### Synthesis of **12l** from **13a**

#### Condition A

A 40 mM solution of **2** (4.68 mg, 0.02 mmol, 1 equiv) in anhydrous  $\text{CH}_3\text{CN}$  (0.5 mL) was treated with **13a** (4.59 mg, 0.03 mmol, 1.5 equiv) and the mixture was stirred at 25 °C for 48 h. The solvent was removed under a gentle stream of  $\text{N}_2$  and the mixture was purified by PTLC (17% EtOAc/hexanes) to provide **12l** (3.02 mg, 47%) as a white solid.

#### Condition B

A 400 mM solution of **2** (4.68 mg, 0.02 mmol, 1 equiv) in anhydrous  $\text{CHCl}_3$  (50  $\mu\text{L}$ ) was treated with **13a** (15.1 mg, 0.10 mmol, 5 equiv) and the mixture was stirred at 25 °C for 48 h. The solvent was removed under a gentle stream of  $\text{N}_2$  and the mixture was purified by PTLC (17% EtOAc/hexanes) to provide **12l** (4.27 mg, 68%) as a white solid.

### Synthesis of **12l** from **13b**

#### Condition A

A 40 mM solution of **2** (4.68 mg, 0.02 mmol, 1 equiv) in anhydrous  $\text{CH}_3\text{CN}$  (0.5 mL) was treated with **13b** (4.44 mg, 0.03 mmol, 1.5 equiv) and the mixture was warmed at 80 °C for 48 h in a sealed tube. The solvent was removed under a gentle stream of  $\text{N}_2$  and the mixture was purified by PTLC (17% EtOAc/hexanes) to provide **12l** (2.23 mg, 35%) as a white solid.

#### Condition B

A 400 mM solution of **2** (4.68 mg, 0.02 mmol, 1 equiv) in anhydrous  $\text{CHCl}_3$  (50  $\mu\text{L}$ ) was treated with **13b** (14.9 mg, 0.10 mmol, 5 equiv) and the mixture was stirred at 25 °C for 48 h. The solvent was removed under a gentle stream of  $\text{N}_2$  and the mixture was purified by PTLC (17% EtOAc/hexanes) to provide **12l** (2.72 mg, 43%) as a white solid.

### General procedure for the synthesis of 15a-d

A 40 mM solution of **2** (4.68 mg, 0.02 mmol, 1 equiv) in anhydrous CH<sub>3</sub>CN (0.5 mL) was treated with crushed 4Å molecular sieves (20 mg) and the corresponding enamine **14a-d** (0.024 mmol, 1.2 equiv). The mixture was stirred at 25 °C for 3 h, and then warmed at 60 °C for 24 h. The mixture was cooled and filtered through Celite. The solvent was removed under a gentle stream of N<sub>2</sub> and the mixture was purified by column chromatography (SiO<sub>2</sub>, EtOAc/hexanes) to provide **15a-d** as desired products.

#### 2,4-Diphenyl-6,7-dihydro-5H-cyclopenta[*d*]pyrimidine (**15a**).

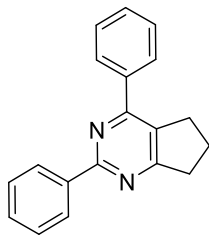

**15a**

**15a** (4.53 mg, 83%, white solid): mp 72–73 °C; <sup>1</sup>H NMR (600 MHz, CDCl<sub>3</sub>, 298K) δ 8.55 (dd, 2H, *J* = 8.1, 1.5 Hz), 8.07 (d, 2H, *J* = 7.0 Hz), 7.55–7.46 (m, 6H), 3.25 (t, 2H, *J* = 7.3 Hz), 3.14 (t, 2H, *J* = 7.7 Hz), 2.22–2.17 (m, 2H); <sup>13</sup>C NMR (151 MHz, CDCl<sub>3</sub>, 298K) δ 176.7, 163.3, 159.5, 138.4, 138.3, 130.3, 130.0, 129.1, 128.9, 128.7, 128.6, 128.3, 34.6, 31.1, 23.1; IR (film) ν<sub>max</sub> 3061, 2953, 2921, 2854, 1555, 1384, 1258, 1092, 1065, 1029, 804, 746, 697 cm<sup>-1</sup>; HRMS ESI-TOF *m/z* 273.1396 ([M + H]<sup>+</sup>, C<sub>19</sub>H<sub>16</sub>N<sub>2</sub> + H<sup>+</sup> requires 273.1392).

#### 2,4-Diphenyl-5,6,7,8-tetrahydroquinazoline (**15b**).

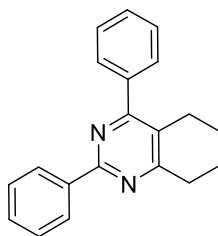

**15b**

**15b** (2.47 mg, 43%, white solid): mp 103–105 °C; <sup>1</sup>H NMR (600 MHz, CDCl<sub>3</sub>, 298K) δ 8.47 (dd, 2H, *J* = 8.2, 1.6 Hz), 7.66 (dd, 2H, *J* = 7.4, 2.0 Hz), 7.51–7.42 (m, 6H), 3.04 (t, 2H, *J* = 6.6 Hz), 2.80 (t, 2H, *J* = 6.2 Hz), 1.99–1.95 (m, 2H), 1.81–1.77 (m, 2H); <sup>13</sup>C NMR (151 MHz, CDCl<sub>3</sub>) δ 166.7, 165.1, 161.4, 138.7, 138.2, 130.0, 129.04, 128.97, 128.4, 128.2, 128.1, 125.4, 32.8, 27.0, 22.9, 22.5; IR (film) ν<sub>max</sub> 3052, 2930, 2858, 1542, 1497, 1420, 1398, 1258, 1164, 1029, 751, 692 cm<sup>-1</sup>; HRMS ESI-TOF *m/z* 287.1552 ([M + H]<sup>+</sup>, C<sub>20</sub>H<sub>18</sub>N<sub>2</sub> + H<sup>+</sup> requires 287.1548).



### 2,4-Diphenyl-6,7,8,9-tetrahydro-5H-cyclohepta[d]pyrimidine (15c).

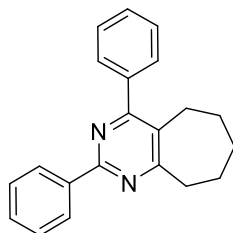

15c

**15c** (3.59 mg, 60%, white solid): mp 119–121 °C; <sup>1</sup>H NMR (600 MHz, CDCl<sub>3</sub>, 298K) δ 8.49 (dd, 2H, *J* = 8.0, 1.6 Hz), 7.59 (dd, 2H, *J* = 8.1, 1.4 Hz), 7.53–7.41 (m, 6H), 3.18–3.16 (m, 2H), 2.89–2.87 (m, 2H), 1.96–1.92 (m, 2H), 1.83 (tt, 2H, *J* = 11.0, 4.6 Hz), 1.73–1.69 (m, 2H); <sup>13</sup>C NMR (151 MHz, CDCl<sub>3</sub>, 298K) δ 172.9, 164.5, 161.2, 139.4, 138.2, 130.6, 130.1, 129.4, 128.9, 128.5, 128.4, 128.2, 39.5, 32.4, 29.3, 27.9, 26.3; IR (film)  $\nu_{\max}$  3056, 2921, 2854, 1542, 1496, 1447, 1393, 1174, 764, 695 cm<sup>-1</sup>; HRMS ESI-TOF *m/z* 301.1711 ([M + H]<sup>+</sup>, C<sub>21</sub>H<sub>20</sub>N<sub>2</sub> + H<sup>+</sup> requires 301.1705).

### 2,4,6-Triphenylpyrimidine (15d).

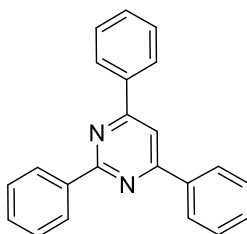

15d

**15d** (2.79 mg, 45%, white solid): mp 151–153 °C; <sup>1</sup>H NMR (600 MHz, CDCl<sub>3</sub>, 298K) δ 8.74 (dd, 2H, *J* = 8.1, 1.5 Hz), 8.30 (dd, 4H, *J* = 8.0, 1.6 Hz), 8.03 (s, 1H), 7.59–7.53 (m, 9H); <sup>13</sup>C NMR (151 MHz, CDCl<sub>3</sub>, 298K) δ 164.9, 164.7, 138.3, 137.7, 130.9, 130.8, 129.1, 128.62, 128.60, 127.4, 110.5; IR (film)  $\nu_{\max}$  3056, 2926, 1591, 1573, 1523, 1492, 1362, 742, 683 cm<sup>-1</sup>; HRMS ESI-TOF *m/z* 309.1391 ([M + H]<sup>+</sup>, C<sub>22</sub>H<sub>16</sub>N<sub>2</sub> + H<sup>+</sup> requires 309.1392).

### N,N-Diethyl-5-methyl-2,6-diphenylpyrimidin-4-amine (17a).

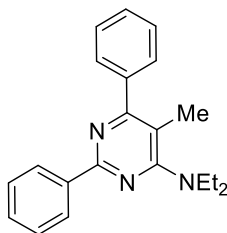

17a

A 40 mM solution of **2** (4.68 mg, 0.02 mmol, 1 equiv) in anhydrous CH<sub>3</sub>CN (0.5 mL) was treated with ynamine **16a** (3.33 mg, 0.03 mmol, 1.5 equiv). The mixture was stirred at 25 °C for 1 h, and the solvent was removed under a gentle stream of N<sub>2</sub>. The residue was purified by column

chromatography (SiO<sub>2</sub>, 10% EtOAc/hexanes) to provide **17a** (5.72 mg, 90%) as a white solid: mp 111–113 °C; <sup>1</sup>H NMR (600 MHz, CDCl<sub>3</sub>, 298K) δ 8.50 (dd, 2H, *J* = 8.1, 1.6 Hz), 7.70 (dd, 2H, *J* = 8.1, 1.3 Hz), 7.48–7.42 (m, 6H), 3.57 (q, 4H, *J* = 7.0 Hz), 2.23 (s, 3H), 1.30 (t, 6H, *J* = 7.0 Hz); <sup>13</sup>C NMR (151 MHz, CDCl<sub>3</sub>, 298K) δ 166.4, 165.9, 159.9, 140.3, 138.9, 129.9, 129.8, 128.8, 128.3, 128.2, 128.1, 112.4, 44.2, 18.0, 13.6; IR (film) ν<sub>max</sub> 3060, 2966, 2926, 2867, 1546, 1492, 1402, 1353, 1128, 1011, 764, 701 cm<sup>-1</sup>; HRMS ESI-TOF *m/z* 318.1973 ([M + H]<sup>+</sup>, C<sub>21</sub>H<sub>23</sub>N<sub>3</sub> + H<sup>+</sup> requires 318.1970).

#### **N,N-Dibenzyl-5-methyl-2,6-diphenylpyrimidin-4-amine (17b).**

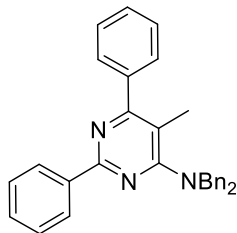

**17b**

A 40 mM solution of **2** (4.68 mg, 0.02 mmol, 1 equiv) in anhydrous CH<sub>3</sub>CN (0.5 mL) was treated with ynamine **16b** (7.05 mg, 0.03 mmol, 1.5 equiv). The mixture was stirred at 25 °C for 24 h, and the solvent was removed under a gentle stream of N<sub>2</sub>. The residue was purified by column chromatography (SiO<sub>2</sub>, 17% EtOAc/hexanes) to provide **17b** (8.09 mg, 92%) as a white solid: mp 126–128 °C; <sup>1</sup>H NMR (600 MHz, CDCl<sub>3</sub>, 298K) δ 8.44 (m, 2H), 7.68 (dd, 2H, *J* = 8.1, 1.4 Hz), 7.48–7.45 (m, 3H), 7.44–7.41 (m, 3H), 7.33–7.32 (m, 8H), 7.28–7.24 (m, 2H), 4.78 (s, 4H), 2.33 (s, 3H); <sup>13</sup>C NMR (151 MHz, CDCl<sub>3</sub>, 298K) δ 166.74, 166.72, 160.2, 140.0, 138.6, 138.5, 130.0, 129.9, 129.0, 128.7, 128.29, 128.26, 128.2, 127.9, 127.2, 112.5, 53.1, 18.0; IR (film) ν<sub>max</sub> 3065, 3020, 2912, 1537, 1497, 1452, 1398, 1357, 1263, 1169, 1007, 737, 701 cm<sup>-1</sup>; HRMS ESI-TOF *m/z* 442.2285 ([M + H]<sup>+</sup>, C<sub>31</sub>H<sub>27</sub>N<sub>3</sub> + H<sup>+</sup> requires 442.2283).

#### **4-Ethoxy-2,6-diphenylpyrimidine (19).**

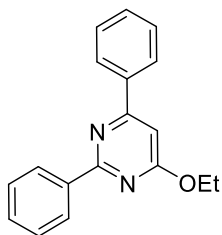

**19**

A 40 mM solution of **2** (4.68 mg, 0.02 mmol, 1 equiv) in anhydrous CHCl<sub>3</sub> (0.5 mL) was treated with ketene acetal **18** (11.6 mg, 0.1 mmol, 5 equiv). The mixture was heated at 60 °C for 24 h in a sealed tube. The solvent was removed under a gentle stream of N<sub>2</sub>. The residue was purified by PTLC (SiO<sub>2</sub>, 25% EtOAc/hexanes) to provide **19** (3.30 mg, 60%) as a white solid: mp 61–62 °C; <sup>1</sup>H NMR (600 MHz, CDCl<sub>3</sub>, 298K) δ 8.59 (dd, 2H, *J* = 7.9, 1.9 Hz), 8.18 (dd, 2H, *J* = 7.9, 1.6 Hz), 7.53–7.49 (m, 6H), 7.01 (s, 1H), 4.62 (q, 2H, *J* = 7.1 Hz), 1.49 (t, 3H, *J* = 7.1 Hz); <sup>13</sup>C NMR (151 MHz, CDCl<sub>3</sub>, 298K) δ 170.6, 164.9, 164.1, 138.1, 137.5, 130.7, 130.6, 128.9, 128.49, 128.48,

127.3, 101.4, 62.5, 14.7; IR (film)  $\nu_{\max}$  3061, 2975, 2926, 1591, 1568, 1541, 1411, 1375, 1339, 1209, 1025, 760, 697  $\text{cm}^{-1}$ ; HRMS ESI-TOF  $m/z$  277.1341 ( $[\text{M} + \text{H}]^+$ ,  $\text{C}_{18}\text{H}_{16}\text{N}_2\text{O} + \text{H}^+$  requires 277.1341).

#### 4-(2,6-Diphenylpyrimidin-4-yl)-*N,N*-dimethylaniline (**21**).

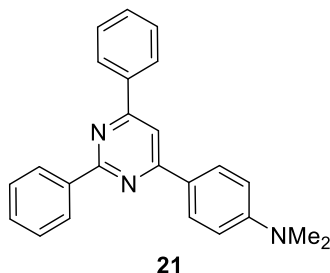

Compound **2** (4.68 mg, 0.02 mmol) was treated with **20** (100  $\mu\text{L}$ ) and the mixture was warmed at 80  $^{\circ}\text{C}$  for 72 h. The mixture was cooled to room temperature and purified by PTLC ( $\text{SiO}_2$ , 25% EtOAc/hexanes) to provide **21** (2.01 mg, 28%) as a yellow solid: mp 162–164  $^{\circ}\text{C}$ ;  $^1\text{H}$  NMR (600 MHz,  $\text{CDCl}_3$ , 298K)  $\delta$  8.73 (dd, 2H,  $J = 8.2, 1.4$  Hz), 8.28 (dd, 2H,  $J = 8.2, 1.4$  Hz), 8.25 (d, 2H,  $J = 9.0$  Hz), 7.92 (s, 1H), 7.57–7.49 (m, 6H), 6.86 (d, 2H,  $J = 7.4$  Hz), 3.08 (s, 6H);  $^{13}\text{C}$  NMR (151 MHz,  $\text{CDCl}_3$ , 298K)  $\delta$  164.6, 164.3, 164.2, 138.7, 138.2, 130.6, 130.5, 129.0, 128.59, 128.55, 128.5, 127.3, 112.2, 108.8, 40.5; IR (film)  $\nu_{\max}$  3056, 2953, 2912, 2849, 2804, 1613, 1587, 1564, 1519, 1492, 1357, 1200, 1169, 818, 755, 692  $\text{cm}^{-1}$ ; HRMS ESI-TOF  $m/z$  352.1817 ( $[\text{M} + \text{H}]^+$ ,  $\text{C}_{24}\text{H}_{21}\text{N}_3 + \text{H}^+$  requires 352.1814).

#### ((6*aS*,7*S*,7*aR*)-2,4-Diphenyl-6,6*a*,7,7*a*,8,9-hexahydro-5*H*-cyclopropa[5,6]cycloocta[1,2-*d*]pyrimidin-7-yl)methanol (**23**).

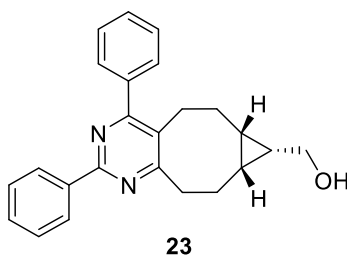

A 400 mM solution of **2** (4.68 mg, 0.02 mmol, 1 equiv) in anhydrous  $\text{CHCl}_3$  (50  $\mu\text{L}$ ) was treated with **22** (12.00 mg, 0.08 mmol, 4 equiv). The mixture was stirred at 25  $^{\circ}\text{C}$  for 48 h. The solvent was removed under a gentle stream of  $\text{N}_2$ . The residue was purified by PTLC ( $\text{SiO}_2$ , EtOAc) to provide **23** (6.93 mg, 97%) as a white solid: mp 93–95  $^{\circ}\text{C}$ ;  $^1\text{H}$  NMR (600 MHz,  $\text{CDCl}_3$ , 298K)  $\delta$  8.48 (dd, 2H,  $J = 7.9, 1.7$  Hz), 7.56 (dd, 2H, 7.9, 1.5 Hz), 7.51–7.43 (m, 6H), 3.80 (dd, 1H, 11.4, 7.4 Hz), 3.73 (dd, 1H, 11.3, 7.4 Hz), 3.34–3.29 (m, 1H), 3.18–3.14 (m, 1H), 3.01–2.96 (m, 1H), 2.80–2.76 (m, 1H), 1.69–1.52 (m, 2H), 1.26 (s, 1H), 1.20–1.12 (m, 2H), 1.08–0.99 (m, 1H);  $^{13}\text{C}$  NMR (151 MHz,  $\text{CDCl}_3$ , 298K)  $\delta$  171.7, 165.8, 139.6, 138.1, 130.2, 129.7, 129.0, 128.9, 128.5, 128.4, 128.3, 59.7, 36.8, 27.1, 24.7, 23.3, 22.6, 21.7, 19.7; IR (film)  $\nu_{\max}$  3375, 3056, 2921, 2872, 1542, 1393, 1263, 1025, 769, 733, 697  $\text{cm}^{-1}$ ; HRMS ESI-TOF  $m/z$  357.1968 ( $[\text{M} + \text{H}]^+$ ,  $\text{C}_{24}\text{H}_{24}\text{N}_2\text{O} + \text{H}^+$  requires 357.1967).

## V. Comparison of reactivity between **2** and **24**

### (a) Reaction with amidine **111**

A 40 mM solution of **2** (4.68 mg, 0.02 mmol, 1 equiv) in anhydrous CH<sub>3</sub>CN (0.5 mL) was treated with amidine **111** (5.10 mg, 0.03 mmol, 1.5 equiv). The mixture was stirred at 25 °C for 2 h, and the solvent was removed under a gentle stream of N<sub>2</sub>. The residue was purified by column chromatography (SiO<sub>2</sub>, 17% EtOAc/hexanes) to provide **121** (5.72 mg, 89%) as a white solid.

A 40 mM solution of **24** (4.68 mg, 0.02 mmol, 1 equiv) in anhydrous CHCl<sub>3</sub>/CH<sub>3</sub>CN (V/V = 1:1, 0.5 mL) was treated with amidine **111** (4.0 mg, 0.03 mmol, 1.5 equiv). No conversion was observed after 2 h.

A 40 mM solution of **2** (4.68 mg, 0.02 mmol, 1 equiv) and **24** (4.68 mg, 0.02 mmol, 1 equiv) in anhydrous CHCl<sub>3</sub>/CH<sub>3</sub>CN (V/V = 1:1, 0.5 mL) was treated with amidine **111** (2.68 mg, 0.03 mmol, 1.0 equiv). The mixture was stirred at 25 °C for 2 h, and the solvent was removed under a gentle stream of N<sub>2</sub>. The residue was purified by PTLC (SiO<sub>2</sub>, 17% EtOAc/hexanes) to provide **121** (5.94 mg, 92%) as a white solid.

### (b) Reaction with cyclooctyne **22**

A 5 mM solution of **24** (2.34 mg, 0.01 mmol, 1 equiv) in anhydrous CH<sub>3</sub>CN (2 mL) was treated with cyclooctyne **22** (6.00 mg, 0.04 mmol, 4 equiv). The mixture was stirred at 25 °C for 10 min, and the solvent was removed under a gentle stream of N<sub>2</sub>. The residue was purified by PTLC (SiO<sub>2</sub>, EtOAc) to provide **25** (3.32 mg, 93%) as a white solid.

A 5 mM solution of **2** (2.34 mg, 0.01 mmol, 1 equiv) in anhydrous CH<sub>3</sub>CN (2 mL) was treated with cyclooctyne **22** (6.00 mg, 0.04 mmol, 4 equiv). No conversion was observed after 48 h.

A 5 mM solution of **2** (4.68 mg, 0.02 mmol, 1 equiv) and **24** (4.68 mg, 0.02 mmol, 1 equiv) in anhydrous CH<sub>3</sub>CN (4 mL) was treated with cyclooctyne **22** (3.00 mg, 0.02 mmol, 1 equiv). The mixture was stirred at 25 °C for 30 min, and the solvent was removed under a gentle stream of N<sub>2</sub>. The residue was purified by PTLC (SiO<sub>2</sub>, EtOAc) to provide **25** (6.96 mg, 98%) as a white solid.

### (c) Reaction with ynamine **16a**

A 40 mM solution of **2** (4.68 mg, 0.02 mmol, 1 equiv) in anhydrous CH<sub>3</sub>CN (0.5 mL) was treated with ynamine **16a** (3.33 mg, 0.03 mmol, 1.5 equiv). The mixture was stirred at 25 °C for 1 h, and the solvent was removed under a gentle stream of N<sub>2</sub>. The residue was purified by column chromatography (SiO<sub>2</sub>, 10% EtOAc/hexanes) to provide **17a** (5.72 mg, 90%) as a white solid.

A 40 mM solution of **24** (4.68 mg, 0.02 mmol, 1 equiv) in anhydrous CHCl<sub>3</sub>/CH<sub>3</sub>CN (V/V = 1:1, 0.5 mL) was treated with ynamine **16a** (3.33 mg, 0.03 mmol, 1.5 equiv). The mixture was stirred at 25 °C for 1 h, and the solvent was removed under a gentle stream of N<sub>2</sub>. The residue was purified by PTLC (SiO<sub>2</sub>, 50% EtOAc/hexanes) to provide **26** (6.05 mg, 95%) as a white solid.

A 20 mM solution of **2** (4.68 mg, 0.02 mmol, 1 equiv) and **24** (4.68 mg, 0.02 mmol, 1 equiv) in anhydrous CHCl<sub>3</sub>/CH<sub>3</sub>CN (V/V = 1:1, 1 mL) was treated with ynamine **16a** (2.22 mg, 0.02 mmol, 1.0 equiv). The mixture was stirred at 25 °C for 1 h, and the solvent was removed under a gentle

stream of N<sub>2</sub>. The mixture was analyzed by <sup>1</sup>H NMR using mesitylene as an internal standard, resulting a 15% NMR yield of **17a** and a 53% NMR yield of **26**.

## VI. LC-MS analysis of **2**

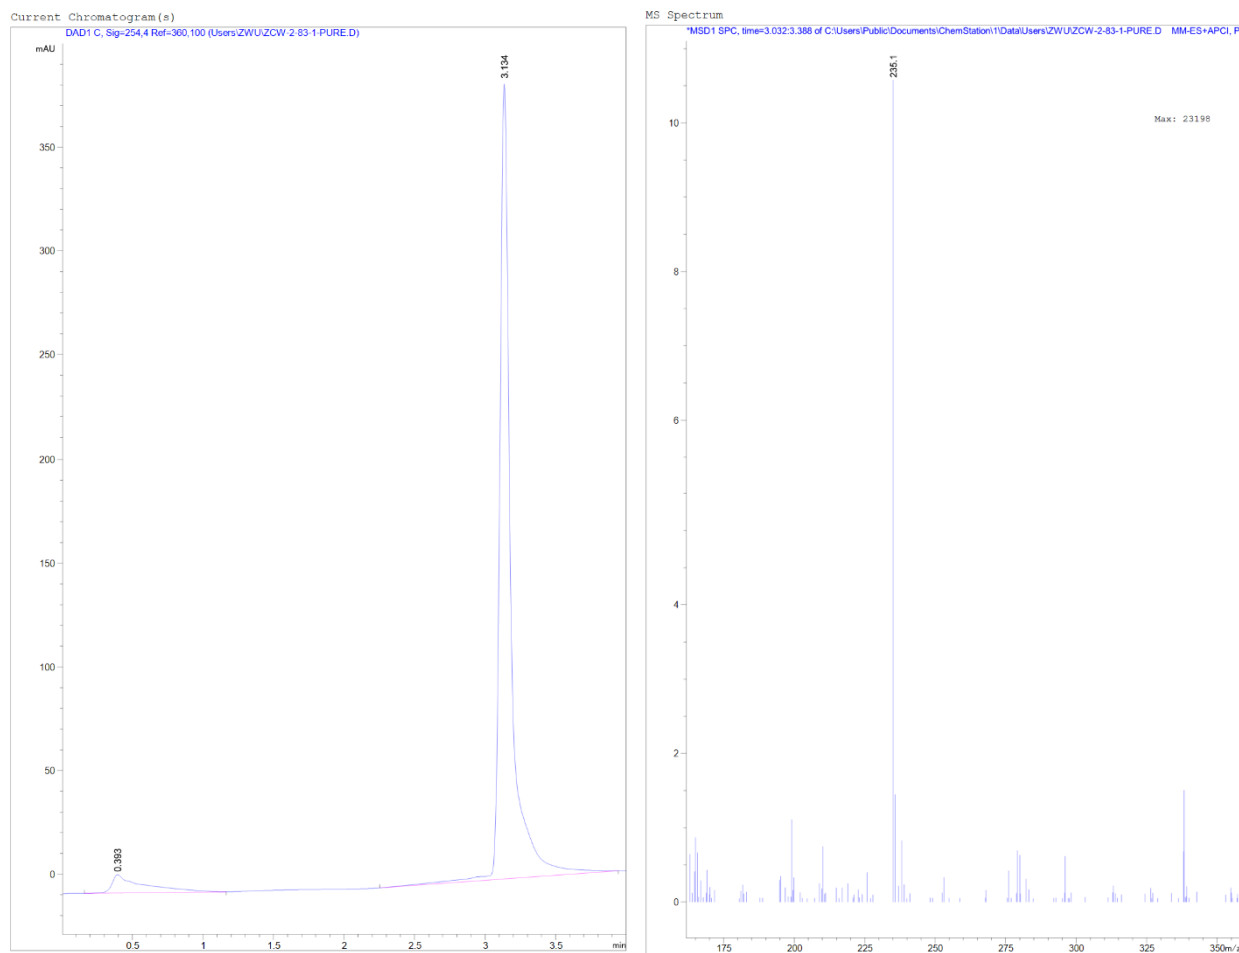

**Figure S1. LC trace (left) and MS spectra (right) of **2**.**

## VII. Decomposition kinetics of 2

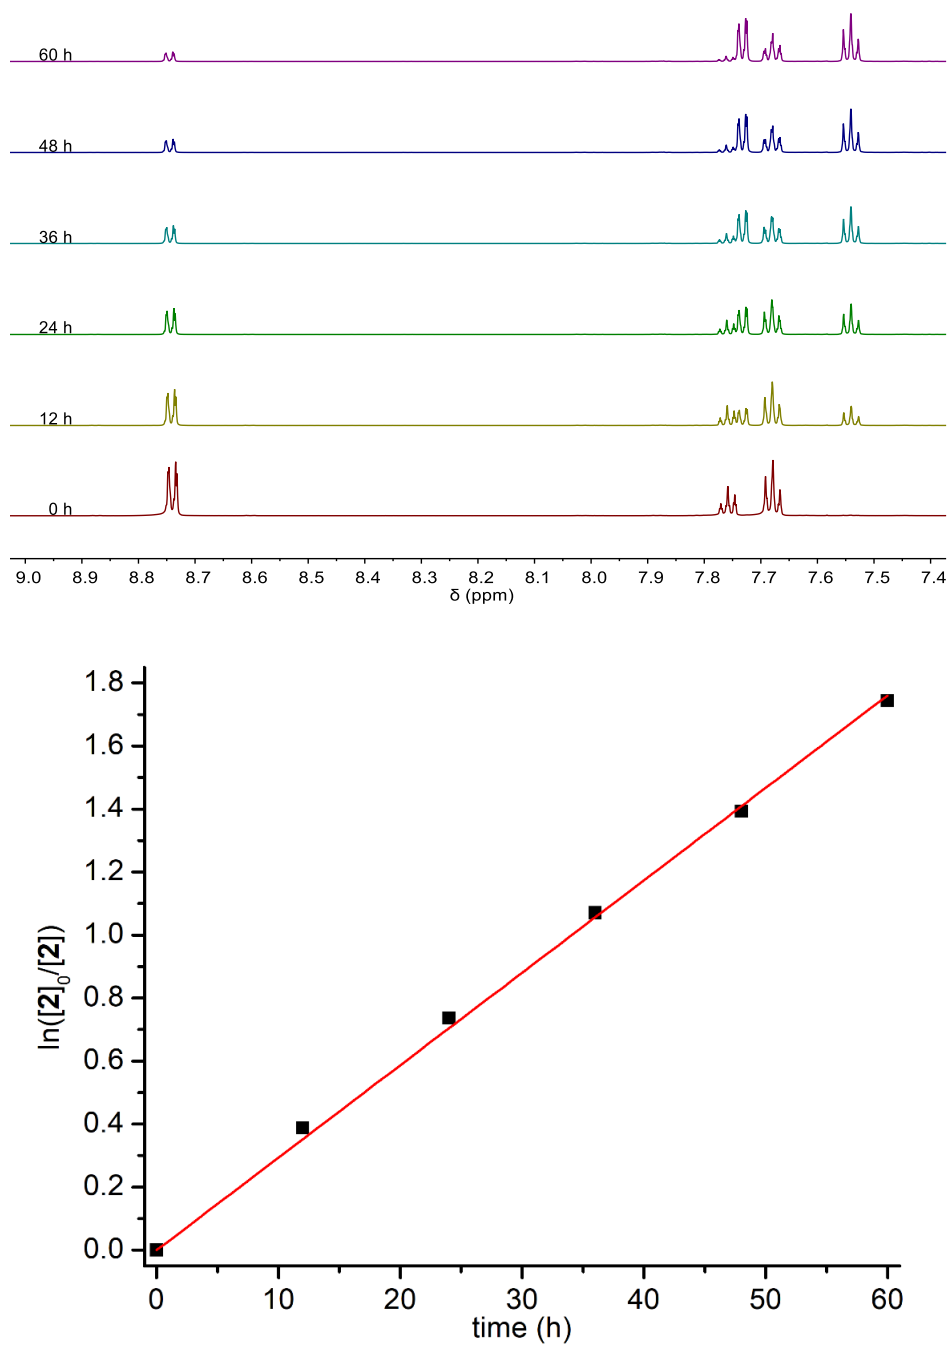

**Figure S2. Kinetic study of decomposition of 2 (top: NMR spectra; bottom: linear fitting).**

Experiment performed at 80 °C in CD<sub>3</sub>CN. <sup>1</sup>H NMR spectra is recorded at 12 h intervals for 60 h. First order kinetics with  $k = (0.0293 \pm 0.0003) \text{ h}^{-1}$  ( $8.15 \times 10^{-6} \text{ s}^{-1}$ ) was fitted with  $R^2 = 0.9995$ .

### VIII. Kinetic study of the reaction between 2 and 11k

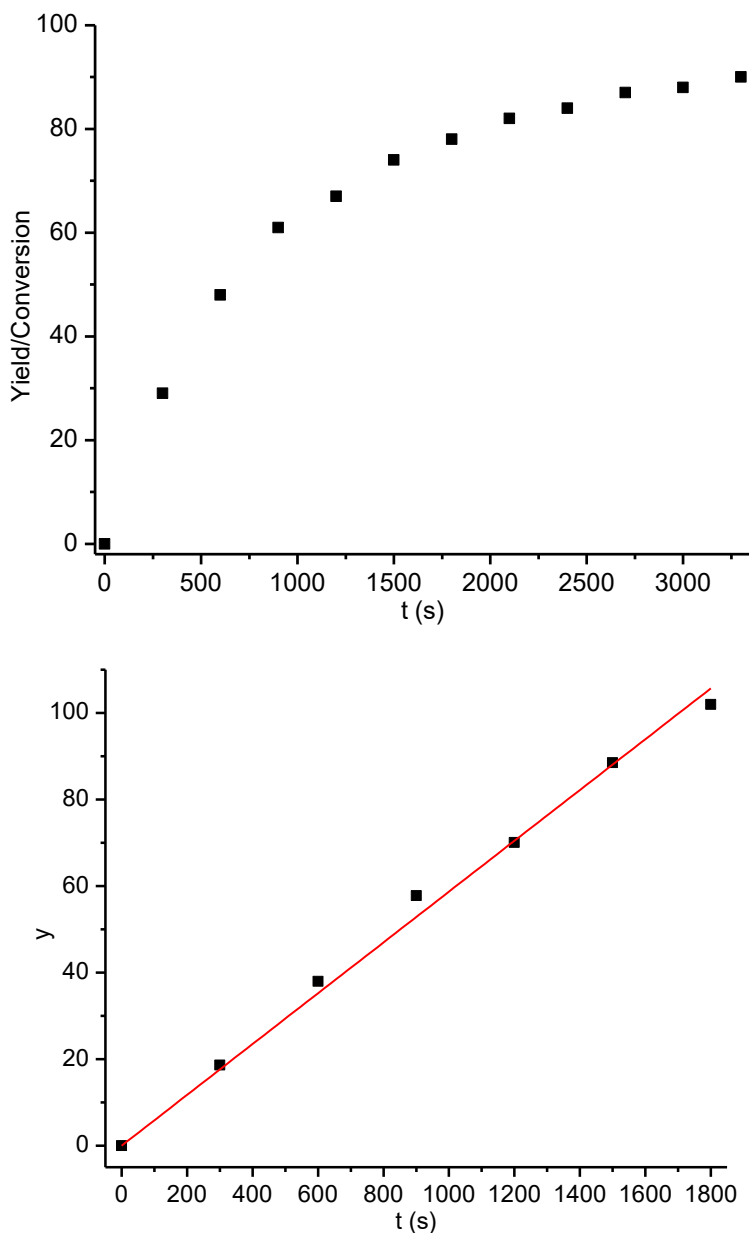

**Figure S3. Kinetic study of reaction between 2 and 11k (top: reaction progress over time; bottom: linear fitting).**

The kinetic study of the reaction between **2** (10 mM) and **11k** (20 mM) was conducted in  $\text{CD}_3\text{CN}$  at 25 °C.  $^1\text{H}$  NMR spectra was recorded at 5 min intervals for 55 min. The second order rate constant was fitted by the following equation with the result of  $k = (5.87 \pm 0.10) \cdot 10^{-2} \text{ M}^{-1} \cdot \text{s}^{-1}$  ( $R^2 = 0.9981$ ).

$$y = \frac{1}{[2]_0 - [11k]_0} \ln \frac{[11k]_0([2]_0 - [12k])}{[2]_0([11k]_0 - [12k])} = kt$$

## IX. <sup>15</sup>N labeling experiments

Amidine <sup>15</sup>N<sub>2</sub>-**11I** was prepared as reported.<sup>S5</sup> A 40 mM solution of **2** (4.68 mg, 0.02 mmol, 1 equiv) in anhydrous CH<sub>3</sub>CN (0.5 mL) was treated with <sup>15</sup>N<sub>2</sub>-**11I** (4.1 mg, 0.03 mmol, 1.5 equiv). The mixture was stirred at 25 °C for 2 h, and the solvent was removed under a gentle stream of N<sub>2</sub>. The residue was purified by PTLC (17% EtOAc/hexanes) to provide <sup>15</sup>N-**12I** (6.06 mg, 94%) as a white solid: <sup>1</sup>H NMR (600 MHz, CDCl<sub>3</sub>, 298K) δ 8.68–8.64 (m, 4H), 7.61–7.57 (m, 2H), 7.56–7.52 (m, 6H), 7.36 (t, *J* = 7.7 Hz, 2H), 7.29–7.26 (m, 1H), 4.34 (d, *J* = 2.5 Hz, 2H); <sup>13</sup>C NMR (151 MHz, CDCl<sub>3</sub>, 298K) δ 177.8 (d, *J* = 1.7 Hz), 171.1 (m), 136.8, 135.54, 135.53 (d, *J* = 8.4 Hz), 132.0, 129.0, 128.5, 128.1, 128.0, 126.3, 45.4 (d, *J* = 9.2 Hz); HRMS ESI-TOF *m/z* 325.1475 ([M + H]<sup>+</sup>, C<sub>22</sub>H<sub>17</sub>N<sub>2</sub>[<sup>15</sup>N] + H<sup>+</sup> requires 325.1466).

Determination of <sup>15</sup>N content by HRMS: The reaction was conducted twice. From each reaction, four samples in parallel were subjected to HRMS analysis, where the ratio of signal intensity (peak area) of C<sub>22</sub>H<sub>17</sub>N<sub>3</sub> (M + H<sup>+</sup>, 324), C<sub>22</sub>H<sub>17</sub>N<sub>2</sub>[<sup>15</sup>N] (M + H<sup>+</sup>, 325), and C<sub>22</sub>H<sub>17</sub>N[<sup>15</sup>N<sub>2</sub>] was used to determine the <sup>15</sup>N content in the reaction product with the existence of natural occurring isotopes taken into account. Synthetic C<sub>22</sub>H<sub>17</sub>N<sub>3</sub> was also subjected to HRMS analysis as a control. The results are listed in Table S3. A 1.07–1.08 ratio of <sup>15</sup>N incorporation was determined by HRMS.

**Table S3. HRMS analysis of <sup>15</sup>N labeling experiment.**

| Compound                    | Sample       | <i>m/z</i> = 324 | <i>m/z</i> = 325 | <i>m/z</i> = 326 |      |
|-----------------------------|--------------|------------------|------------------|------------------|------|
| <sup>15</sup> N- <b>12I</b> | 1            | 0.7%             | 91.2%            | 8.1%             |      |
|                             | 2            | 0.6%             | 90.3%            | 9.1%             |      |
|                             | Experiment 1 | 3                | 0.6%             | 91.7%            | 7.7% |
|                             | 4            | 0.6%             | 91.1%            | 8.3%             |      |
|                             | Average      | 0.6%             | 91.1%            | 8.3%             |      |
|                             | 1            | 0.9%             | 92.1%            | 6.9%             |      |
|                             | 2            | 0.7%             | 93.0%            | 6.3%             |      |
|                             | Experiment 2 | 3                | 0.9%             | 91.7%            | 7.5% |
|                             | 4            | 0.6%             | 92.1%            | 7.3%             |      |
|                             | Average      | 0.8%             | 92.2%            | 7.0%             |      |
| <b>12I</b>                  | 1            | 100.2%           | 0.2%             | -0.4%            |      |
|                             | 2            | 100.9%           | -0.5%            | -0.3%            |      |
|                             | 3            | 99.7%            | 0.8%             | -0.4%            |      |
|                             | 4            | 100.0%           | 0.5%             | -0.5%            |      |
|                             | Average      | 100.2%           | 0.2%             | -0.4%            |      |



The potential impact of the  $^{15}\text{NH}_3$  released in the cycloaddition was also investigated, where no  $^{15}\text{N}$  incorporation was observed when triazine **12I** or the reaction between **2** and **11I** was treated with excess  $^{15}\text{NH}_3$ . This observation indicates that the incorporation of  $^{15}\text{N}$  only results from the reaction between tetrazine **2** and amidine  $^{15}\text{N}_2$ -**11I**.

Determination of  $^{15}\text{N}$  content by  $^{13}\text{C}$  NMR:

$^{13}\text{C}$  NMR of the labeling reaction product was recorded and the signal of  $^{13}\text{C(a)}$  ( $\delta$  135.5 ppm) was analyzed (Figure S4). A singlet (center) was observed when no  $^2J(^{13}\text{C}-^{15}\text{N})$  is present, representing a  $^{13}\text{C}$  close to a  $^{14}\text{N}$ . A doublet (sides) was also observed where  $^2J(^{13}\text{C}-^{15}\text{N}, 8.4 \text{ Hz})$  is present, representing a  $^{13}\text{C}$  close to a  $^{15}\text{N}$ . The ratio between the intensity of the singlet and doublet was determined and provided the presence of  $^{14}\text{N}$  (47%) and  $^{15}\text{N}$  (53%). A 1.06 ratio of  $^{15}\text{N}$  incorporation was determined by NMR.

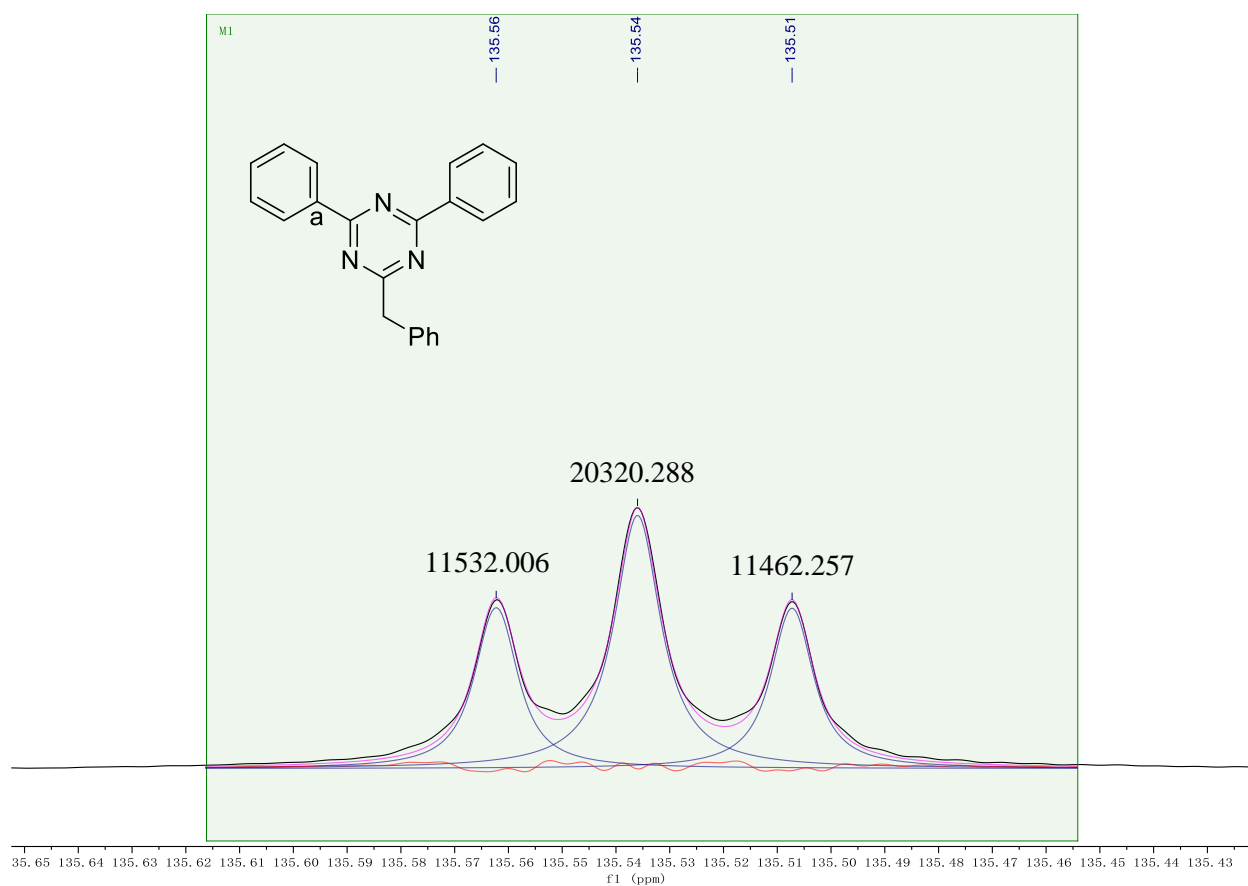

**Figure S4. Determination of  $^{15}\text{N}$  incorporation by  $^{13}\text{C}$  NMR.**

## X. X-ray crystal data and structure refinement for 8, 10 and 2

### X-ray information for 8

Crystal data and structure refinement for 8.

|                                   |                                                                                                                  |
|-----------------------------------|------------------------------------------------------------------------------------------------------------------|
| Empirical formula                 | C <sub>53</sub> H <sub>33</sub> Cl <sub>3</sub> N <sub>16</sub> O <sub>16</sub>                                  |
| Molecular formula                 | 2(C <sub>26</sub> H <sub>16</sub> N <sub>8</sub> O <sub>8</sub> ), C <sub>1</sub> H <sub>1</sub> Cl <sub>3</sub> |
| Formula weight                    | 1256.30                                                                                                          |
| Temperature                       | 100.0 K                                                                                                          |
| Wavelength                        | 0.71073 Å                                                                                                        |
| Crystal system                    | Monoclinic                                                                                                       |
| Space group                       | P 1 21/n 1                                                                                                       |
| Unit cell dimensions              | a = 13.2215(4) Å      α = 90°.<br>b = 31.0295(7) Å      β = 115.2070(10)°.<br>c = 14.5700(4) Å      γ = 90°.     |
| Volume                            | 5408.2(3) Å <sup>3</sup>                                                                                         |
| Z                                 | 4                                                                                                                |
| Density (calculated)              | 1.543 Mg/m <sup>3</sup>                                                                                          |
| Absorption coefficient            | 0.259 mm <sup>-1</sup>                                                                                           |
| F(000)                            | 2568                                                                                                             |
| Crystal size                      | 0.15 x 0.125 x 0.125 mm <sup>3</sup>                                                                             |
| Crystal color, habit              | orange block                                                                                                     |
| Theta range for data collection   | 1.312 to 25.349°.                                                                                                |
| Index ranges                      | -15 ≤ h ≤ 15, -37 ≤ k ≤ 36, -17 ≤ l ≤ 16                                                                         |
| Reflections collected             | 59891                                                                                                            |
| Independent reflections           | 9895 [R(int) = 0.0447]                                                                                           |
| Completeness to theta = 25.242°   | 100.0 %                                                                                                          |
| Absorption correction             | Semi-empirical from equivalents                                                                                  |
| Max. and min. transmission        | 0.4903 and 0.4553                                                                                                |
| Refinement method                 | Full-matrix least-squares on F <sup>2</sup>                                                                      |
| Data / restraints / parameters    | 9895 / 6 / 806                                                                                                   |
| Goodness-of-fit on F <sup>2</sup> | 1.020                                                                                                            |
| Final R indices [I > 2σ(I)]       | R1 = 0.0496, wR2 = 0.1173                                                                                        |
| R indices (all data)              | R1 = 0.0700, wR2 = 0.1285                                                                                        |
| Largest diff. peak and hole       | 1.110 and -0.999 e.Å <sup>-3</sup>                                                                               |

## X-ray information for 10

Crystal data and structure refinement for 10.

|                                   |                                                                                                                                  |
|-----------------------------------|----------------------------------------------------------------------------------------------------------------------------------|
| Empirical formula                 | C19 H20 N4 O2                                                                                                                    |
| Formula weight                    | 336.39                                                                                                                           |
| Temperature                       | 100.0 K                                                                                                                          |
| Wavelength                        | 0.71073 Å                                                                                                                        |
| Crystal system                    | Monoclinic                                                                                                                       |
| Space group                       | P 21/n                                                                                                                           |
| Unit cell dimensions              | a = 13.3231(7) Å $\alpha = 90^\circ$ .<br>b = 9.9116(6) Å $\beta = 104.338(3)^\circ$ .<br>c = 14.2356(7) Å $\gamma = 90^\circ$ . |
| Volume                            | 1821.30(17) Å <sup>3</sup>                                                                                                       |
| Z                                 | 4                                                                                                                                |
| Density (calculated)              | 1.227 Mg/m <sup>3</sup>                                                                                                          |
| Absorption coefficient            | 0.082 mm <sup>-1</sup>                                                                                                           |
| F(000)                            | 712                                                                                                                              |
| Crystal size                      | 0.25 x 0.17 x 0.1 mm <sup>3</sup>                                                                                                |
| Crystal color, habit              | yellow block                                                                                                                     |
| Theta range for data collection   | 2.954 to 28.301°.                                                                                                                |
| Index ranges                      | -17 ≤ h ≤ 17, -11 ≤ k ≤ 13, -18 ≤ l ≤ 18                                                                                         |
| Reflections collected             | 14723                                                                                                                            |
| Independent reflections           | 4497 [R(int) = 0.0437]                                                                                                           |
| Completeness to theta = 25.242°   | 99.8 %                                                                                                                           |
| Absorption correction             | Semi-empirical from equivalents                                                                                                  |
| Max. and min. transmission        | 0.7457 and 0.6822                                                                                                                |
| Refinement method                 | Full-matrix least-squares on F <sup>2</sup>                                                                                      |
| Data / restraints / parameters    | 4497 / 0 / 229                                                                                                                   |
| Goodness-of-fit on F <sup>2</sup> | 1.013                                                                                                                            |
| Final R indices [I > 2σ(I)]       | R1 = 0.0474, wR2 = 0.0984                                                                                                        |
| R indices (all data)              | R1 = 0.0793, wR2 = 0.1116                                                                                                        |
| Extinction coefficient            | n/a                                                                                                                              |
| Largest diff. peak and hole       | 0.334 and -0.341 e.Å <sup>-3</sup>                                                                                               |

## X-ray information for 2

Crystal data and structure refinement for 2.

|                                   |                                                                                                 |
|-----------------------------------|-------------------------------------------------------------------------------------------------|
| Empirical formula                 | C <sub>14</sub> H <sub>10</sub> N <sub>4</sub>                                                  |
| Molecular formula                 | C <sub>14</sub> H <sub>10</sub> N <sub>4</sub>                                                  |
| Formula weight                    | 234.26                                                                                          |
| Temperature                       | 100.0 K                                                                                         |
| Wavelength                        | 0.71073 Å                                                                                       |
| Crystal system                    | Orthorhombic                                                                                    |
| Space group                       | P2 <sub>1</sub> 2 <sub>1</sub> 2 <sub>1</sub>                                                   |
| Unit cell dimensions              | a = 3.8362(5) Å      α = 90°.<br>b = 13.7755(18) Å    β = 90°.<br>c = 20.821(2) Å      γ = 90°. |
| Volume                            | 1100.3(2) Å <sup>3</sup>                                                                        |
| Z                                 | 4                                                                                               |
| Density (calculated)              | 1.414 Mg/m <sup>3</sup>                                                                         |
| Absorption coefficient            | 0.089 mm <sup>-1</sup>                                                                          |
| F(000)                            | 488                                                                                             |
| Crystal size                      | 0.25 x 0.04 x 0.04 mm <sup>3</sup>                                                              |
| Crystal color, habit              | yellow needle                                                                                   |
| Theta range for data collection   | 1.773 to 25.661°.                                                                               |
| Index ranges                      | -4 ≤ h ≤ 4, -16 ≤ k ≤ 16, -25 ≤ l ≤ 15                                                          |
| Reflections collected             | 7200                                                                                            |
| Independent reflections           | 2090 [R(int) = 0.0520]                                                                          |
| Completeness to theta = 25.242°   | 99.8 %                                                                                          |
| Absorption correction             | Semi-empirical from equivalents                                                                 |
| Max. and min. transmission        | 0.7454 and 0.6903                                                                               |
| Refinement method                 | Full-matrix least-squares on F <sup>2</sup>                                                     |
| Data / restraints / parameters    | 2090 / 0 / 163                                                                                  |
| Goodness-of-fit on F <sup>2</sup> | 1.002                                                                                           |
| Final R indices [I > 2σ(I)]       | R1 = 0.0475, wR2 = 0.0842                                                                       |
| R indices (all data)              | R1 = 0.0825, wR2 = 0.0949                                                                       |
| Largest diff. peak and hole       | 0.181 and -0.193 e.Å <sup>-3</sup>                                                              |

## XI. Differential Scanning Calorimetry Characterization of 8 and 2

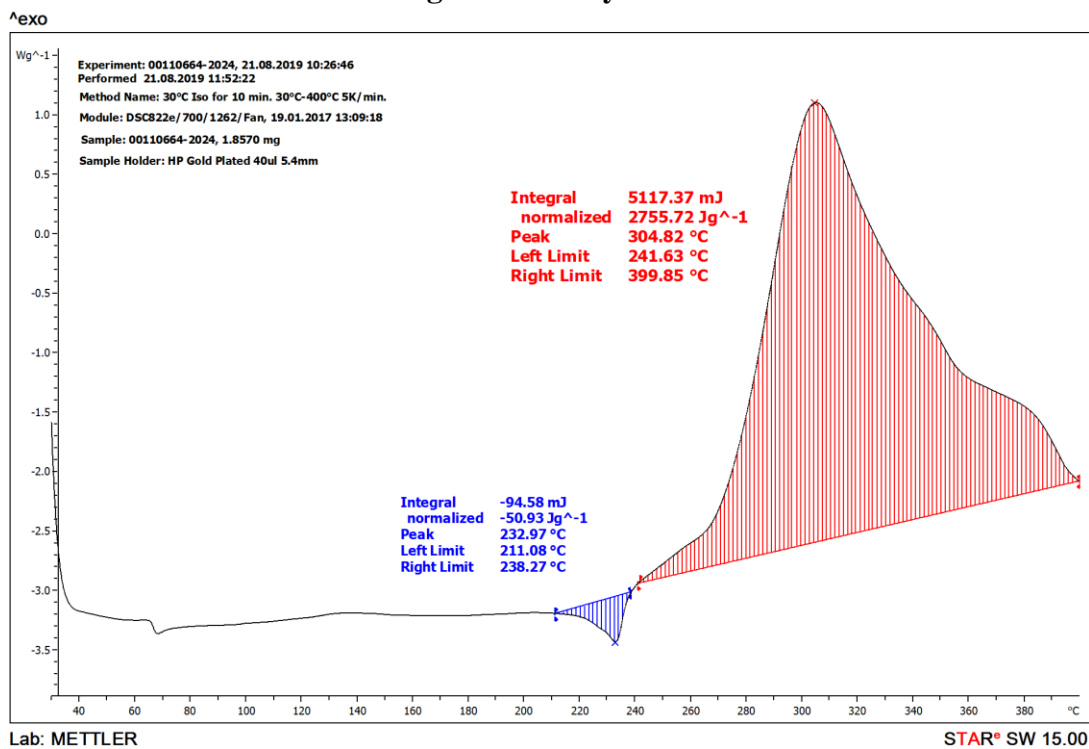

Figure S5. DSC measurement of compound 8.

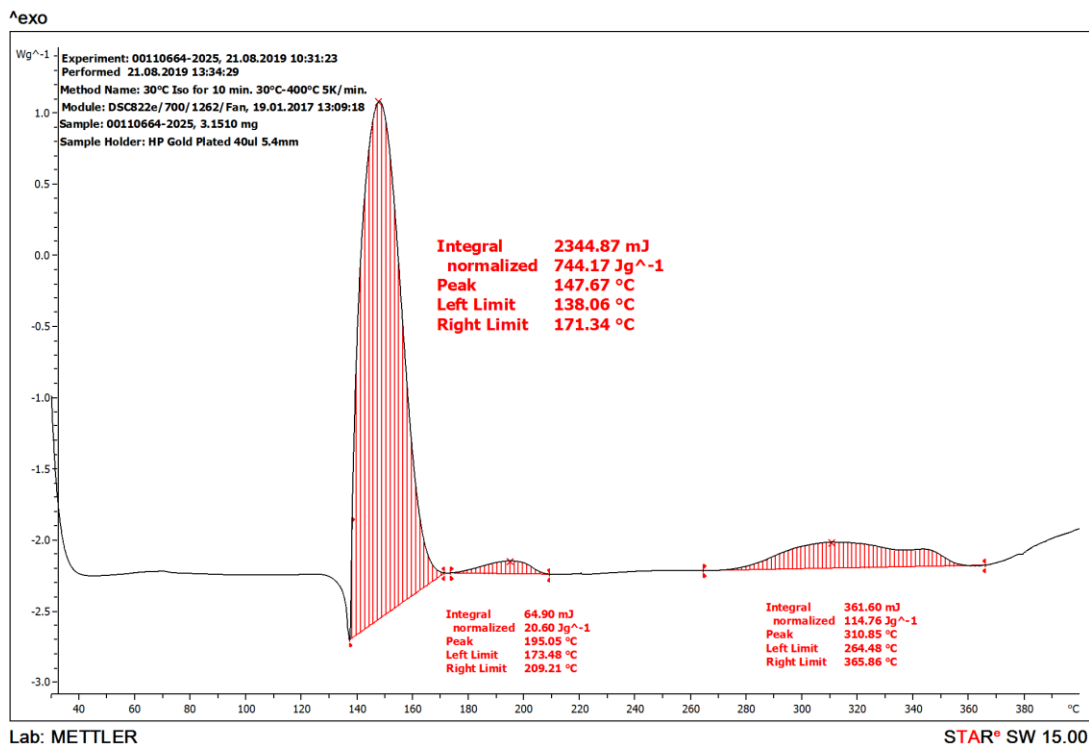

Figure S6. DSC measurement of compound 2.

## XII. References

- S1. (a) Zhao, X.; Liu, D.; Xie, F.; Zhang, W. *Tetrahedron* **2009**, *65*, 512. (b) Taylor, E. C.; Dumas, D. J. *J. Org. Chem.* **1981**, *46*, 1394. (c) White, W. A.; Weingarten, H. *J. Org. Chem.* **1967**, *32*, 213. (d) Carlson, R.; Nilsson, A. *Acta Chim. Scand.* **1984**, *38b*, 49. (e) Verkruijsse, H.; Bos, H.; de Noten, L.; Brandsma, L. *J. Royal Netherlands Chem. Soc.* **1981**, *100*, 244. (f) Ireland, R. E.; Anderson, R. C.; Badoud, R.; Fitzsimmons, B. J.; McGarvey, G. J.; Thairivongs, S.; Wilcox, C. S. *J. Am. Chem. Soc.* **1983**, *105*, 1988.
- S2. Gaussian 09, Revision C.01, M. J. Frisch, G. W. Trucks, H. B. Schlegel, G. E. Scuseria, M. A. Robb, J. R. Cheeseman, G. Scalmani, V. Barone, G. A. Petersson, H. Nakatsuji, X. Li, M. Caricato, A. Marenich, J. Bloino, B. G. Janesko, R. Gomperts, B. Mennucci, H. P. Hratchian, J. V. Ortiz, A. F. Izmaylov, J. L. Sonnenberg, D. Williams-Young, F. Ding, F. Lipparini, F. Egidi, J. Goings, B. Peng, A. Petrone, T. Henderson, D. Ranasinghe, V. G. Zakrzewski, J. Gao, N. Rega, G. Zheng, W. Liang, M. Hada, M. Ehara, K. Toyota, R. Fukuda, J. Hasegawa, M. Ishida, T. Nakajima, Y. Honda, O. Kitao, H. Nakai, T. Vreven, K. Throssell, J. A. Montgomery, Jr., J. E. Peralta, F. Ogliaro, M. Bearpark, J. J. Heyd, E. Brothers, K. N. Kudin, V. N. Staroverov, T. Keith, R. Kobayashi, J. Normand, K. Raghavachari, A. Rendell, J. C. Burant, S. S. Iyengar, J. Tomasi, M. Cossi, J. M. Millam, M. Klene, C. Adamo, R. Cammi, J. W. Ochterski, R. L. Martin, K. Morokuma, O. Farkas, J. B. Foresman, and D. J. Fox, Gaussian, Inc., Wallingford CT, 2016.
- S3. (a) Butler, R. N.; Cunningham, D.; McArdle, P.; O'Halloran, G. A. *J. Chem. Soc., Chem. Commun.* **1988**, *3*, 232. (b) Butler, R. N.; Evans, A. M.; McNeela, E. M.; Cunningham, D.; McArdle, P. *J. Chem. Soc. Perkin Trans. 1.* **1990**, 2527.
- S4. Muathen, H. A. *Indian J. Chem.* **1991**, *30B*, 521.
- S5. Charushin, V. N.; van der Plas, H. C. *J. Org. Chem.* **1983**, *48*, 2667.

## XIII. Spectra

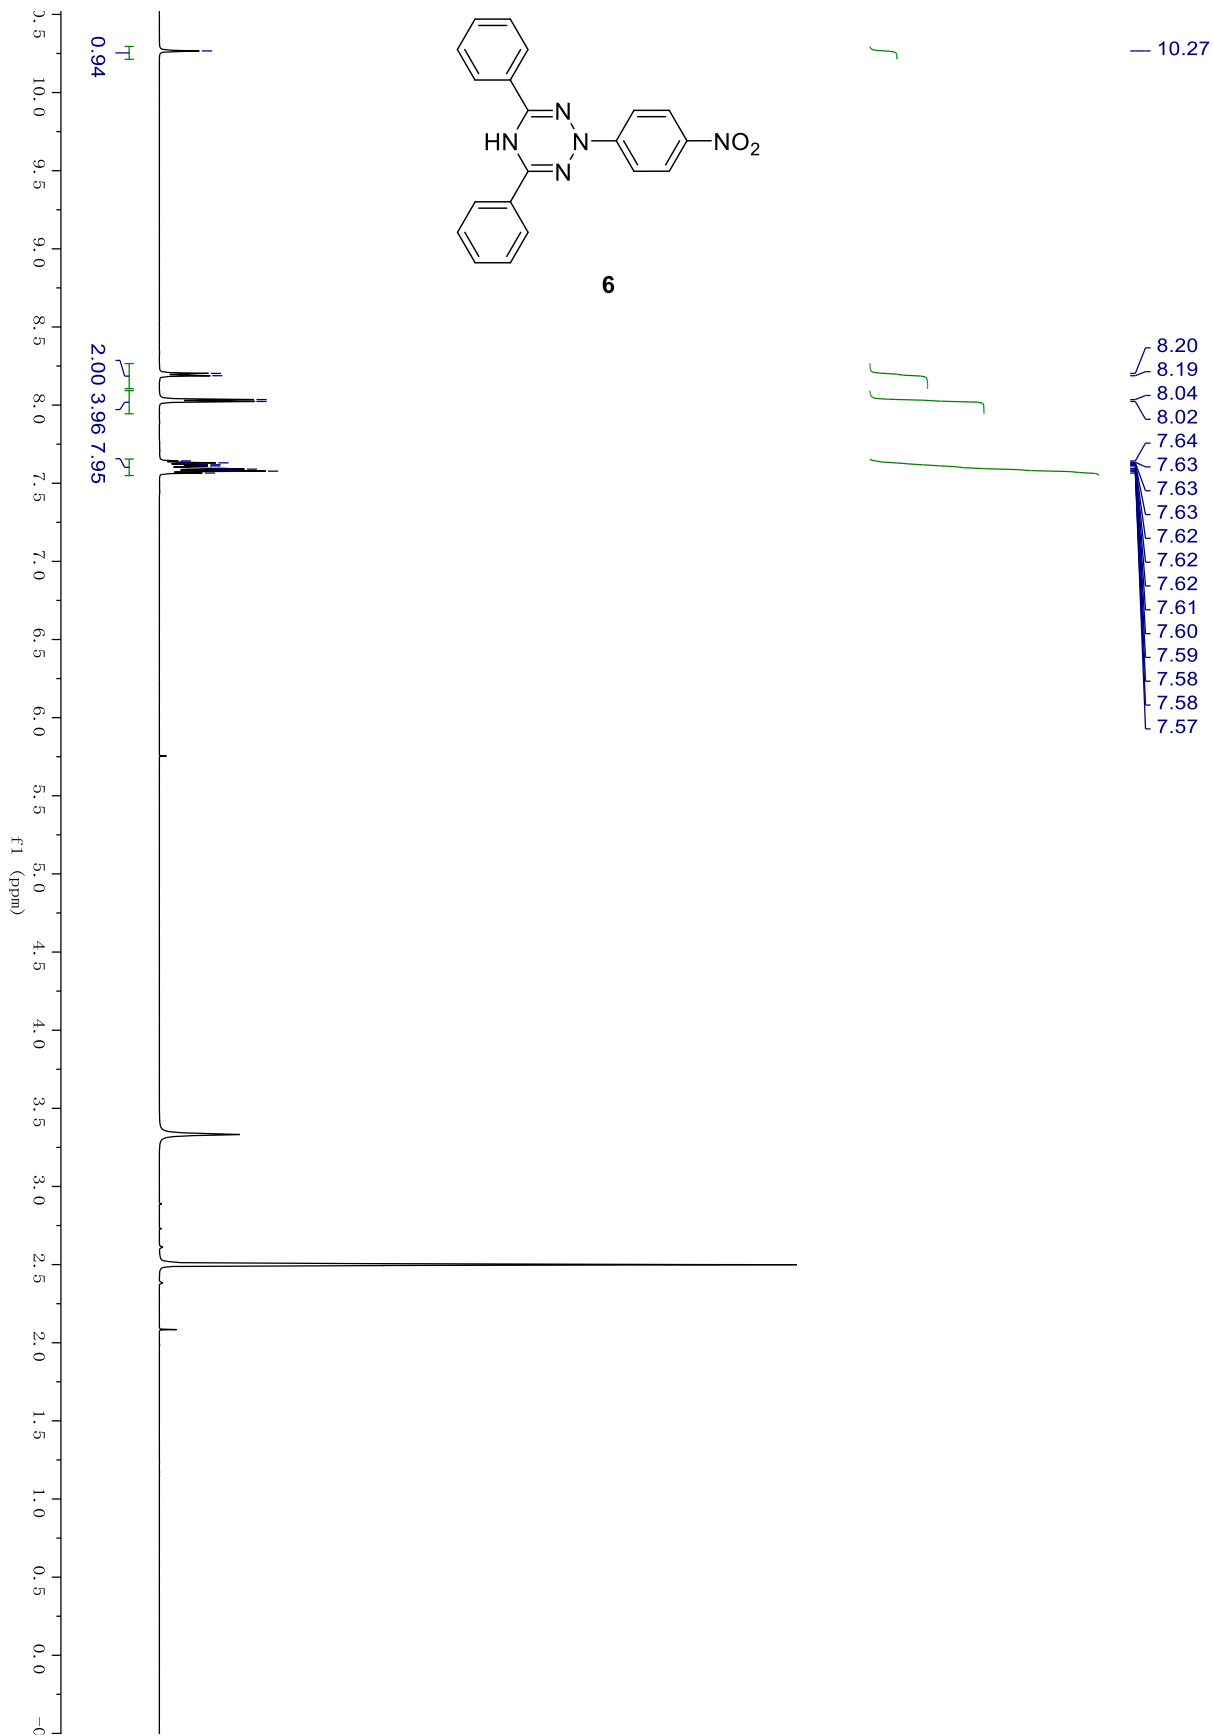

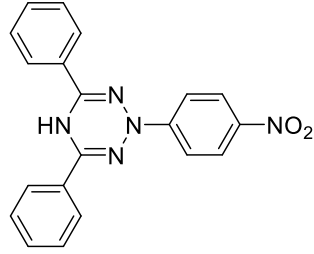

**6**

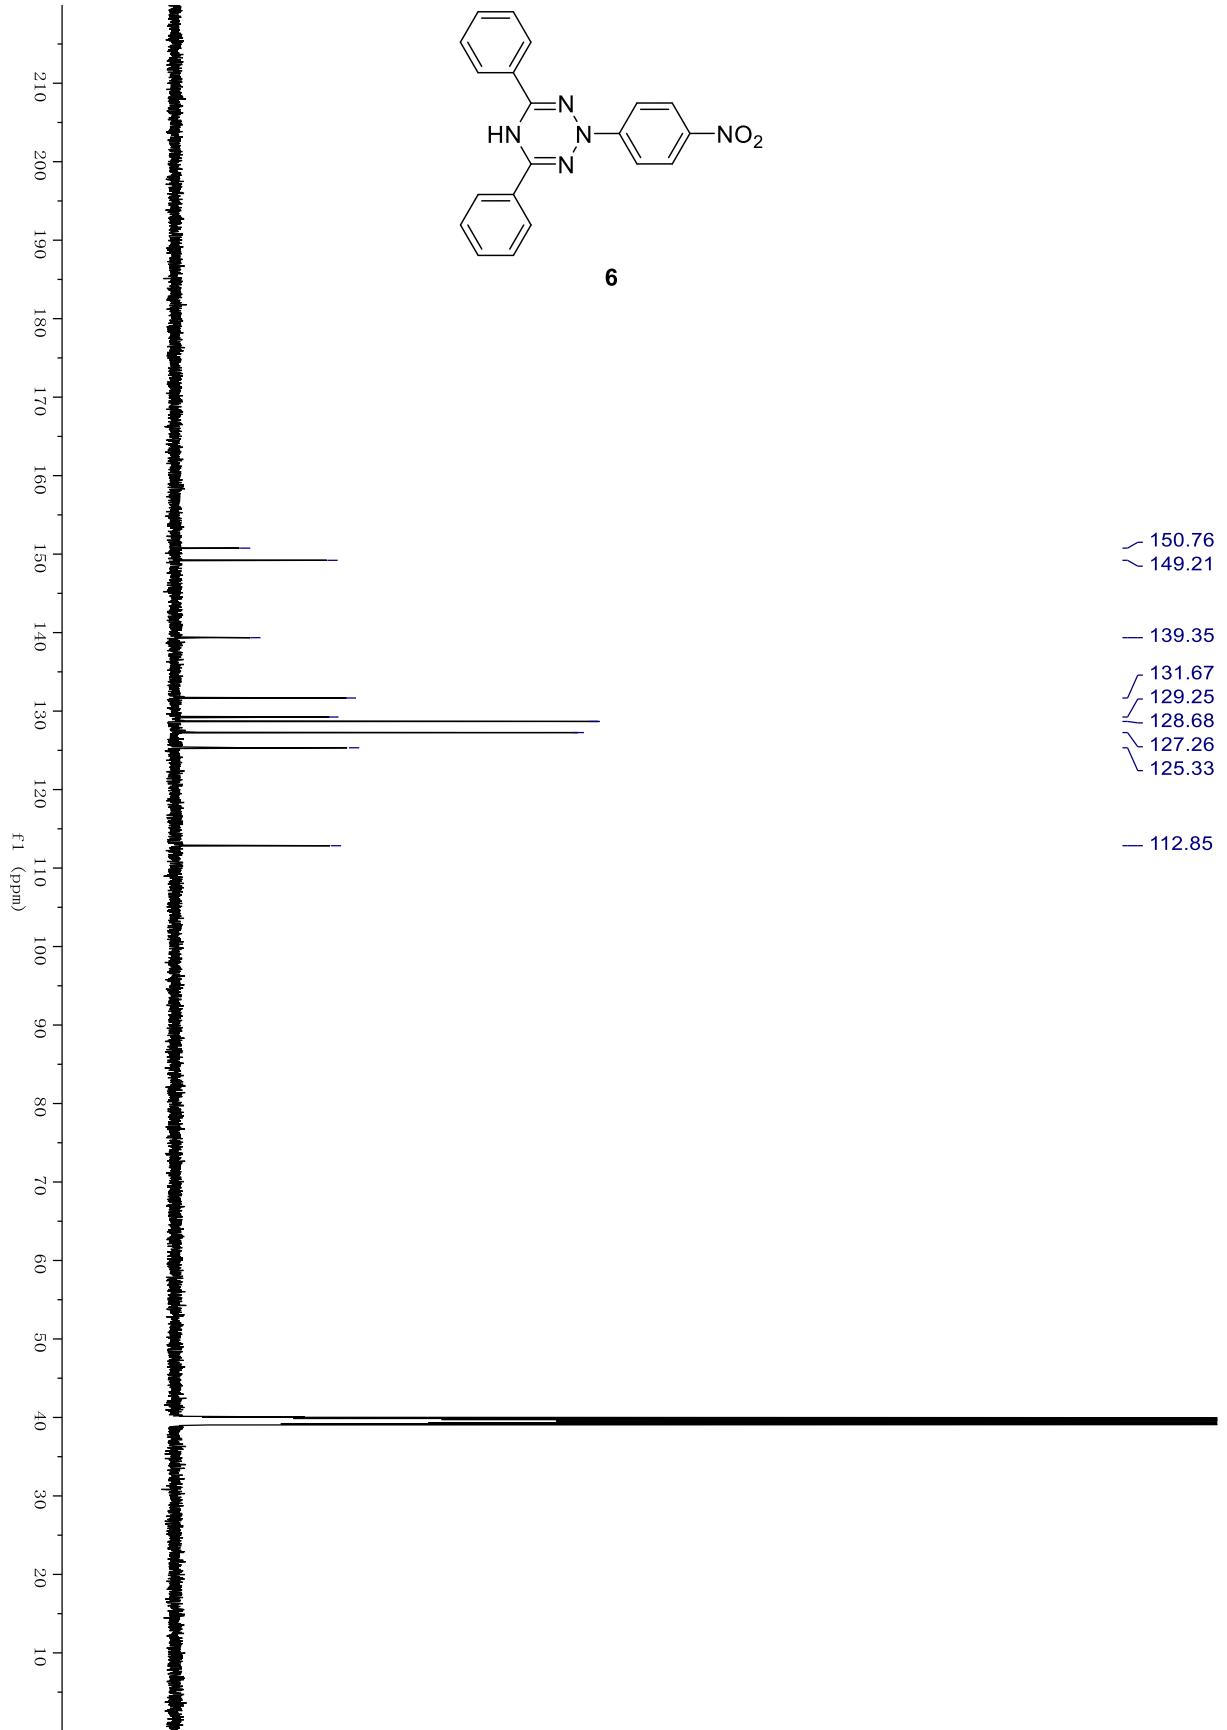



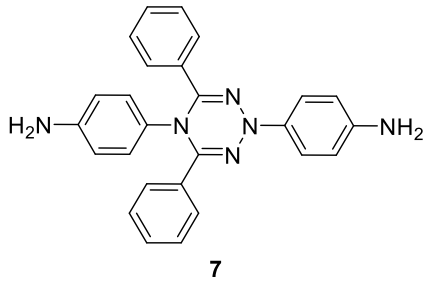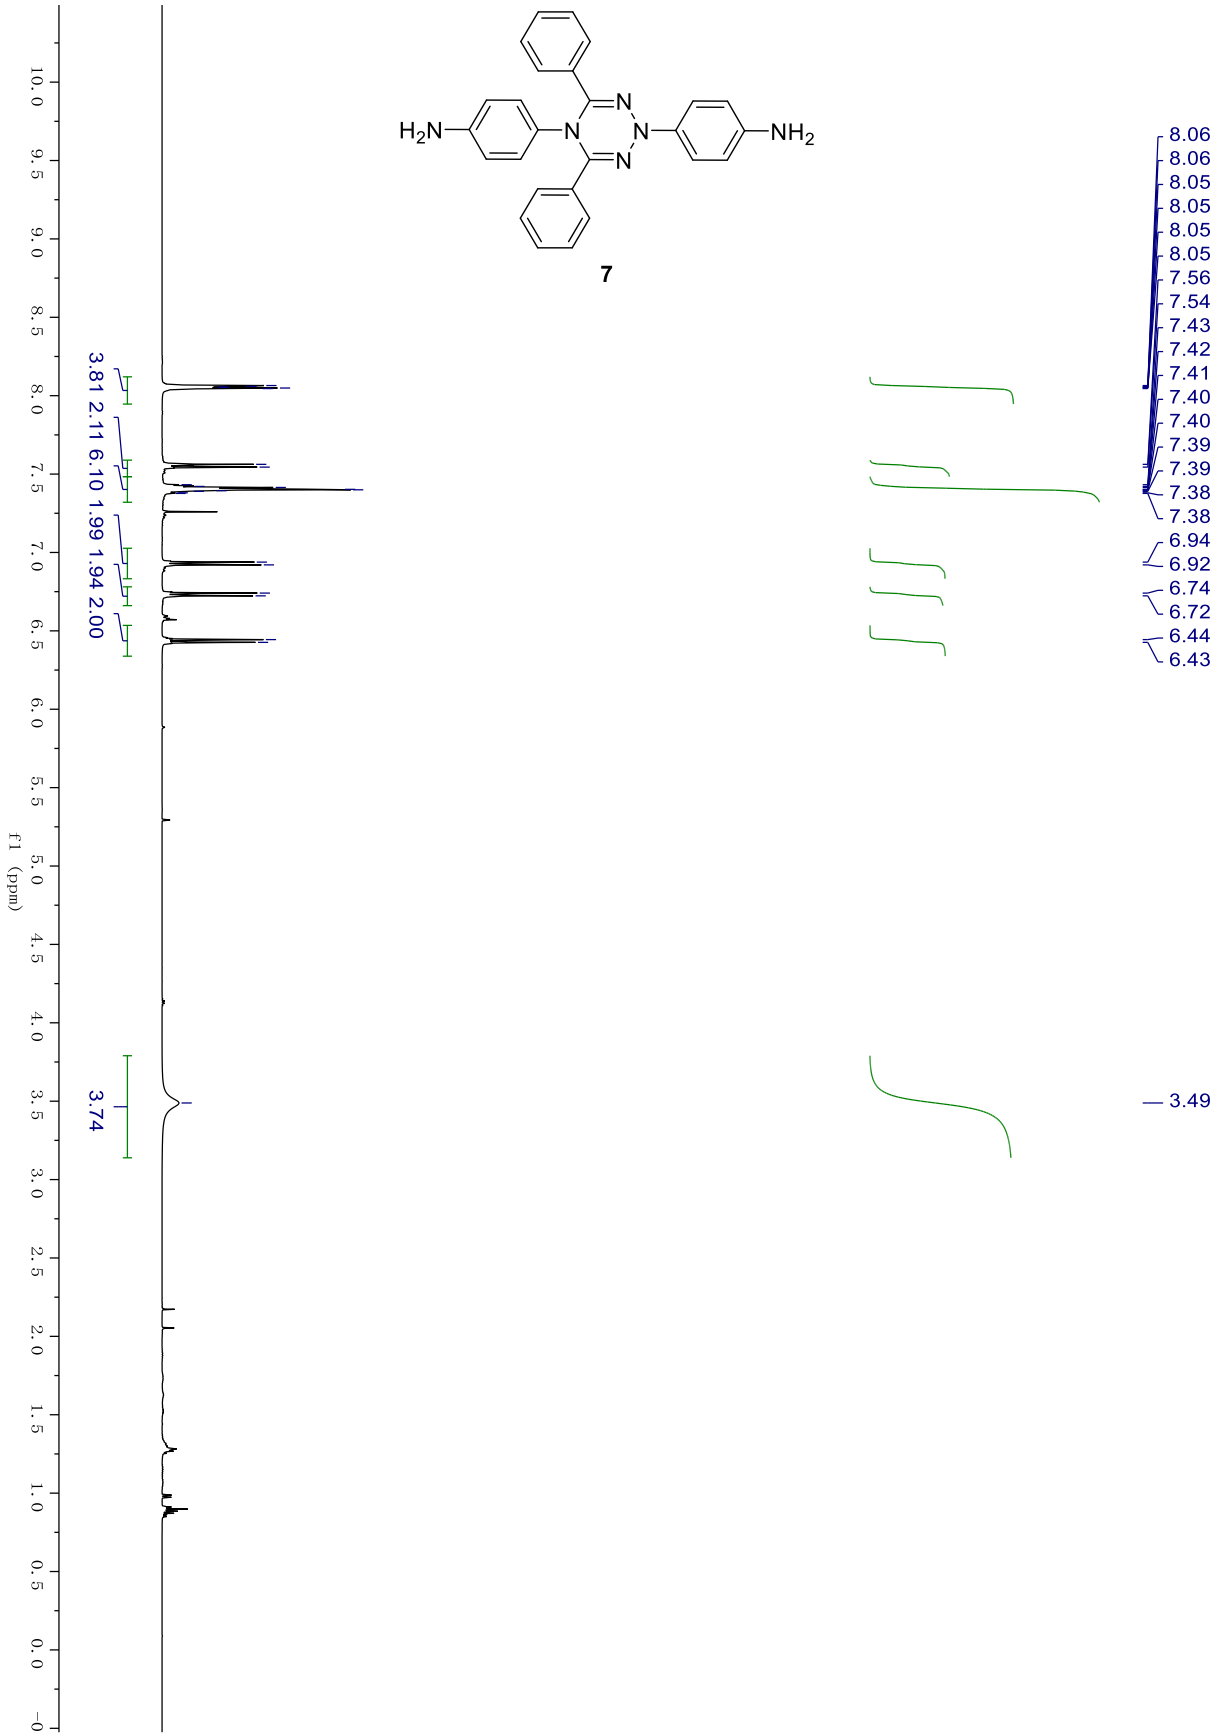

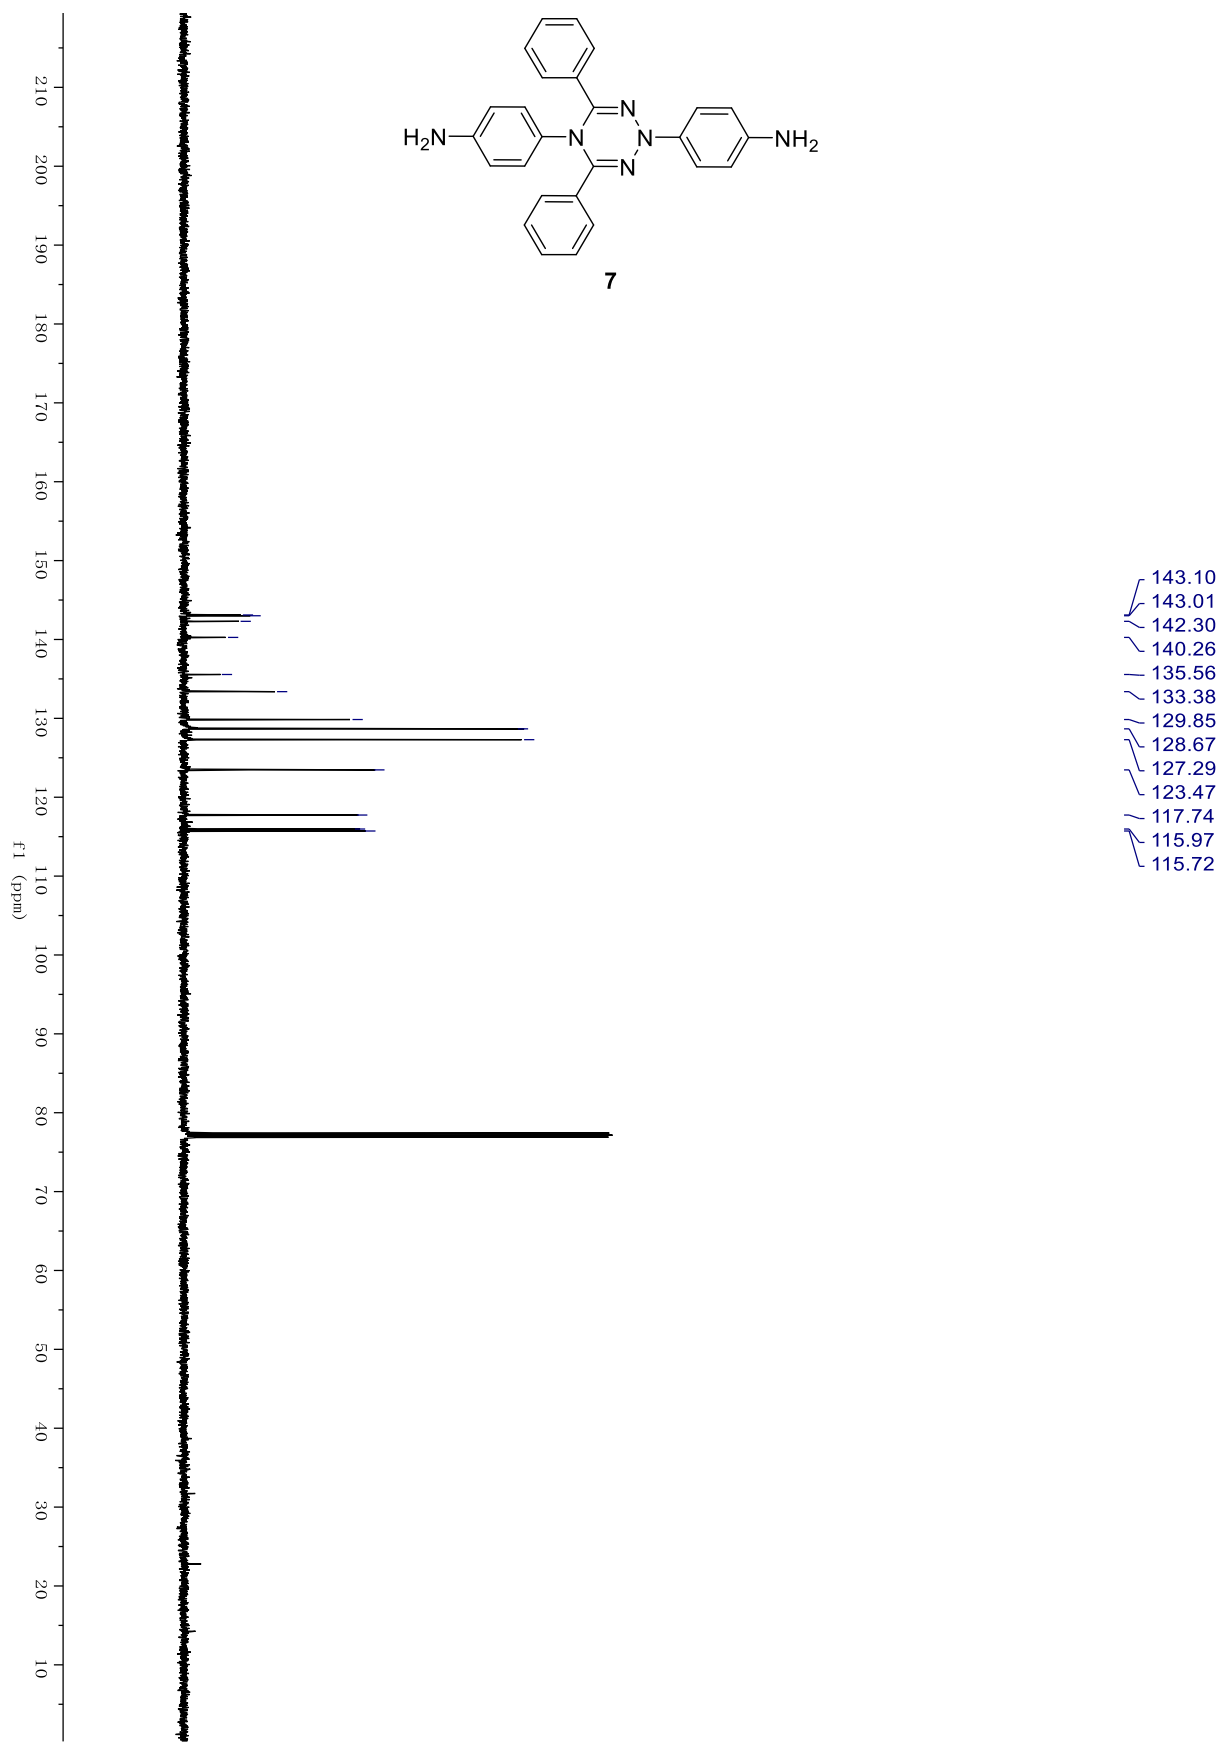

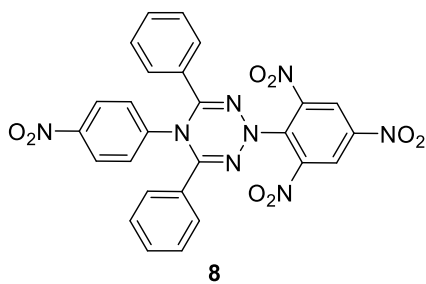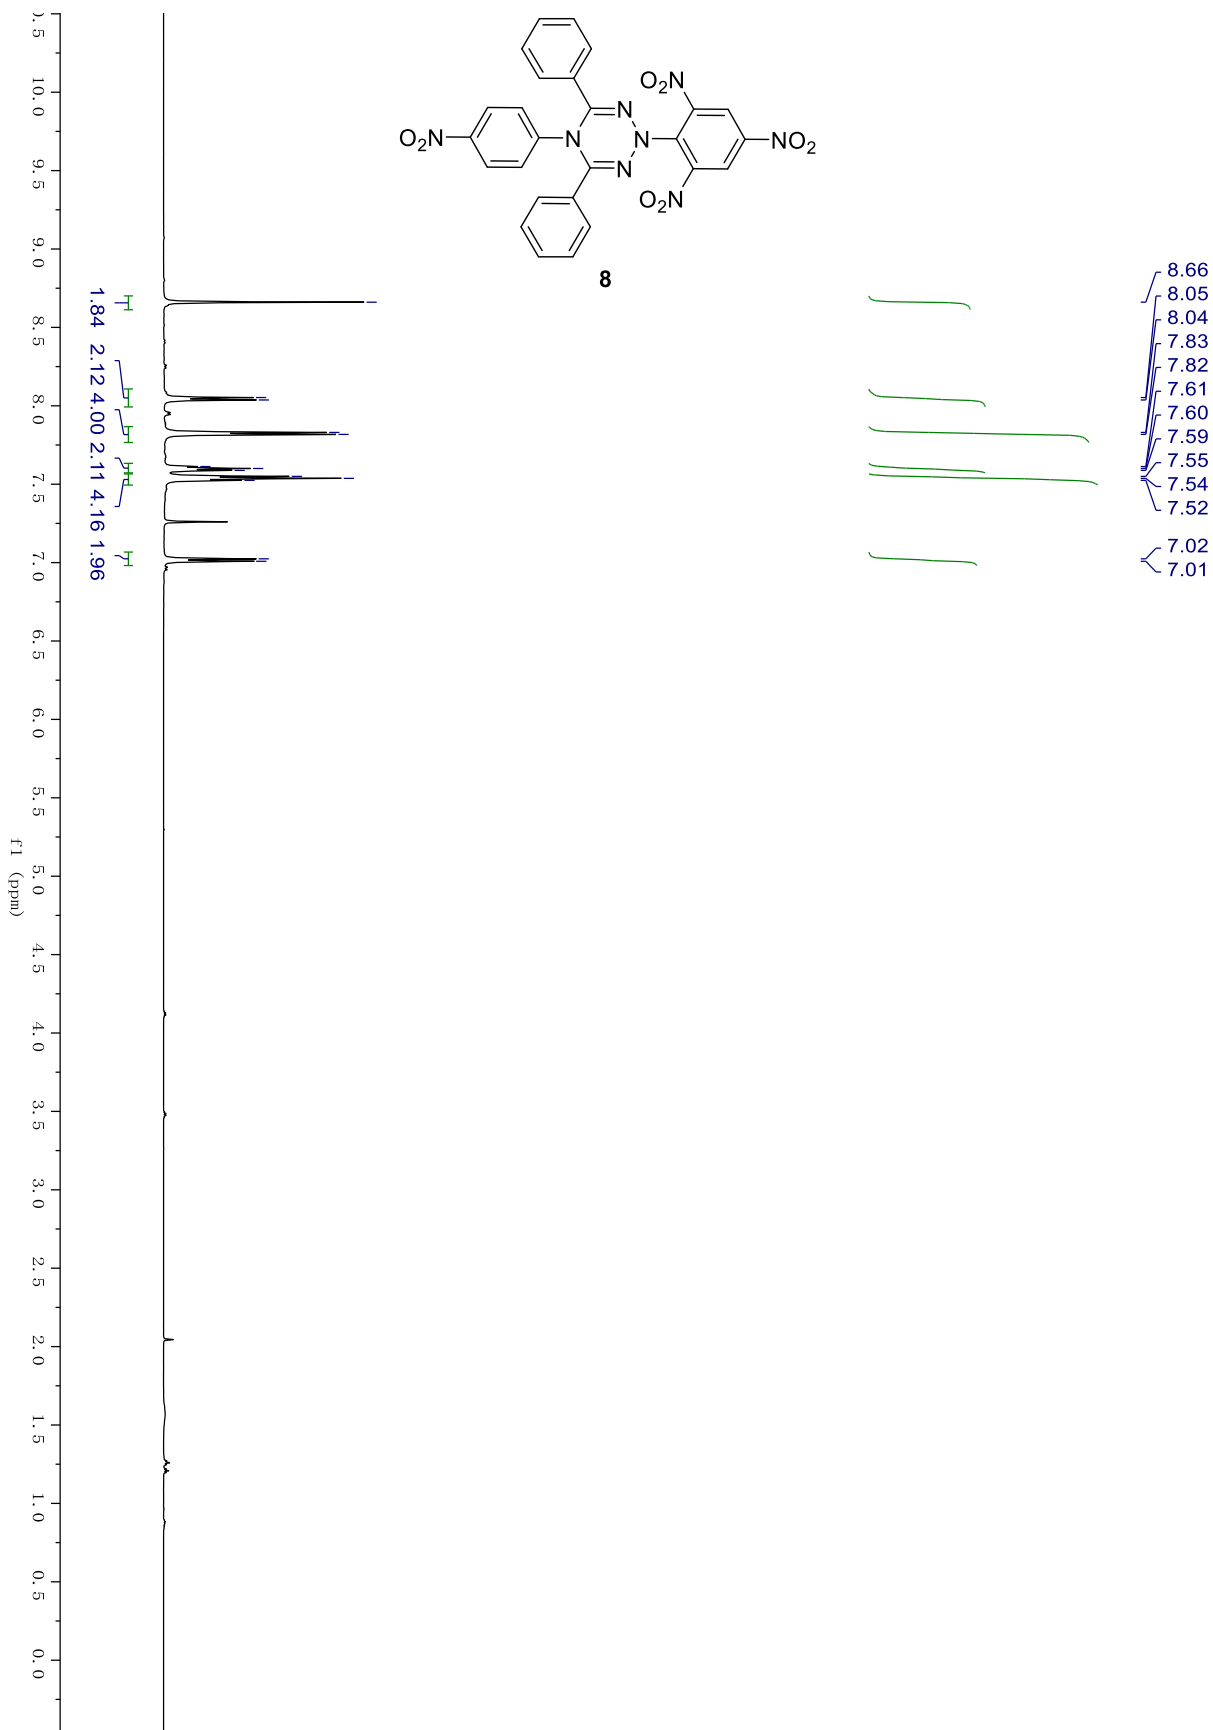

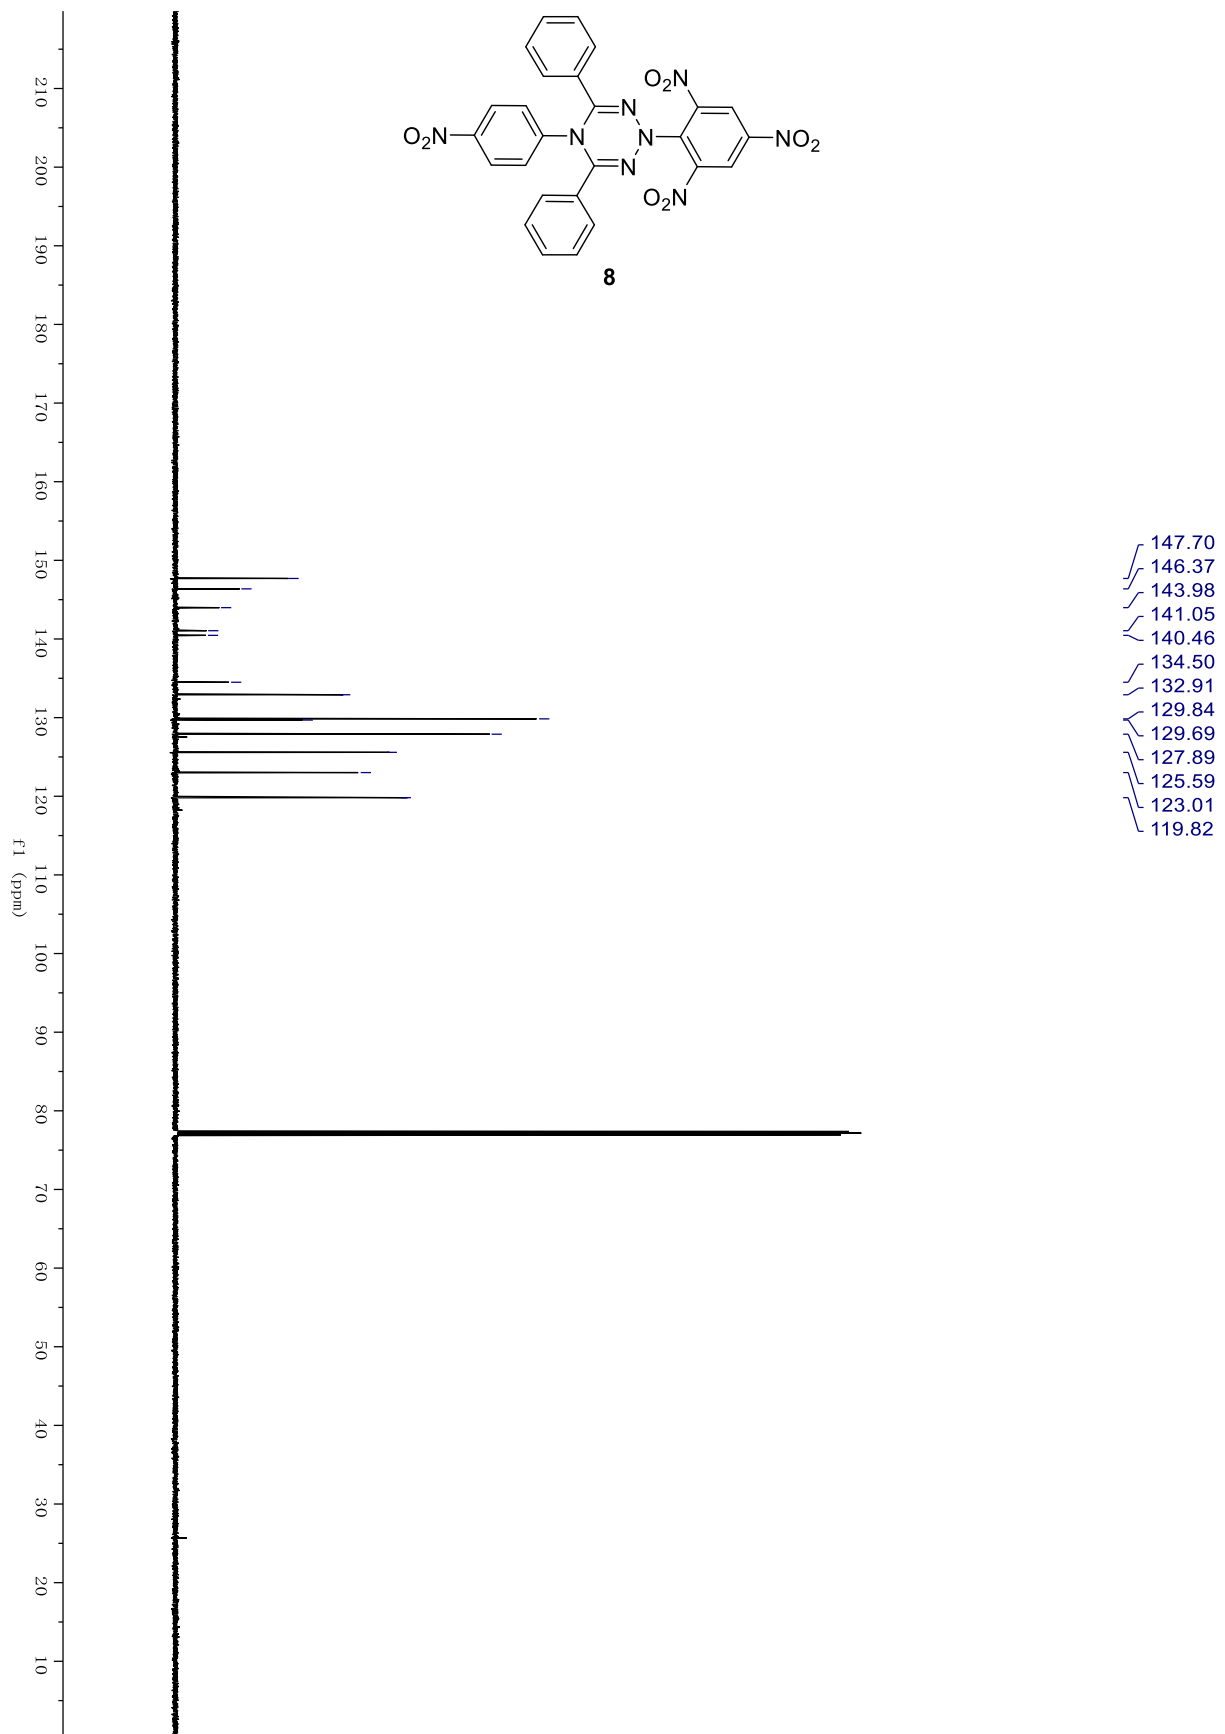

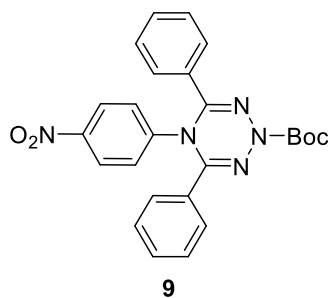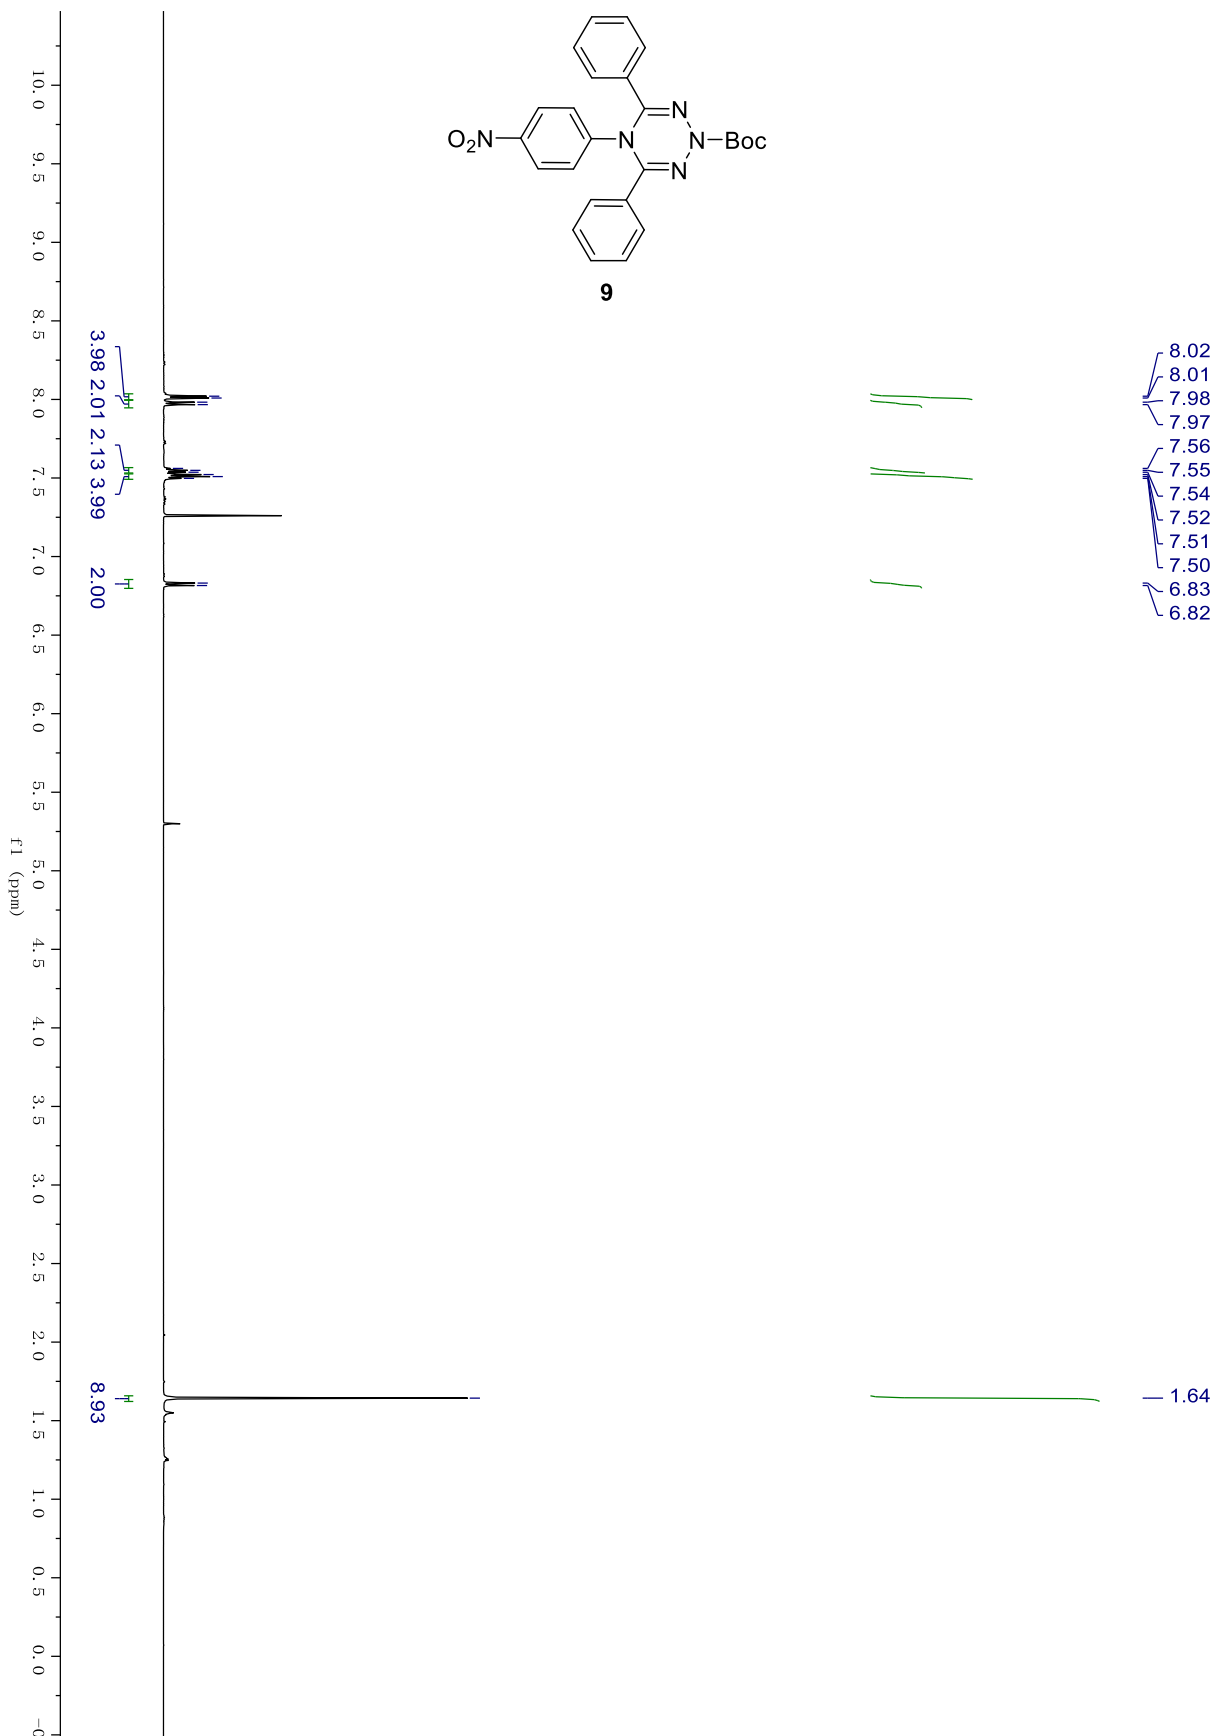

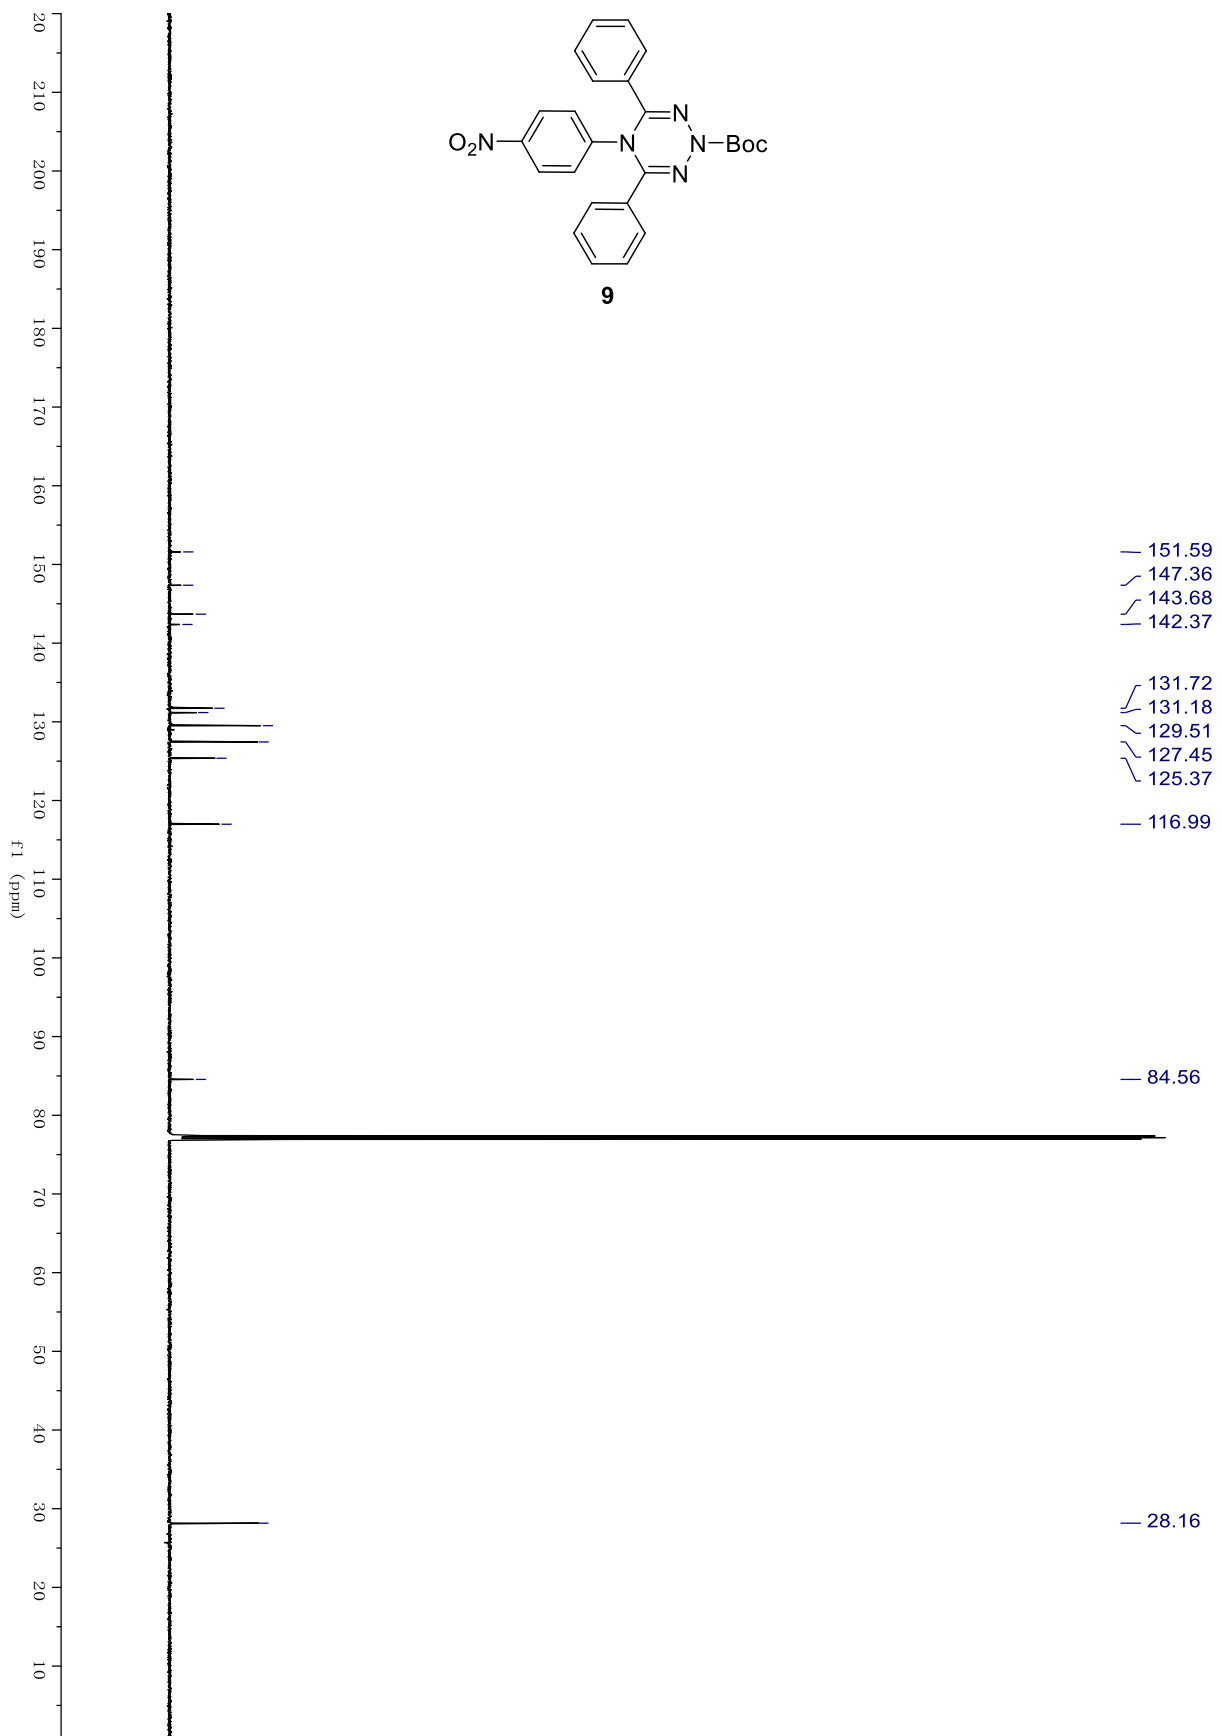

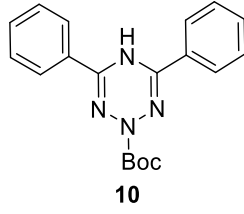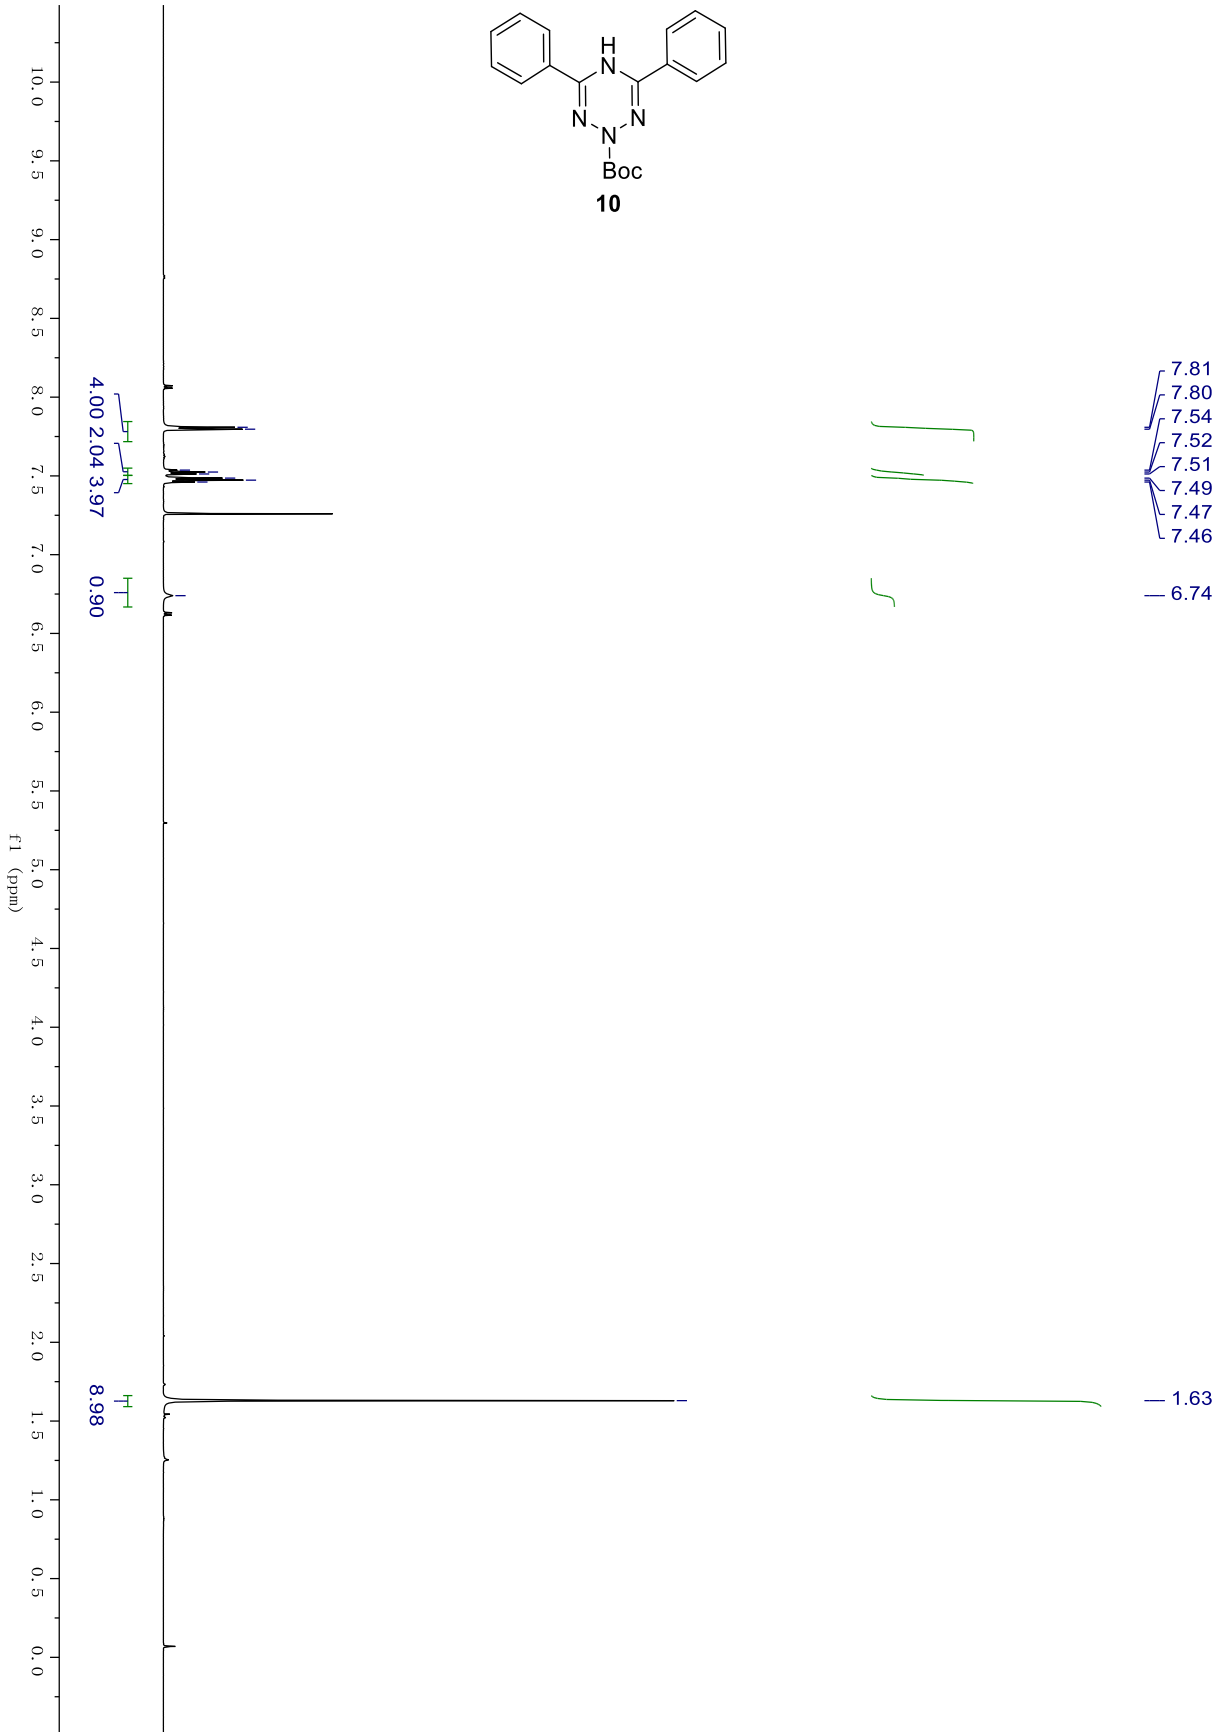

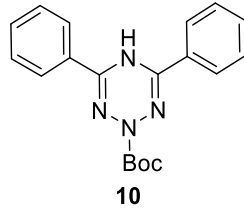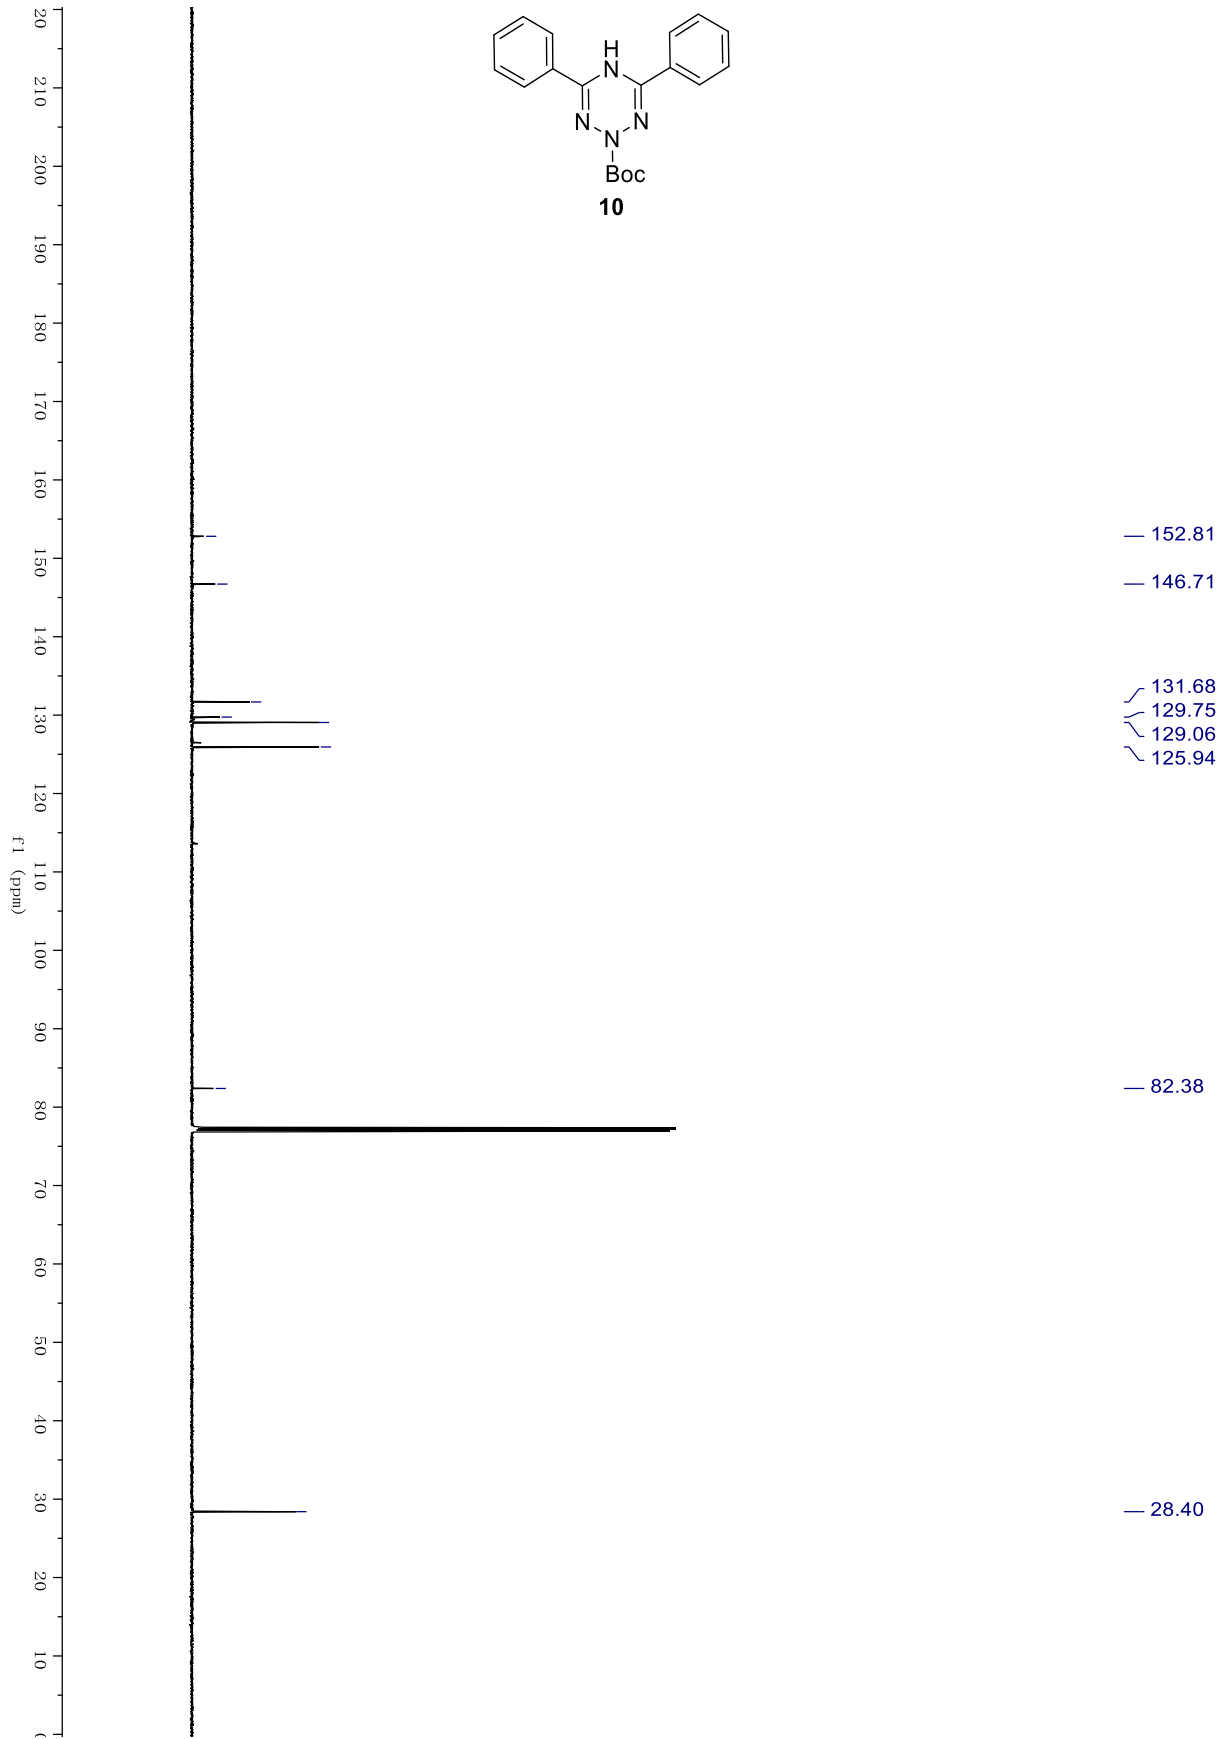



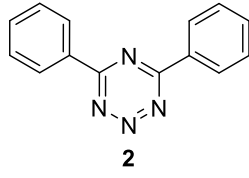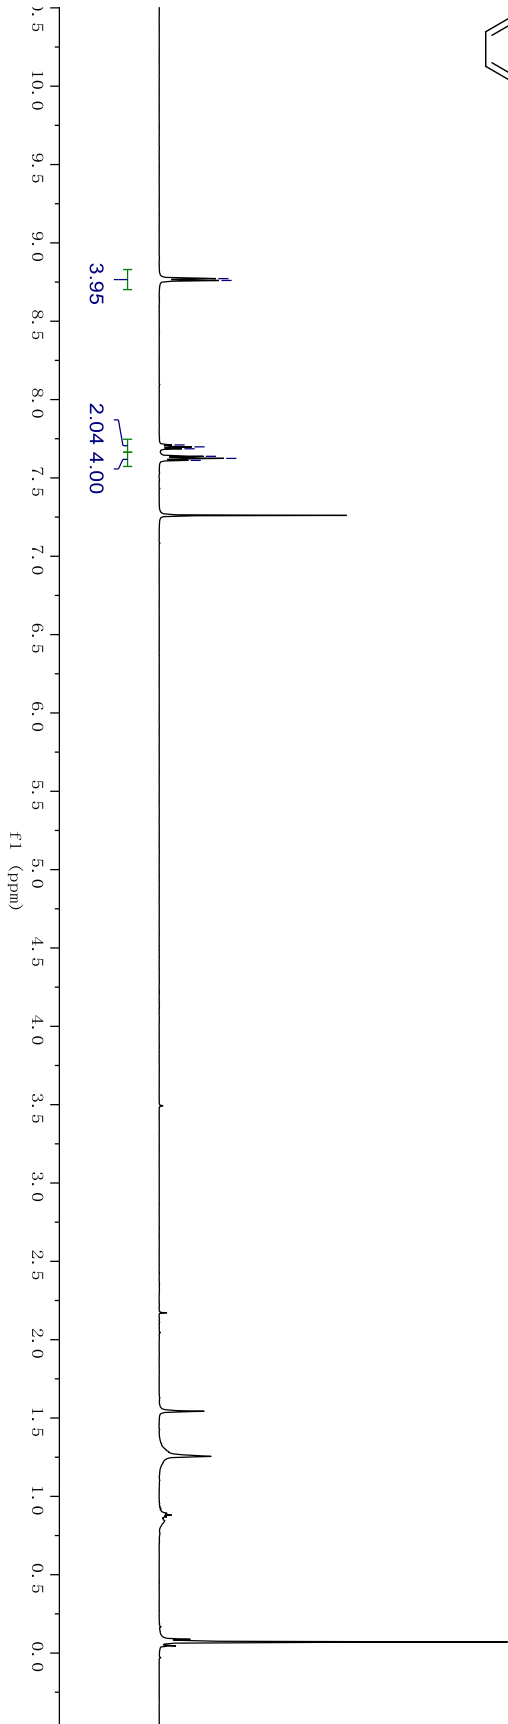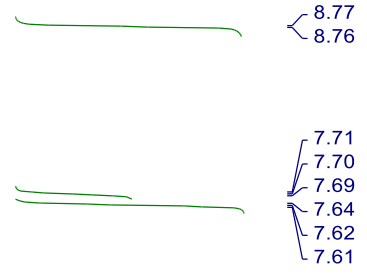

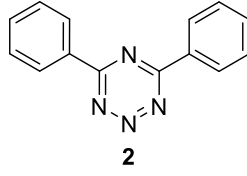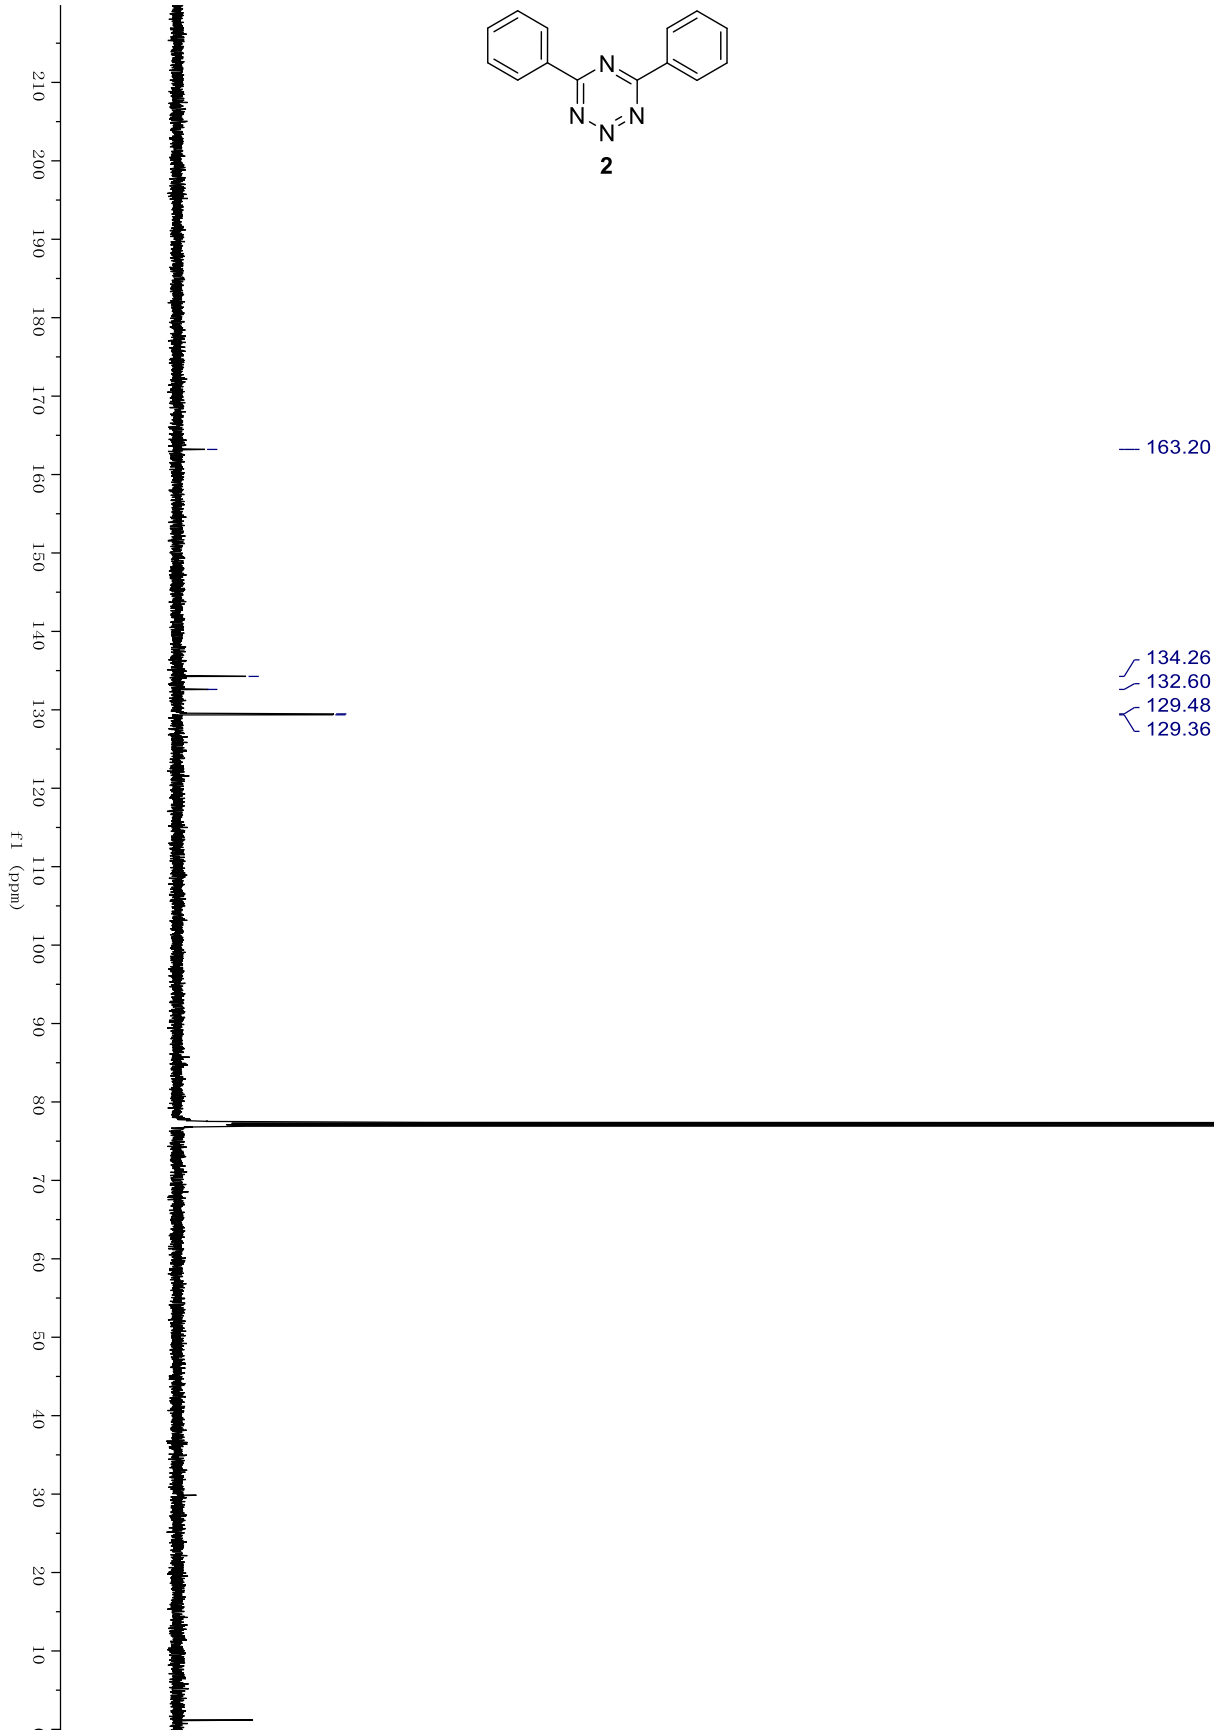

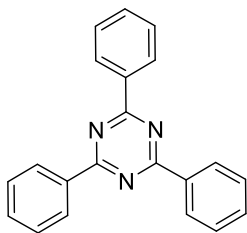

**12a**

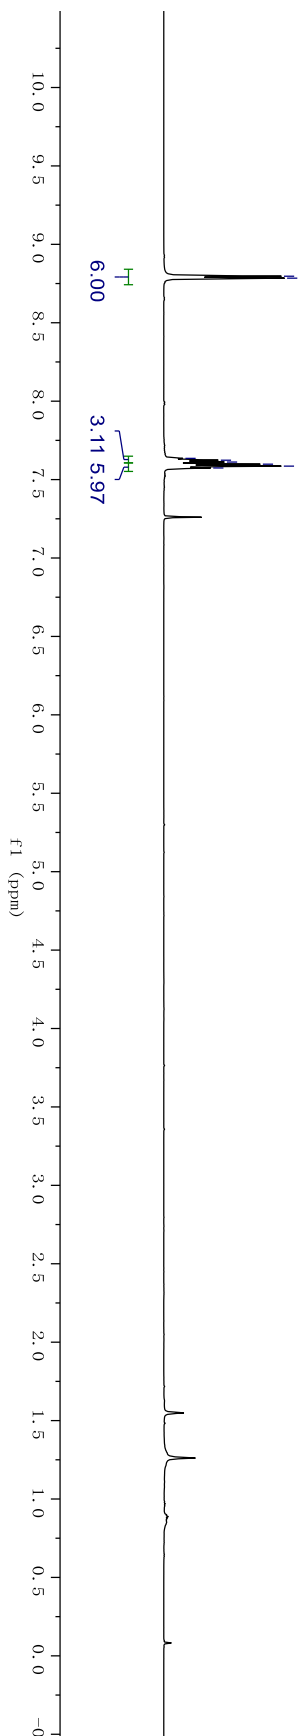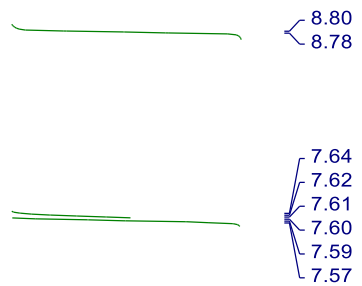

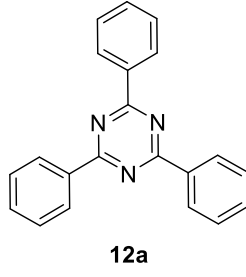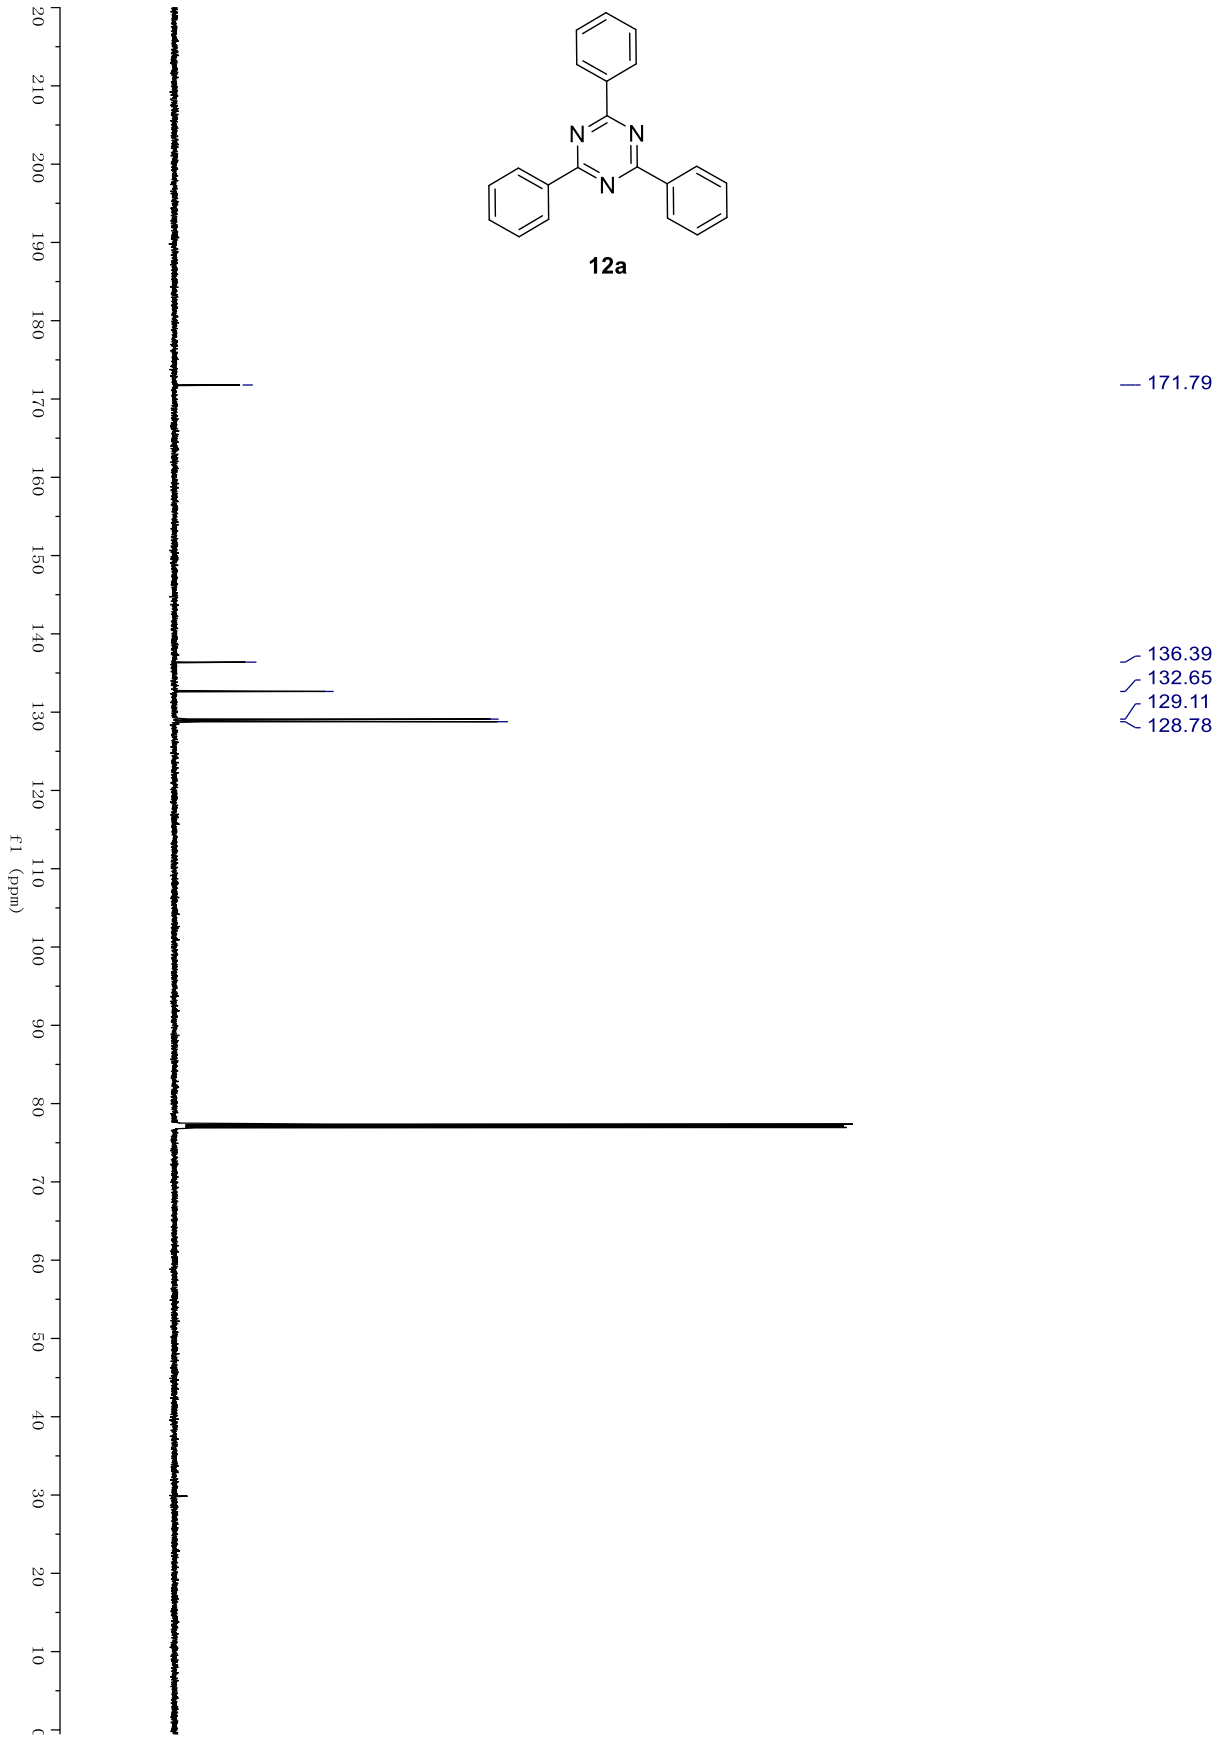

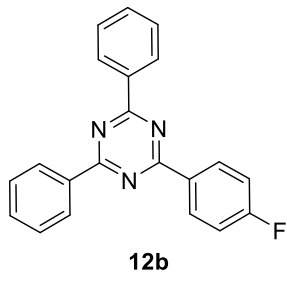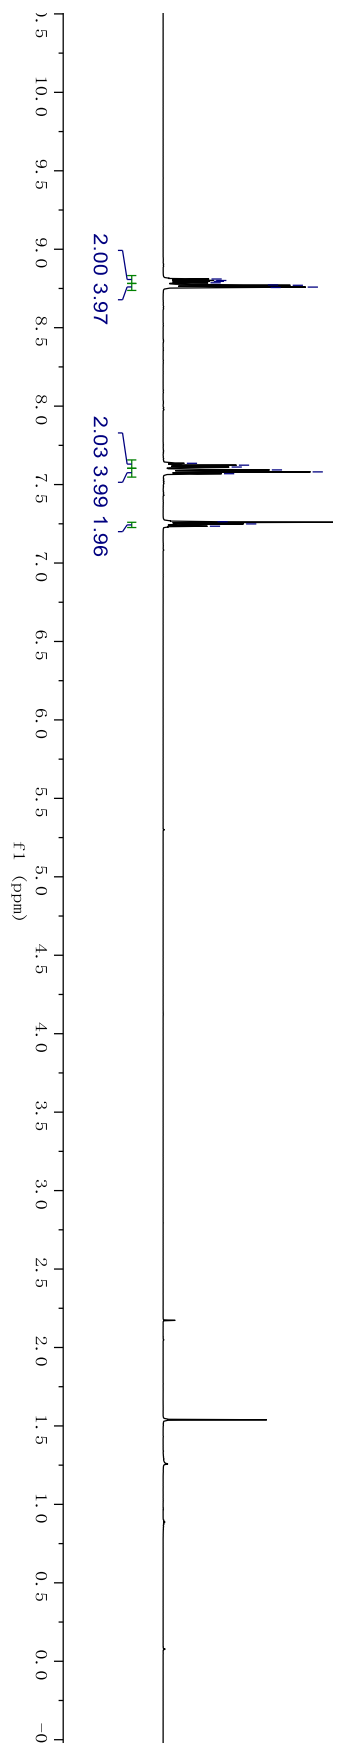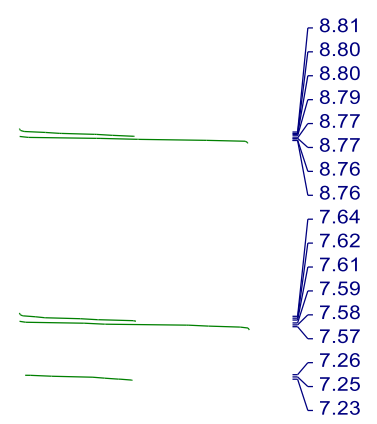

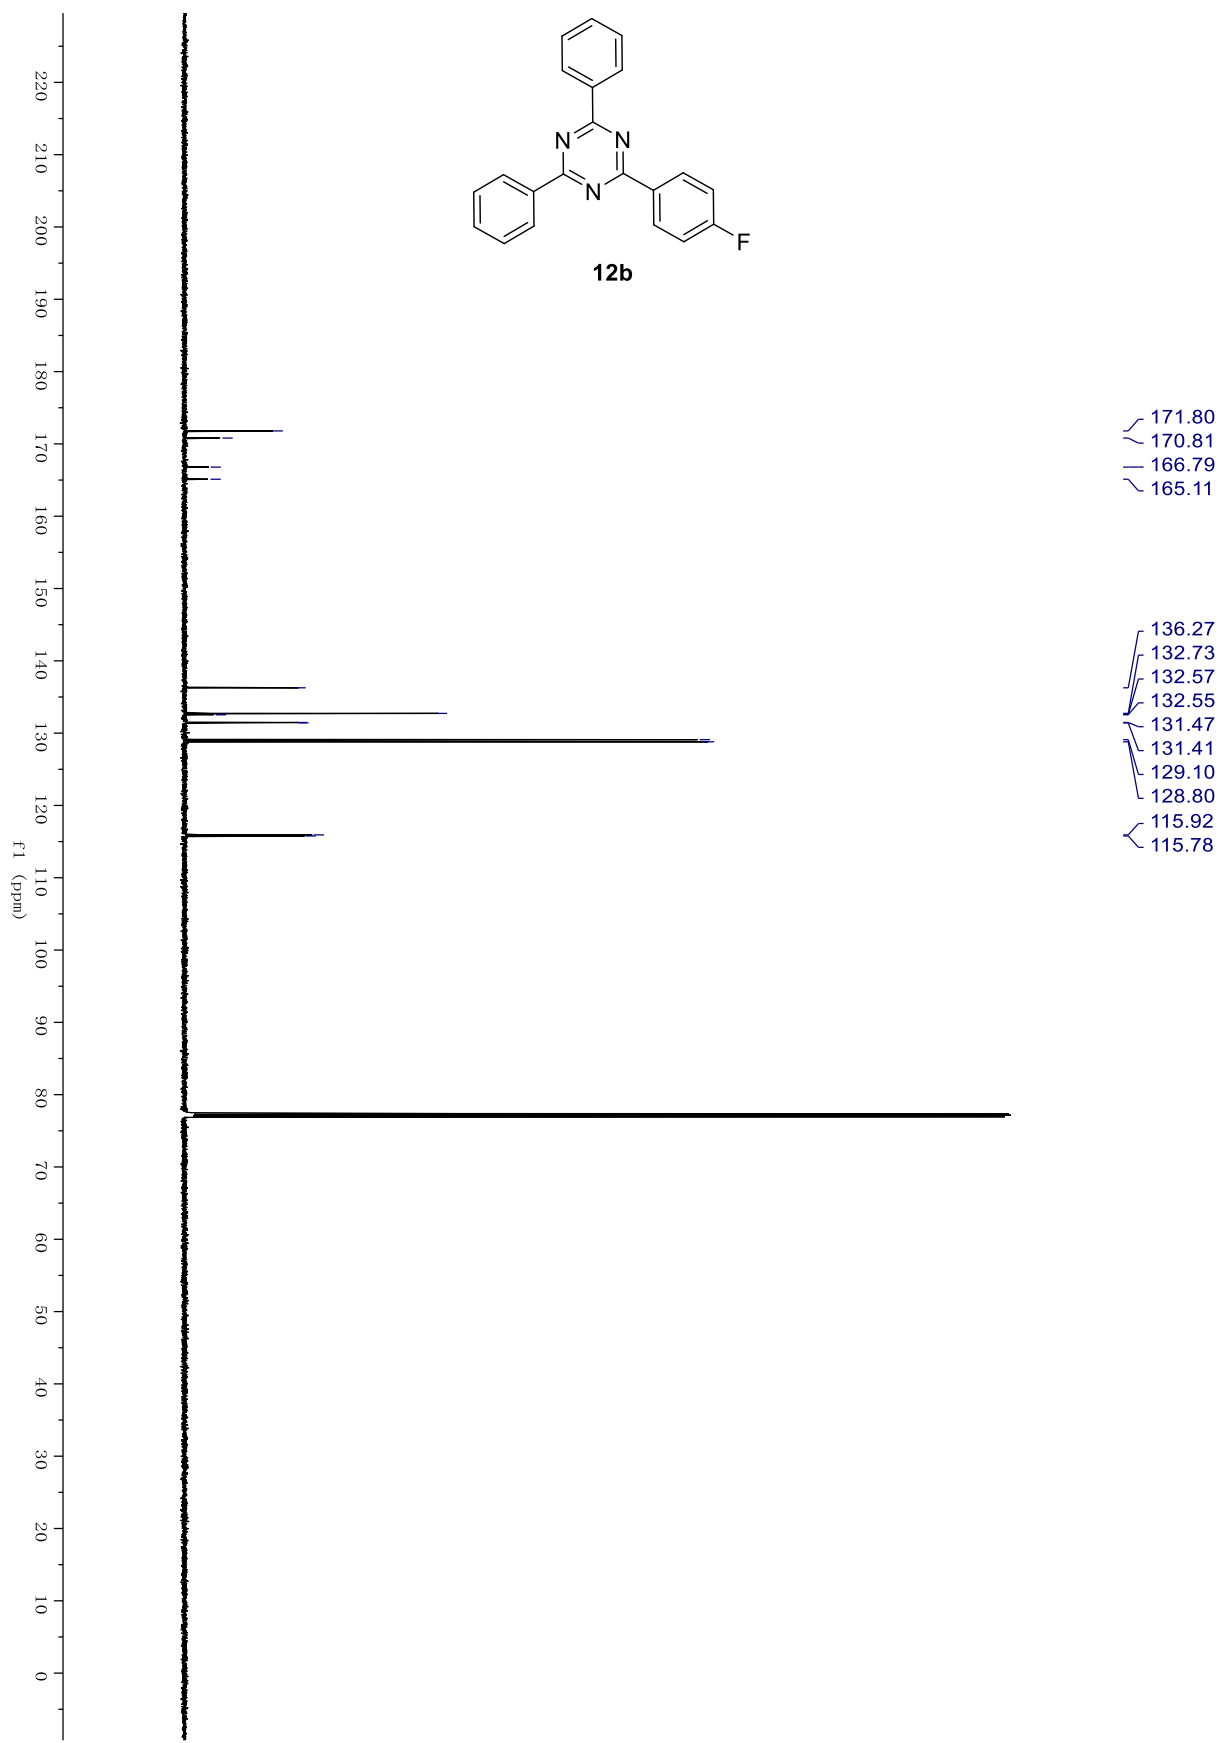

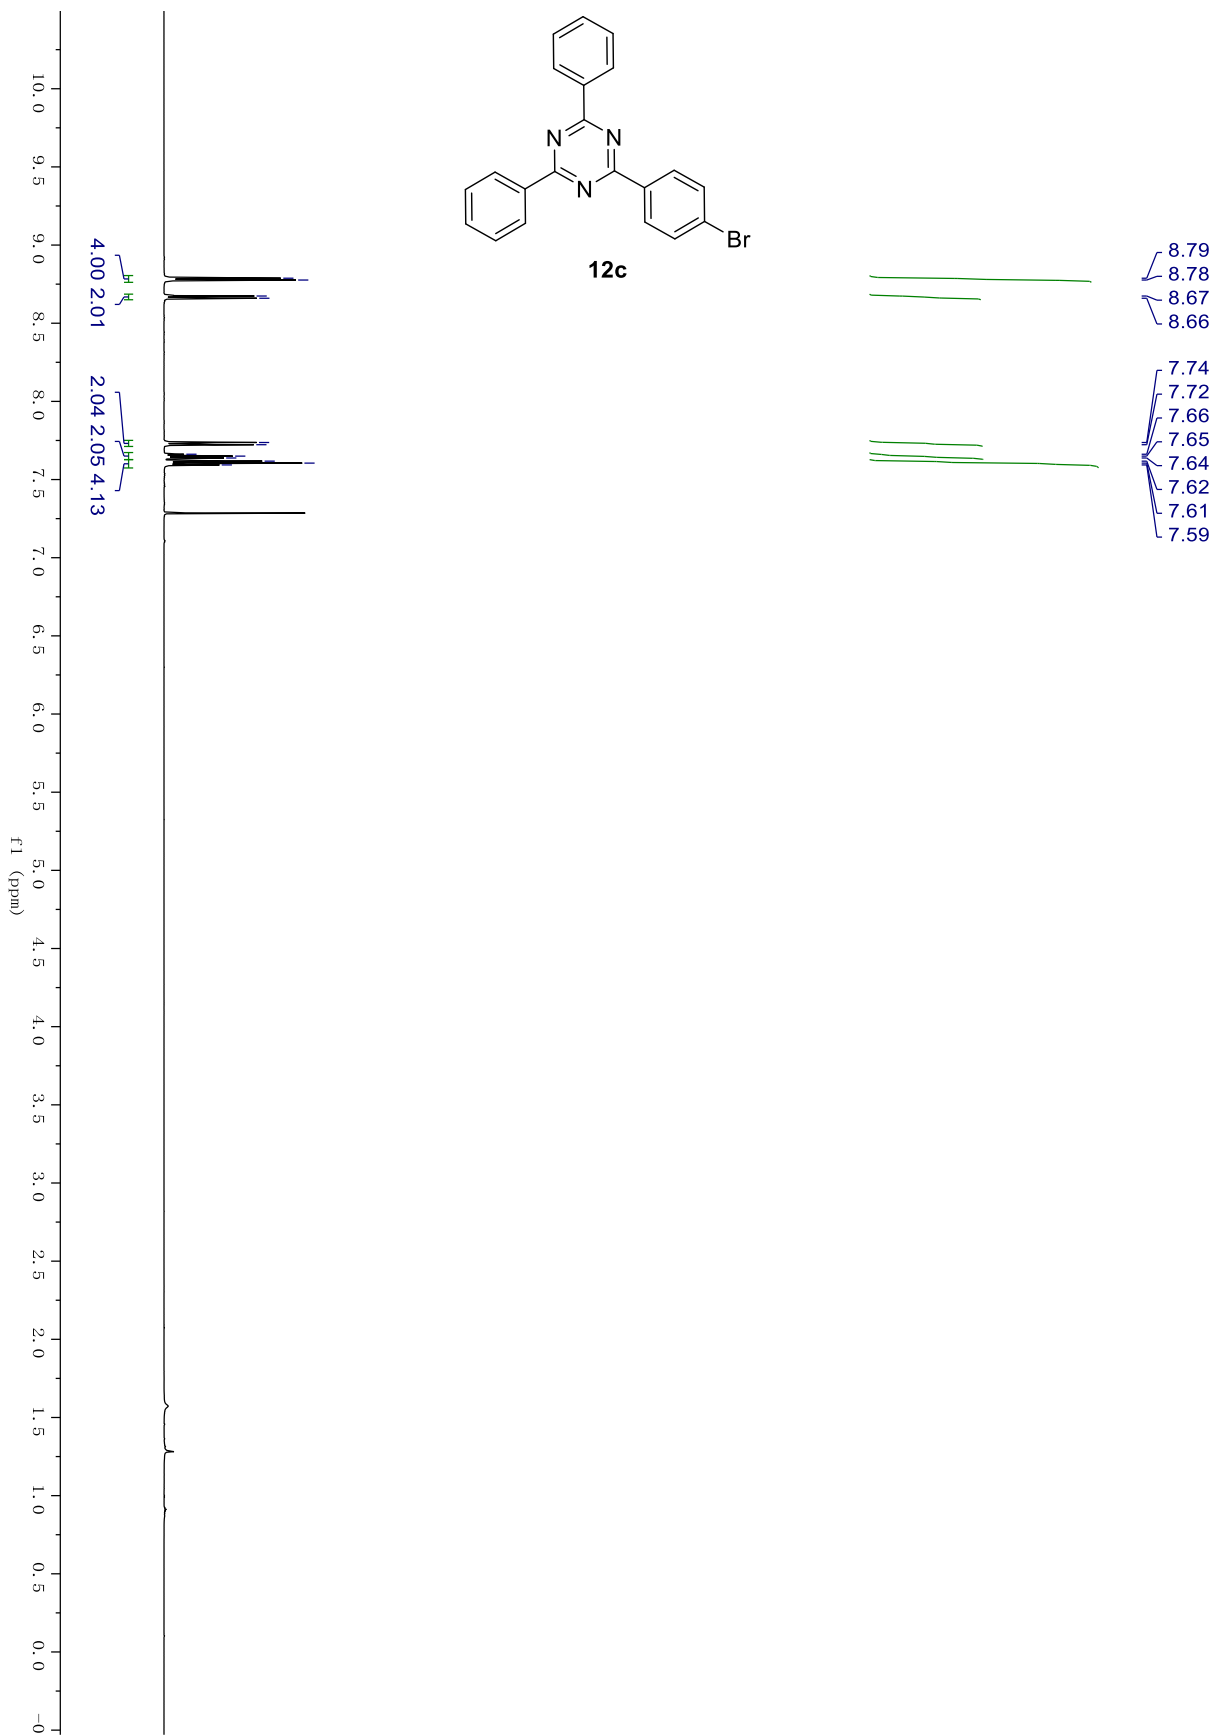

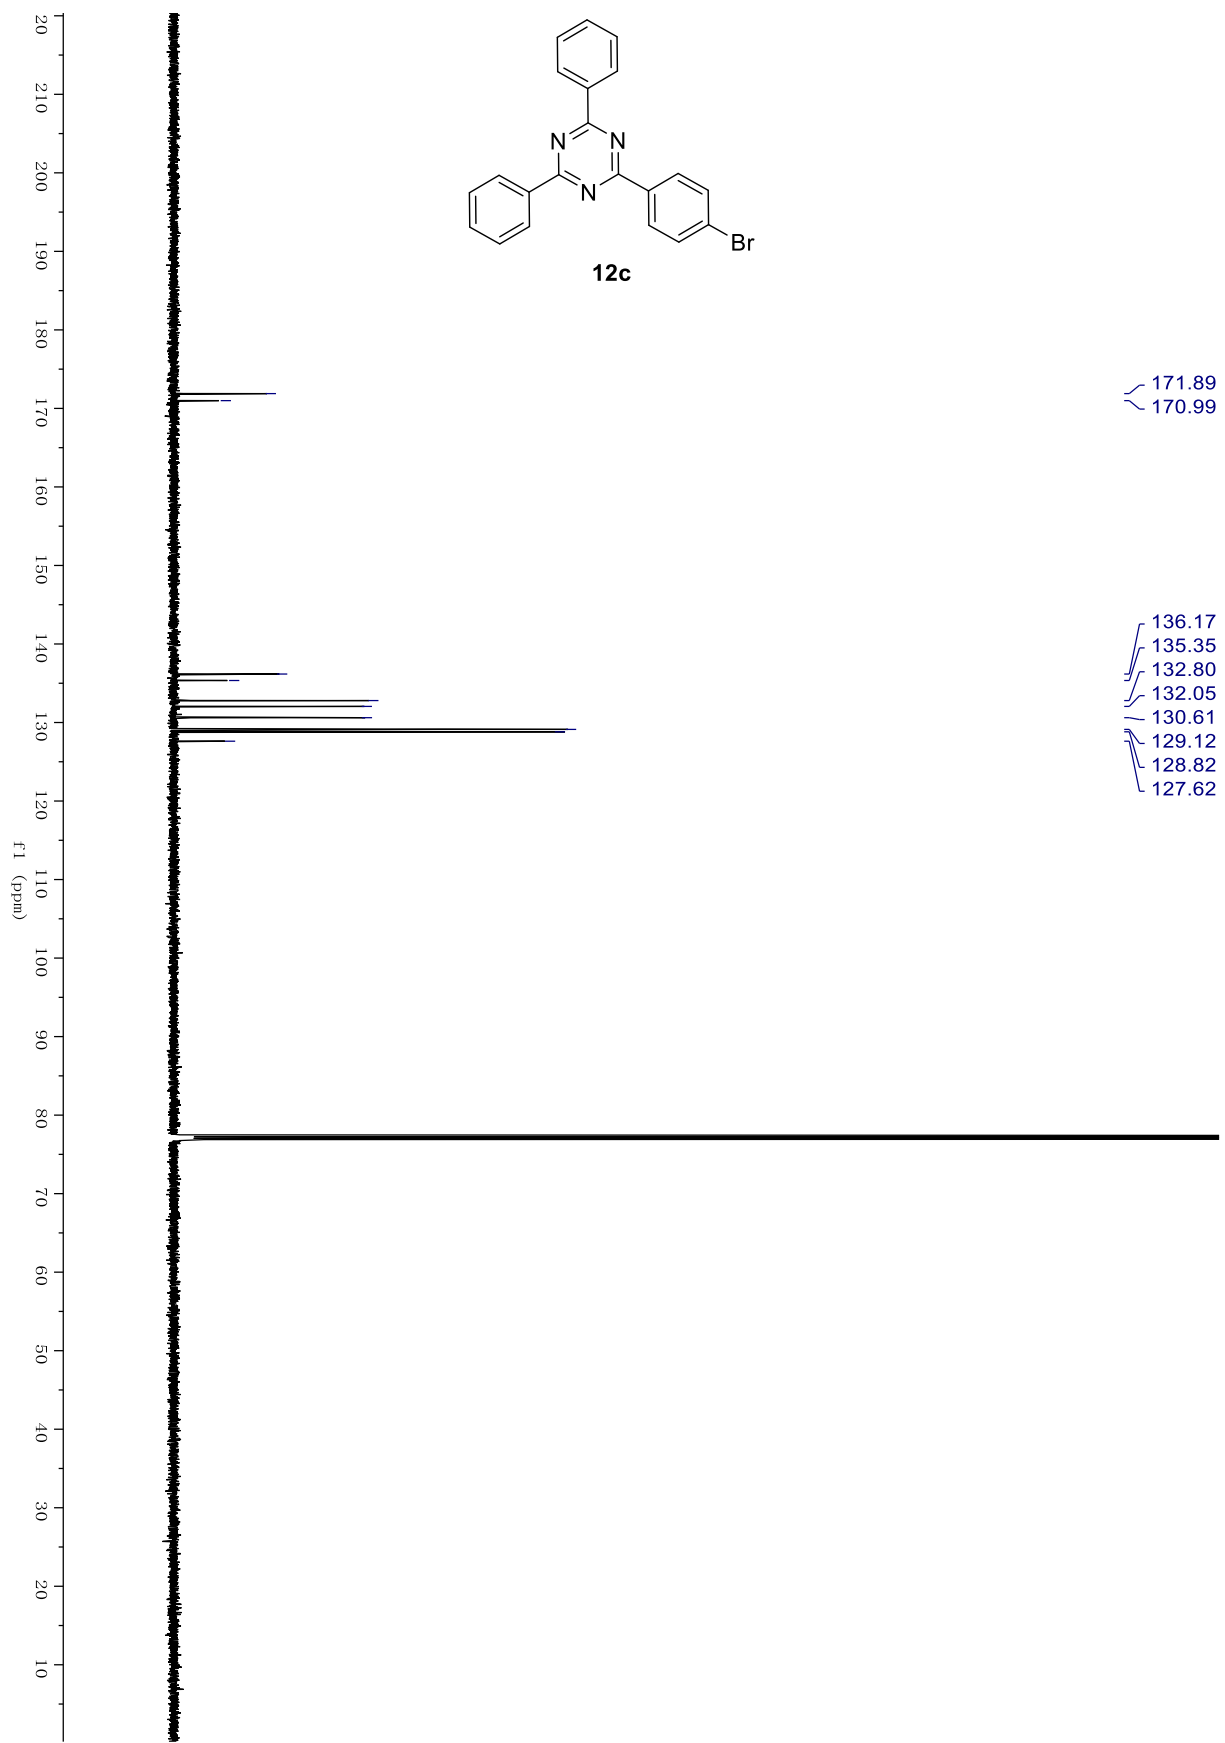



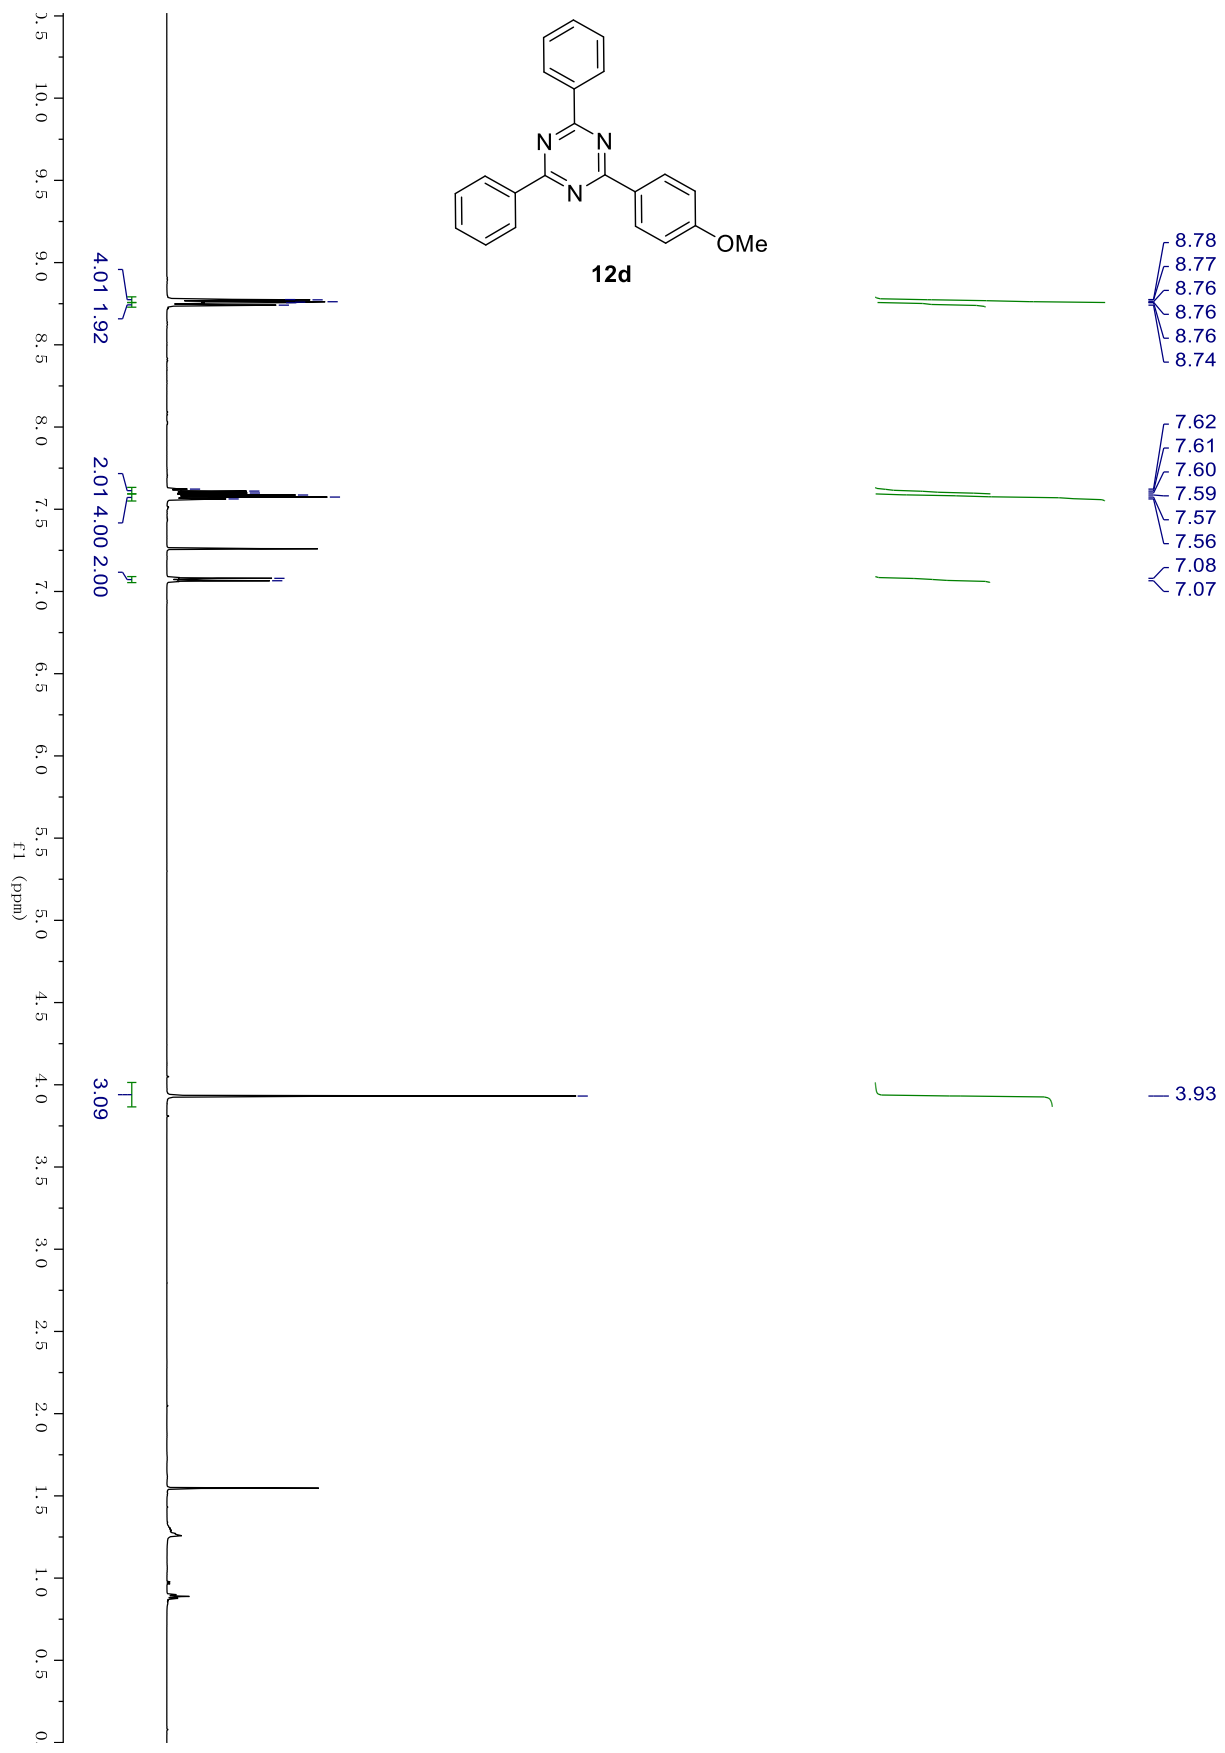

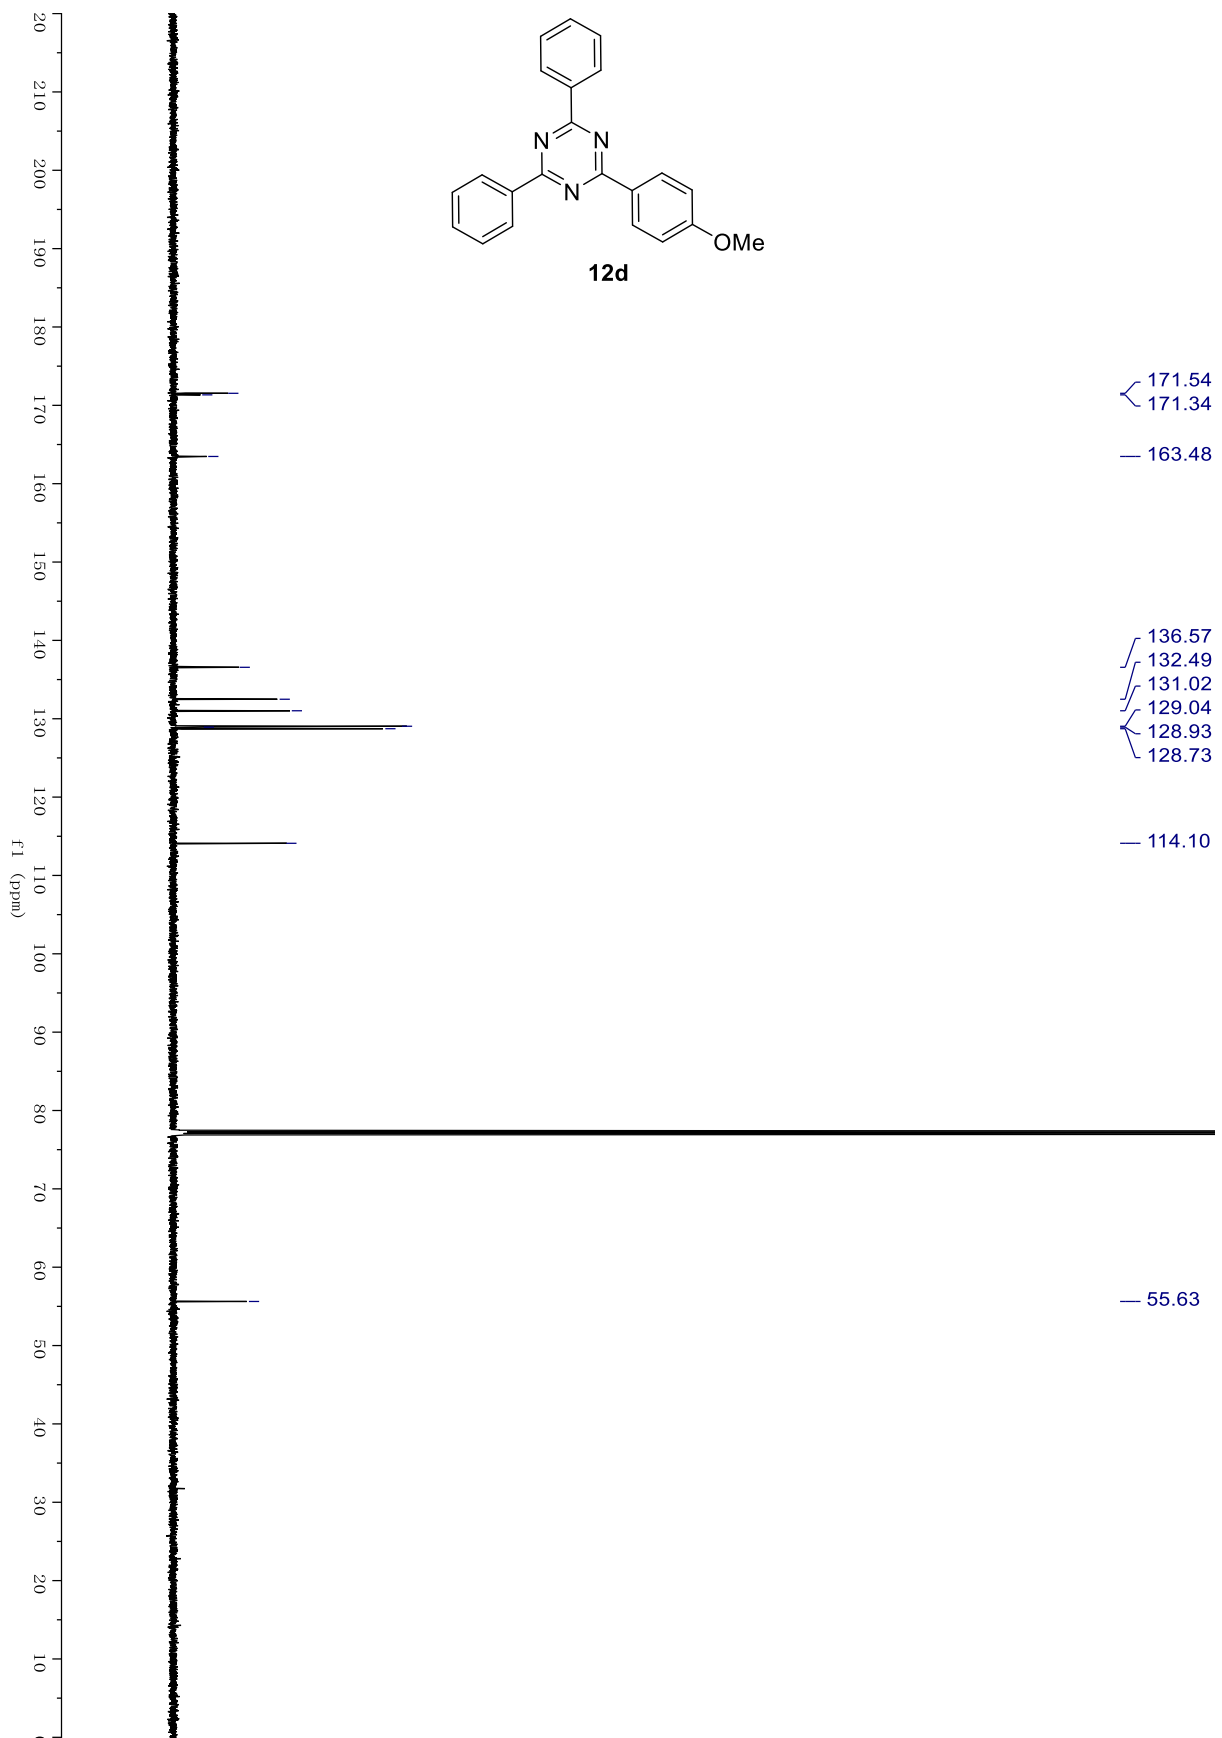

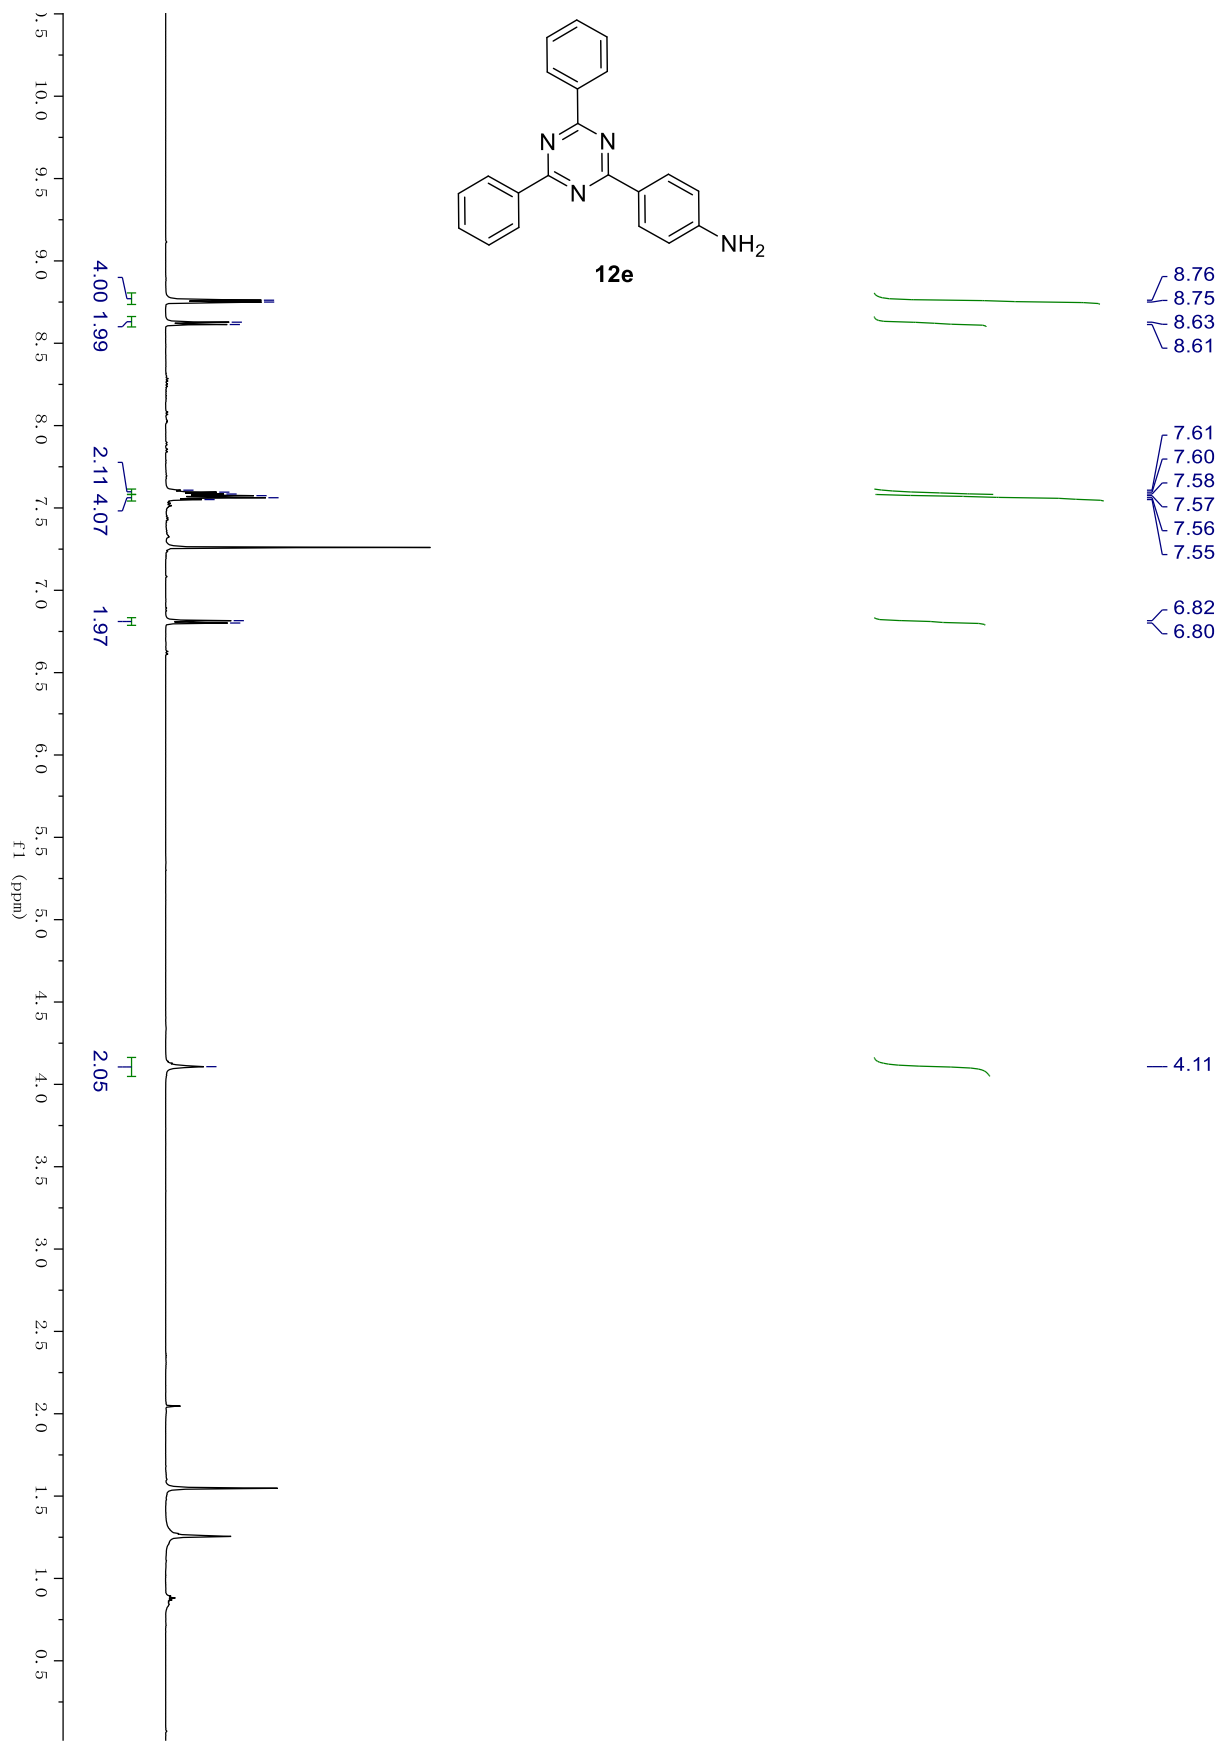

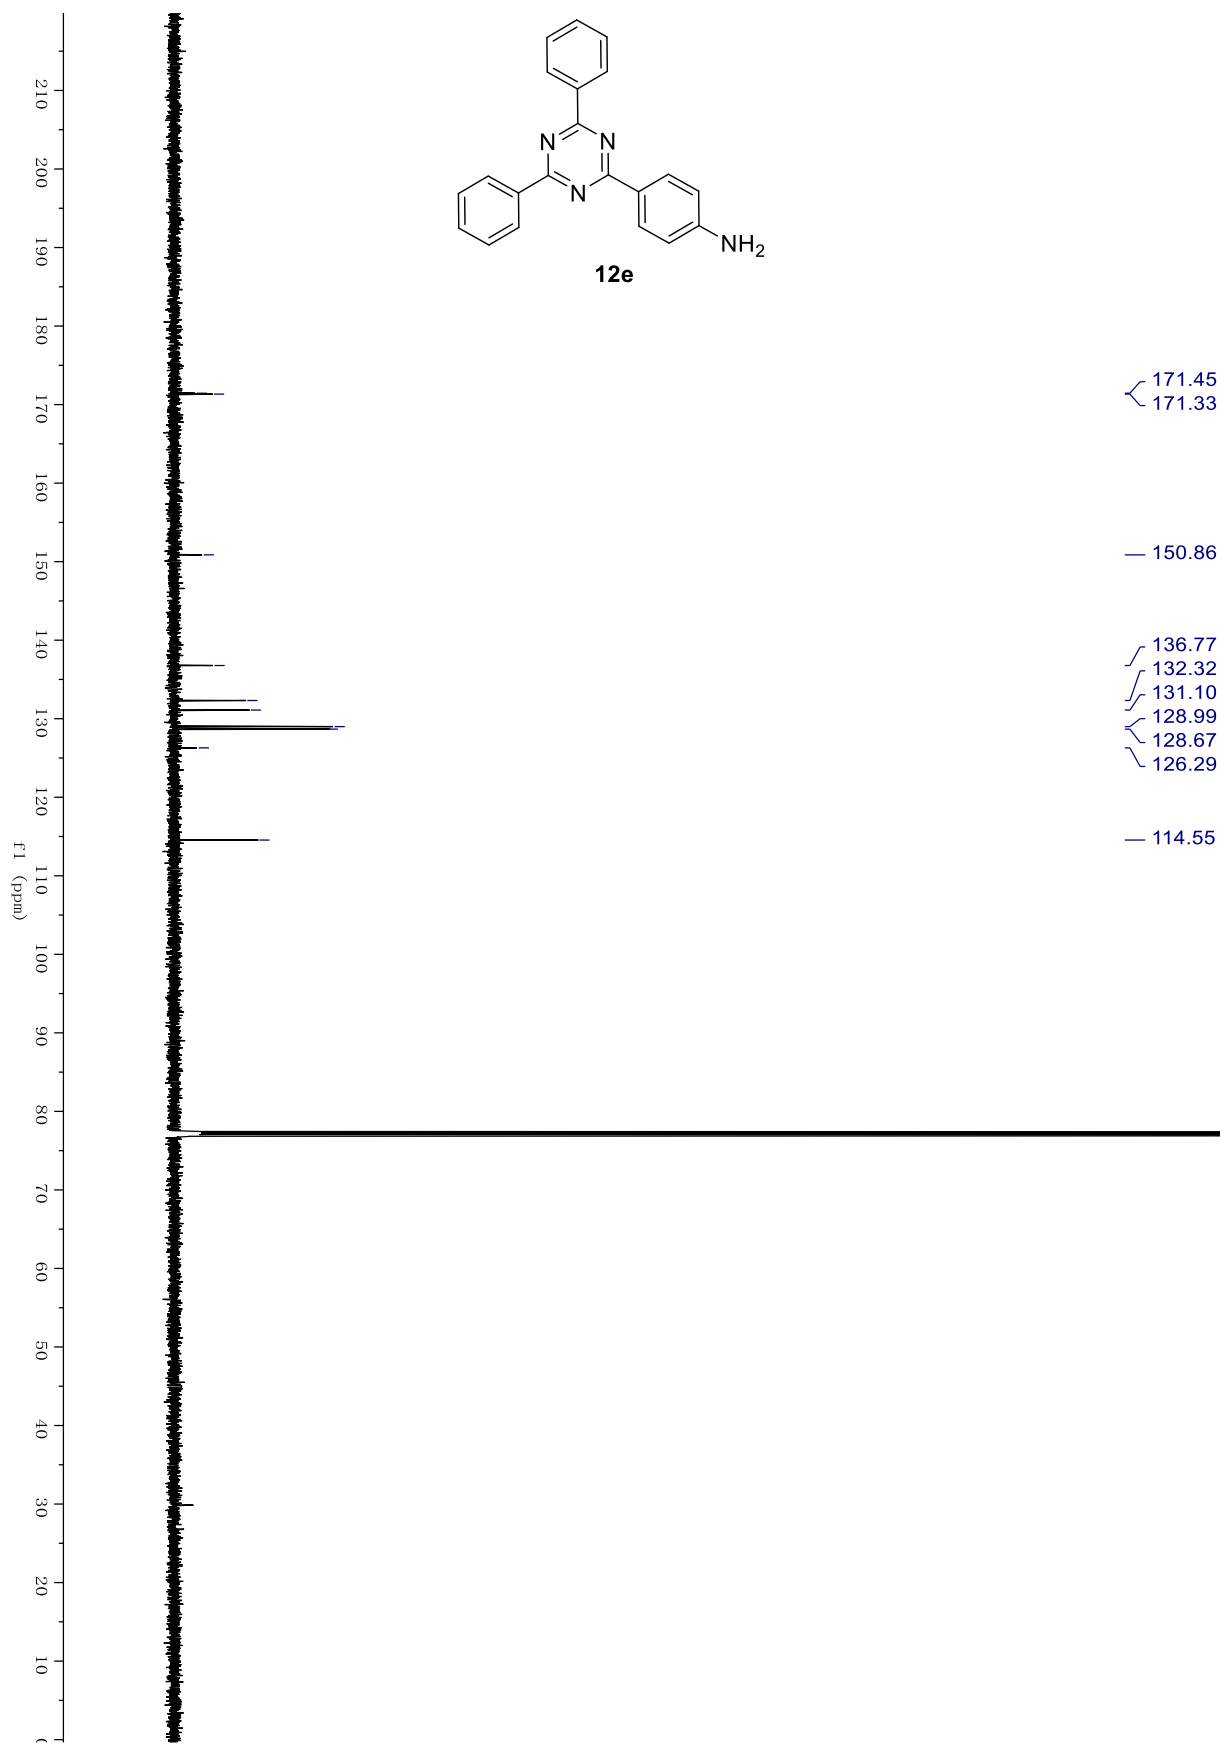

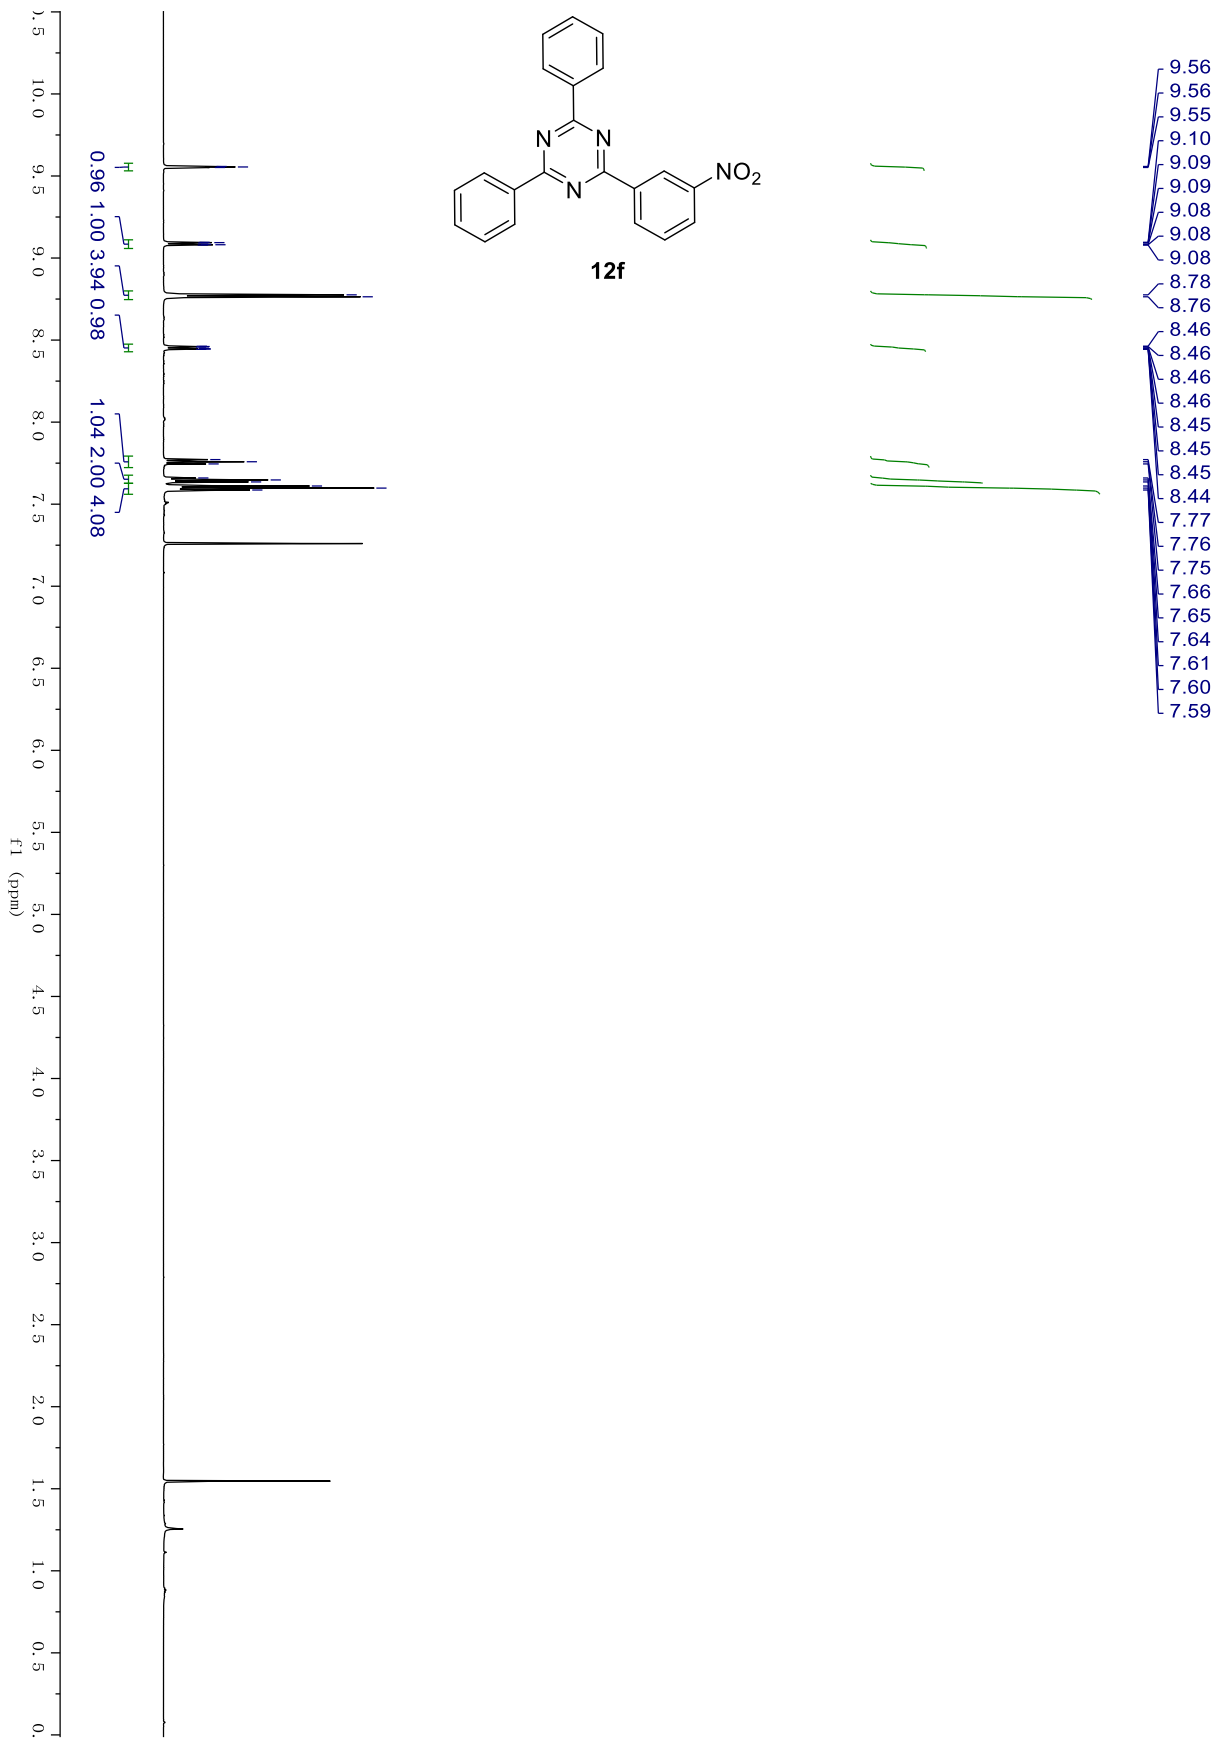

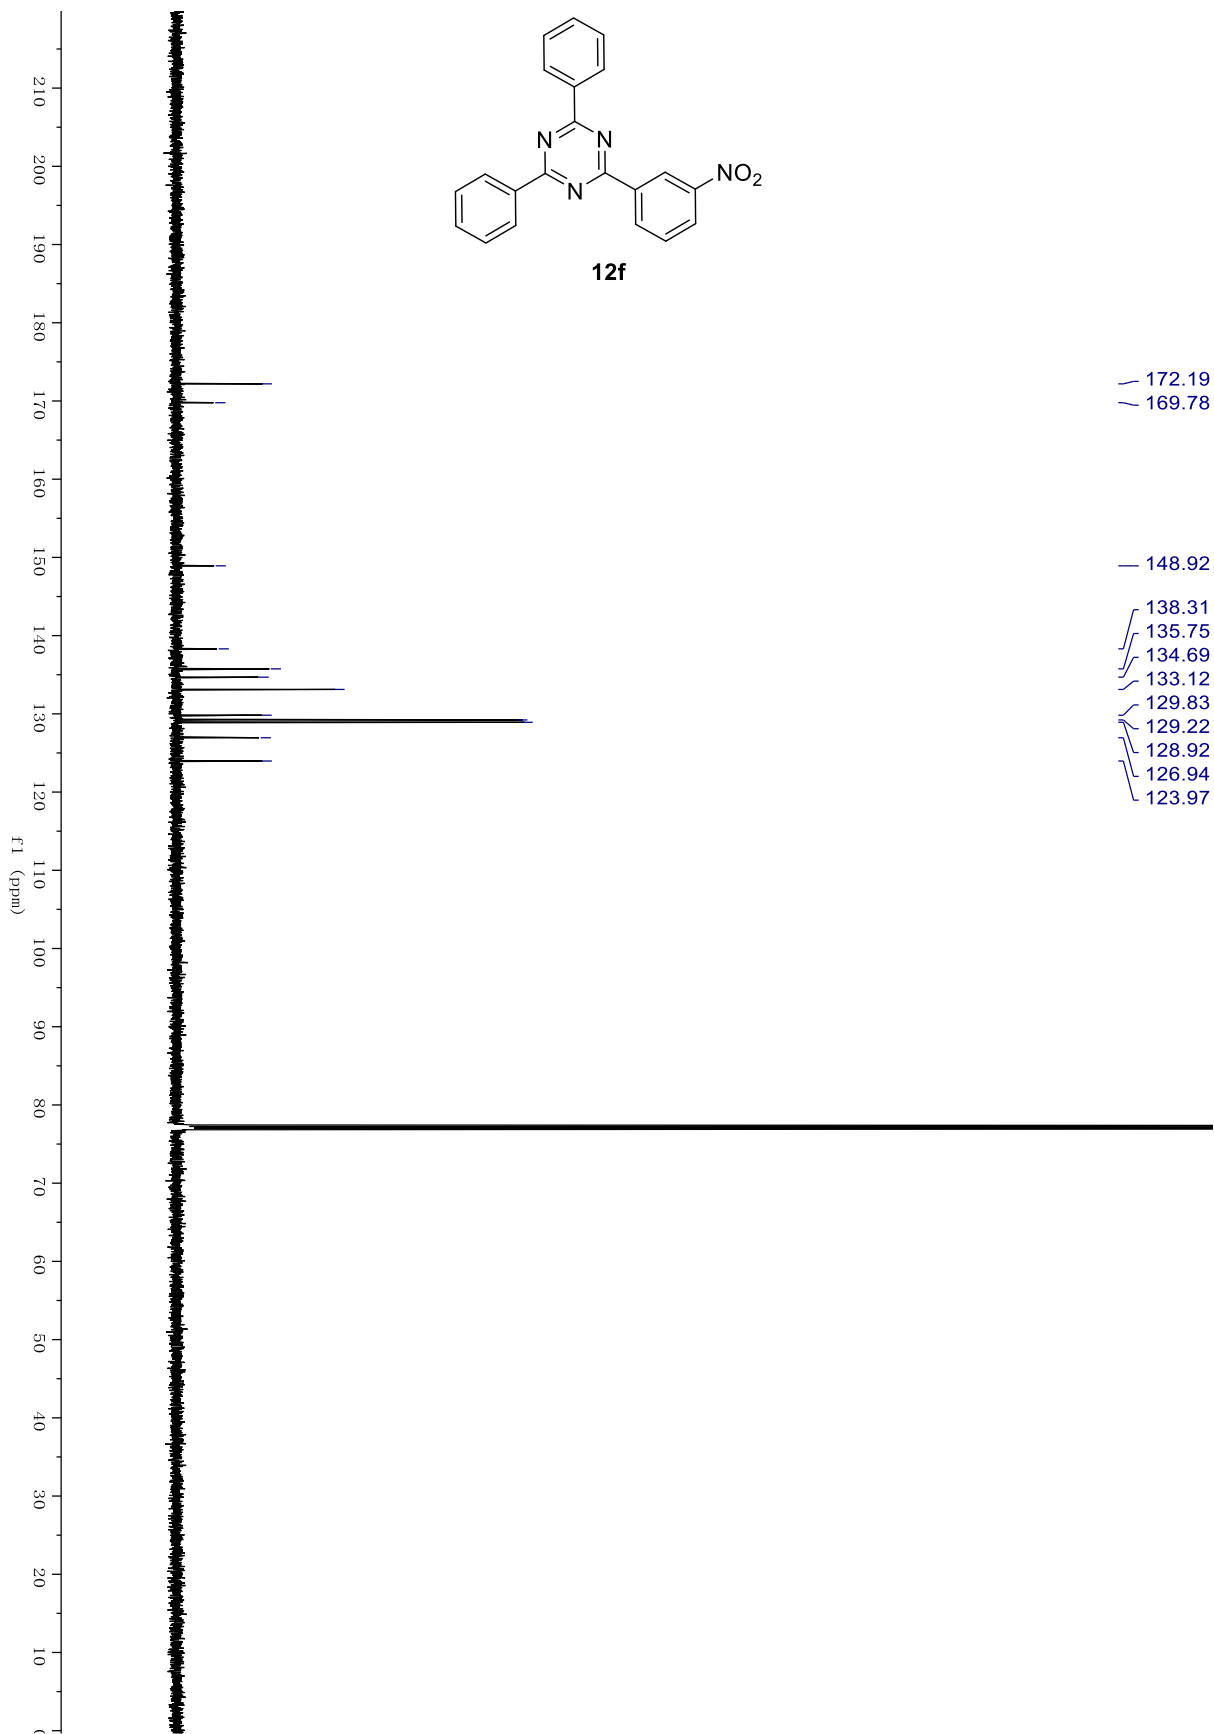

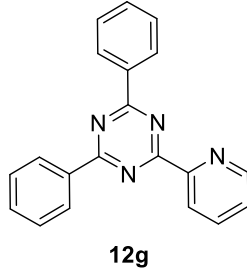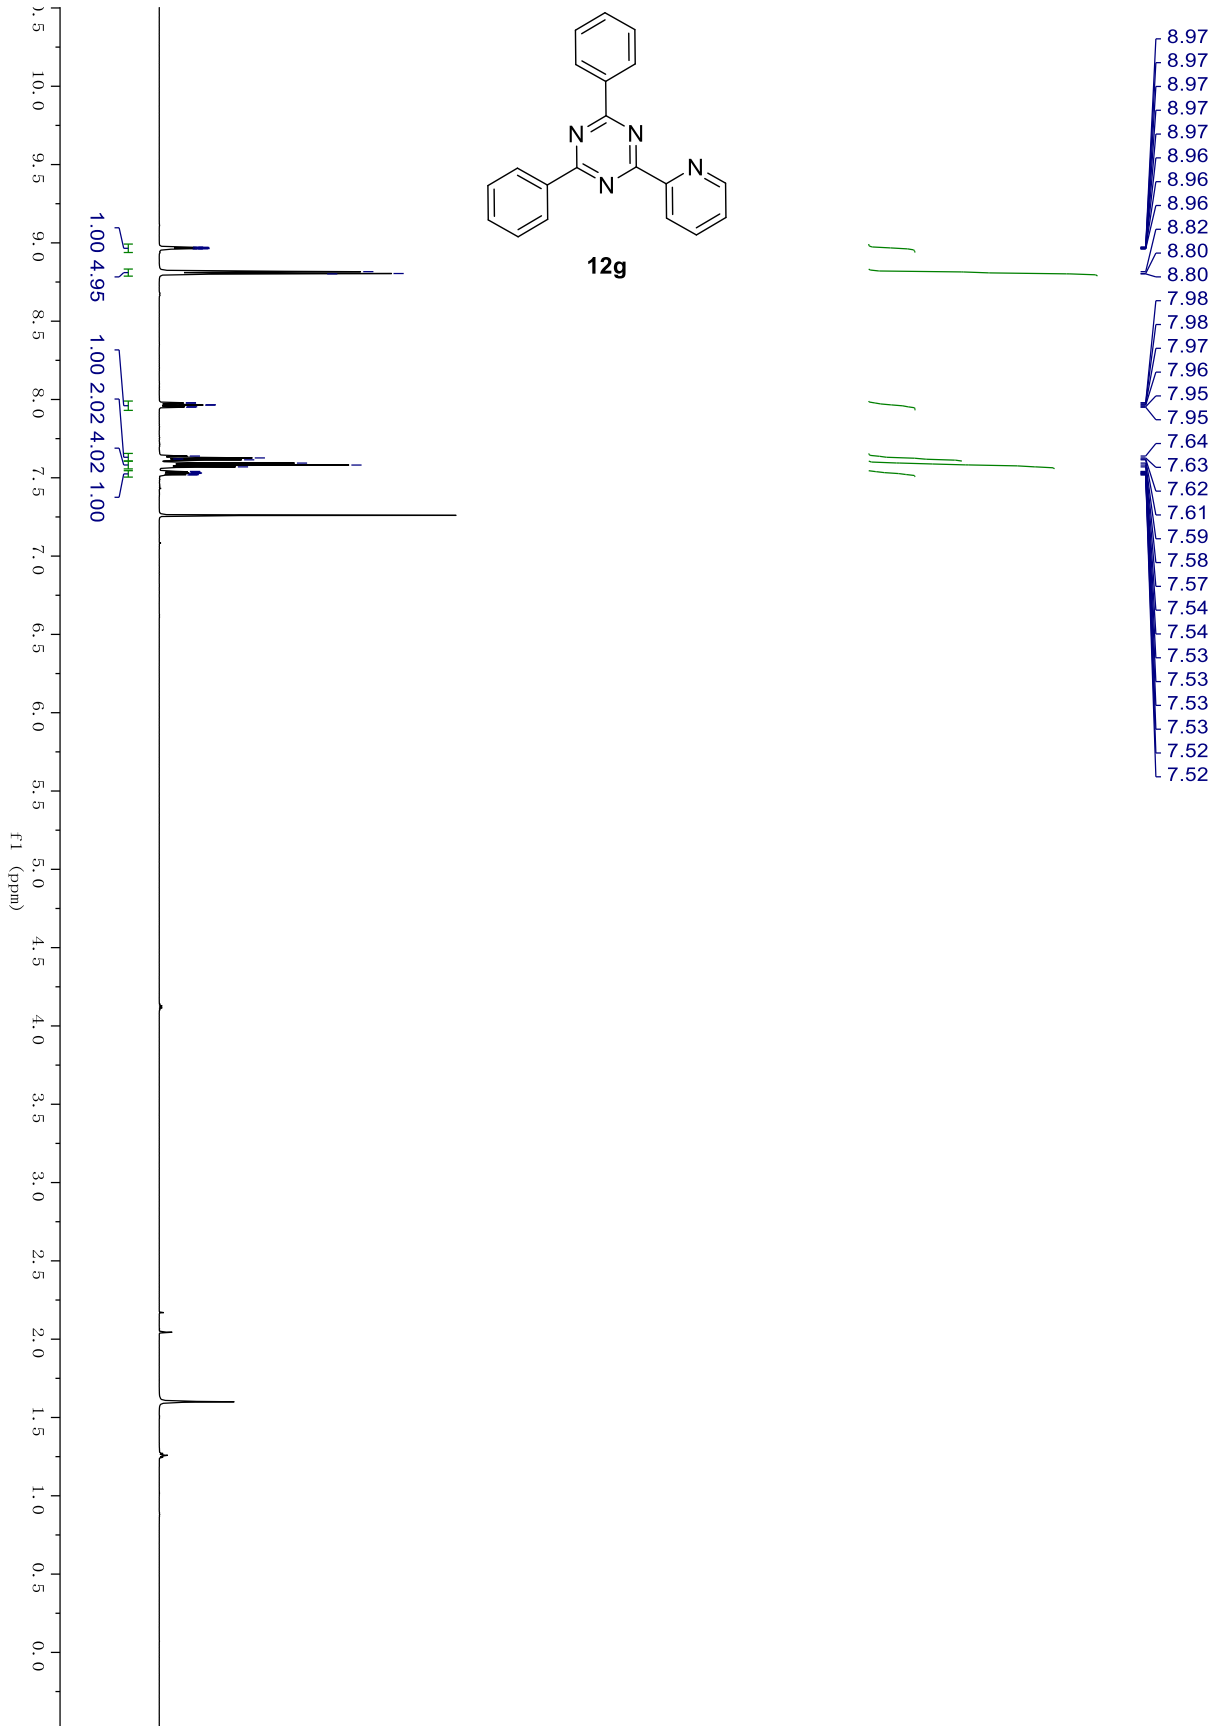

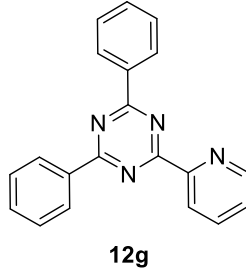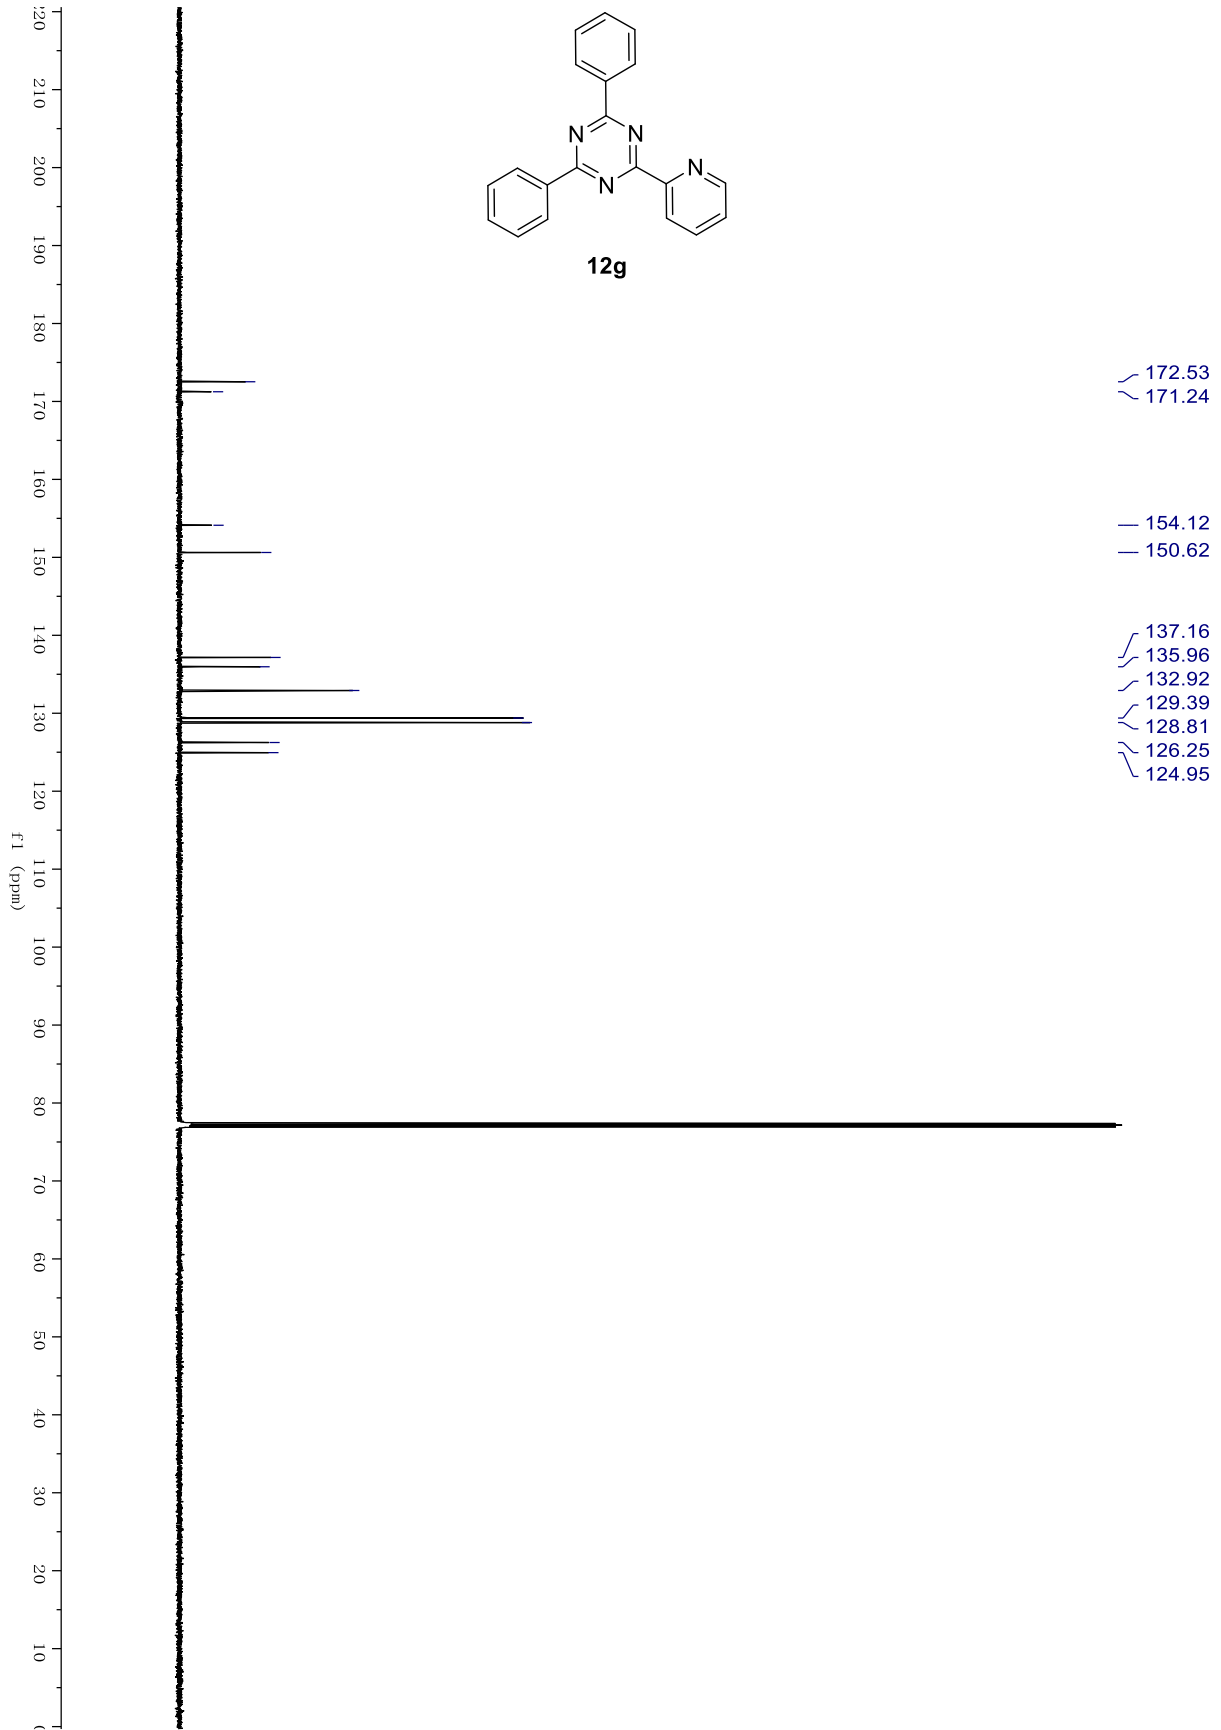



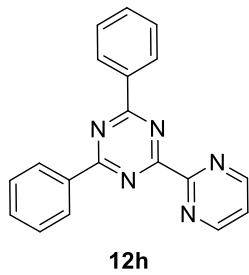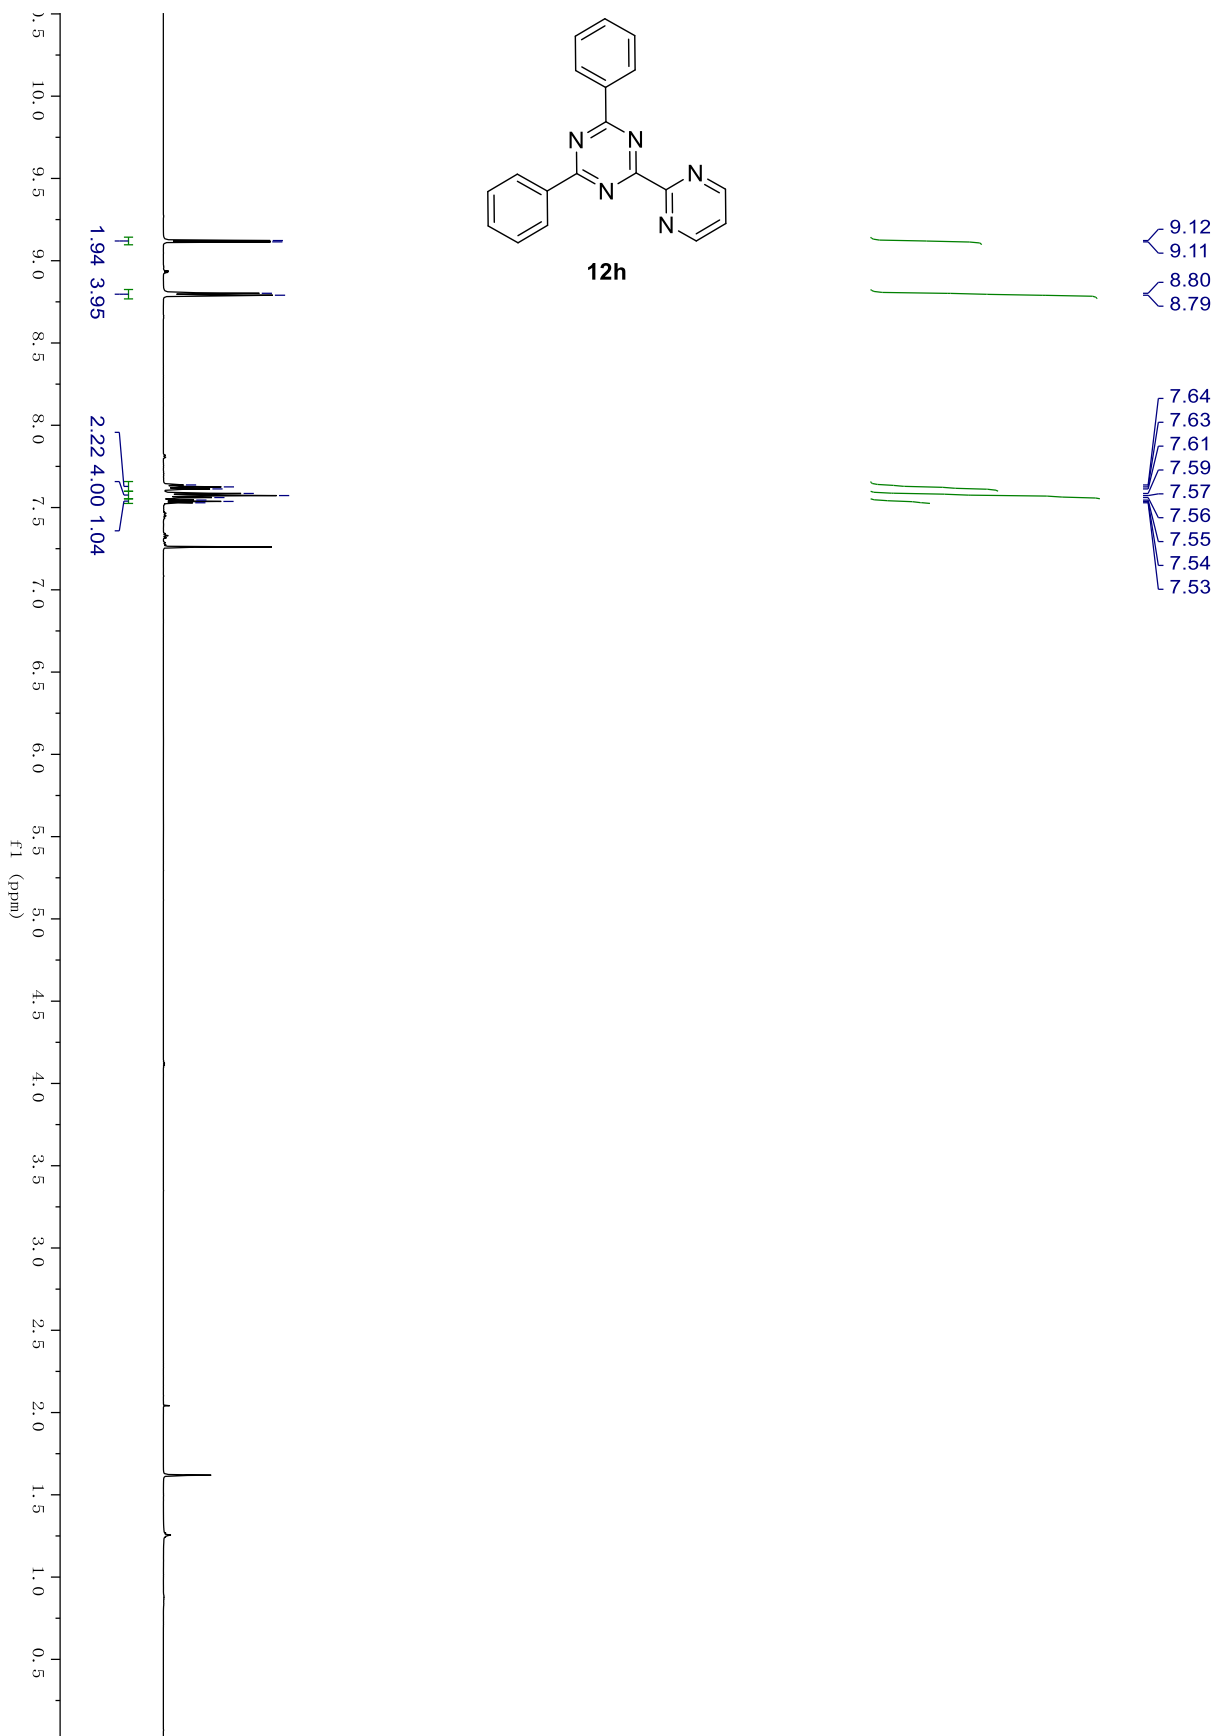

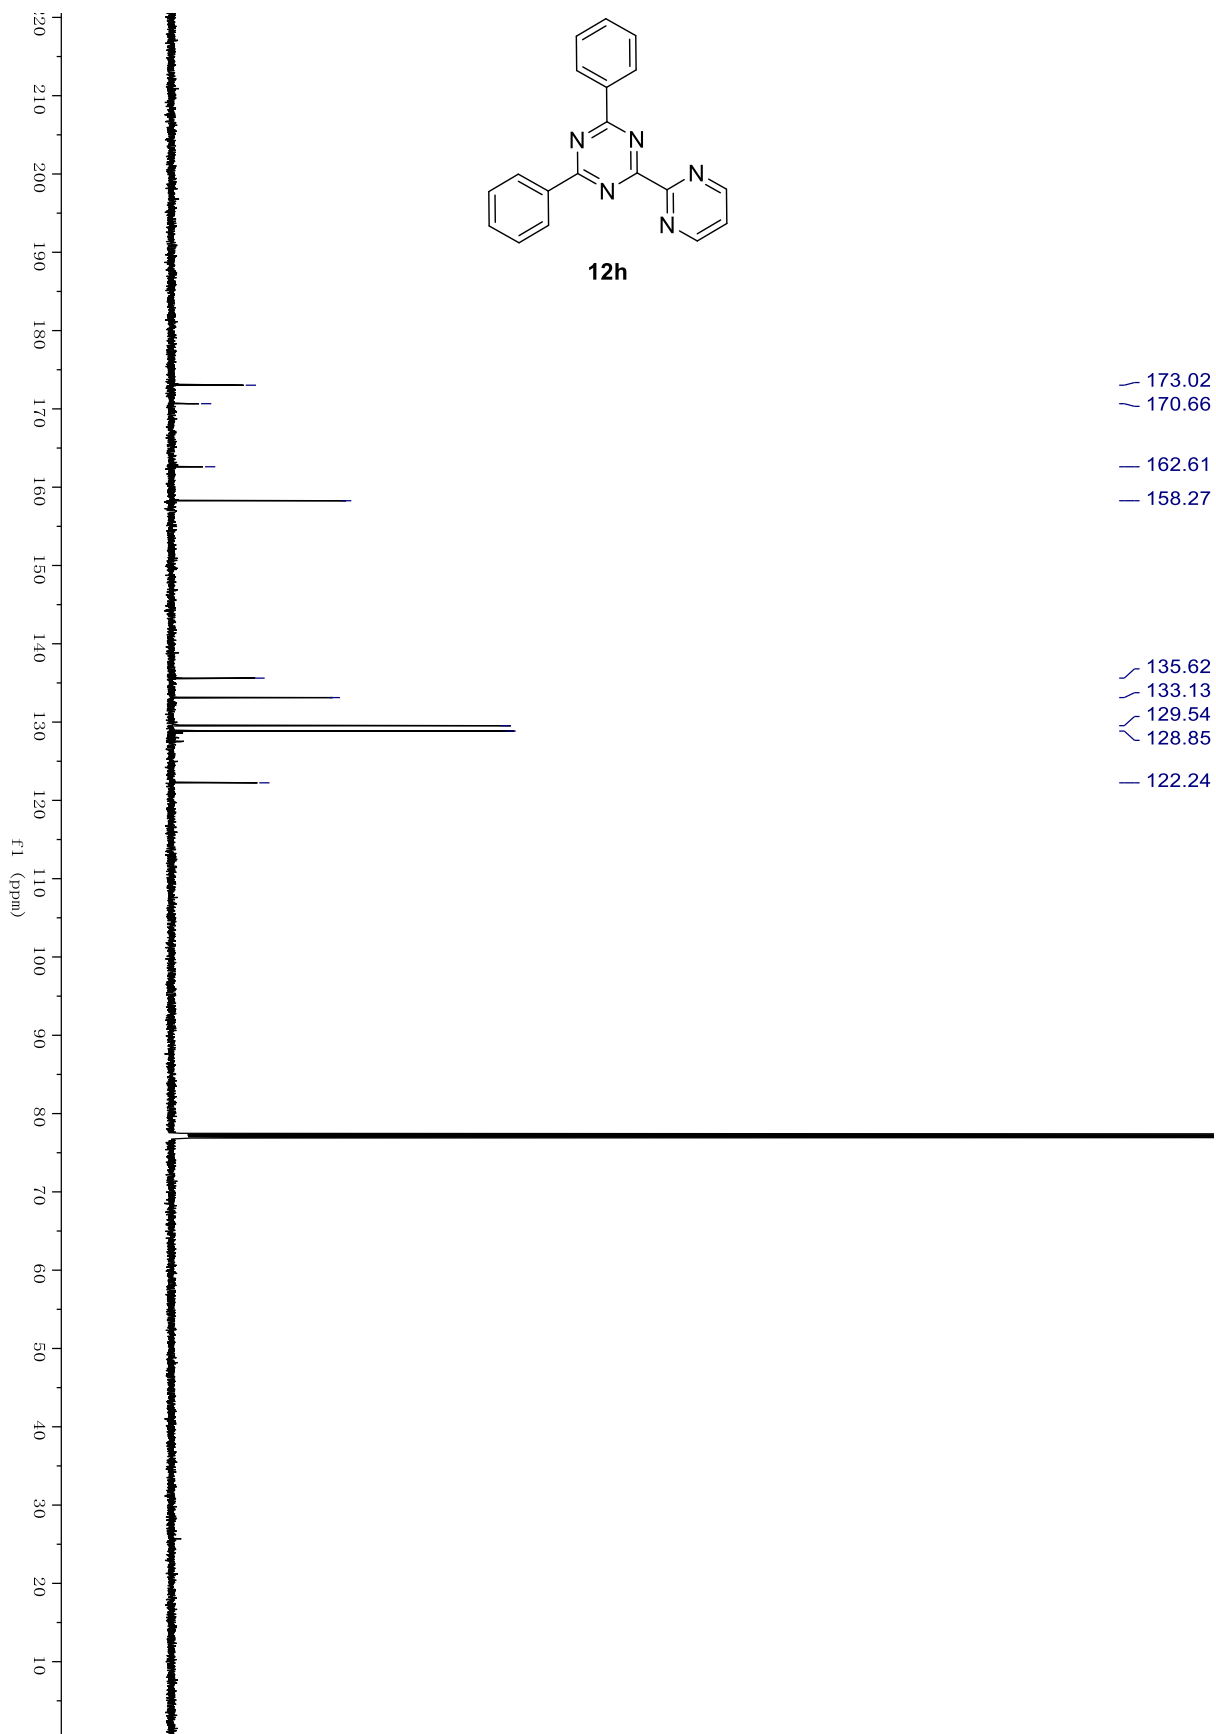

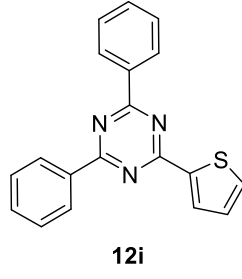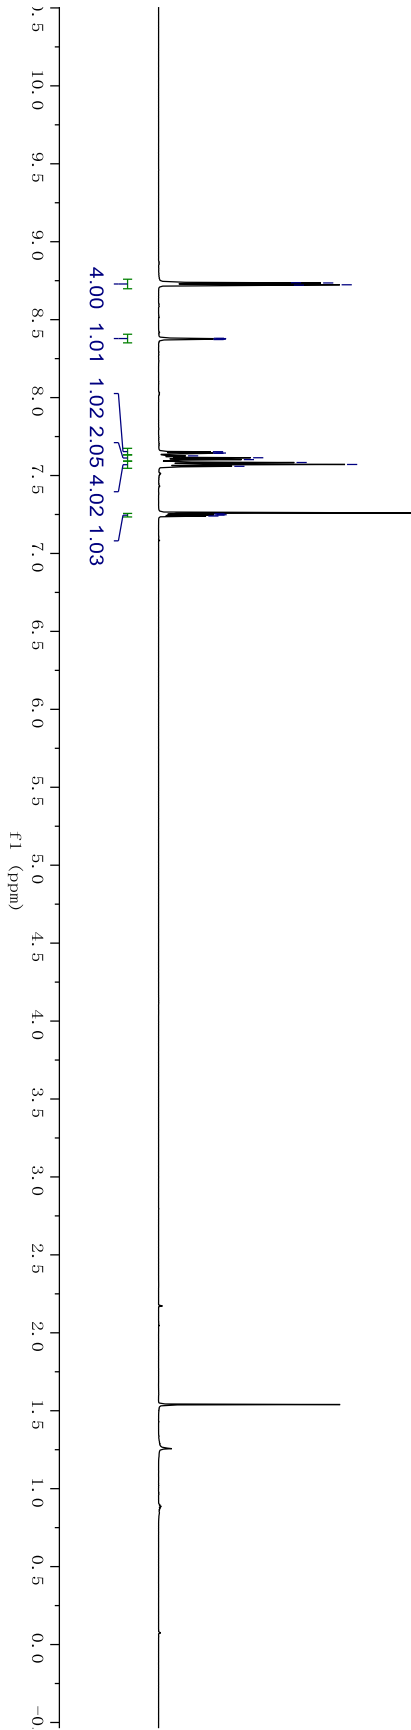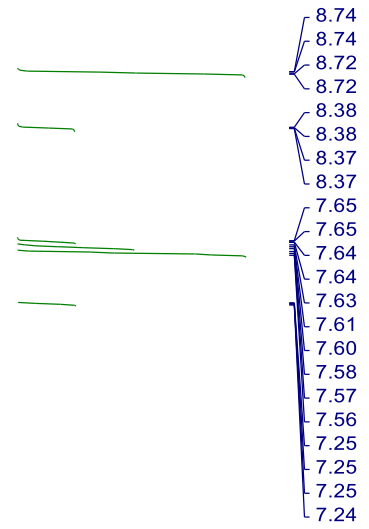

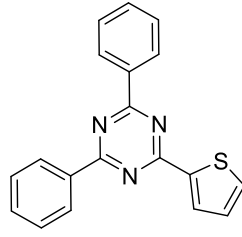

**12i**

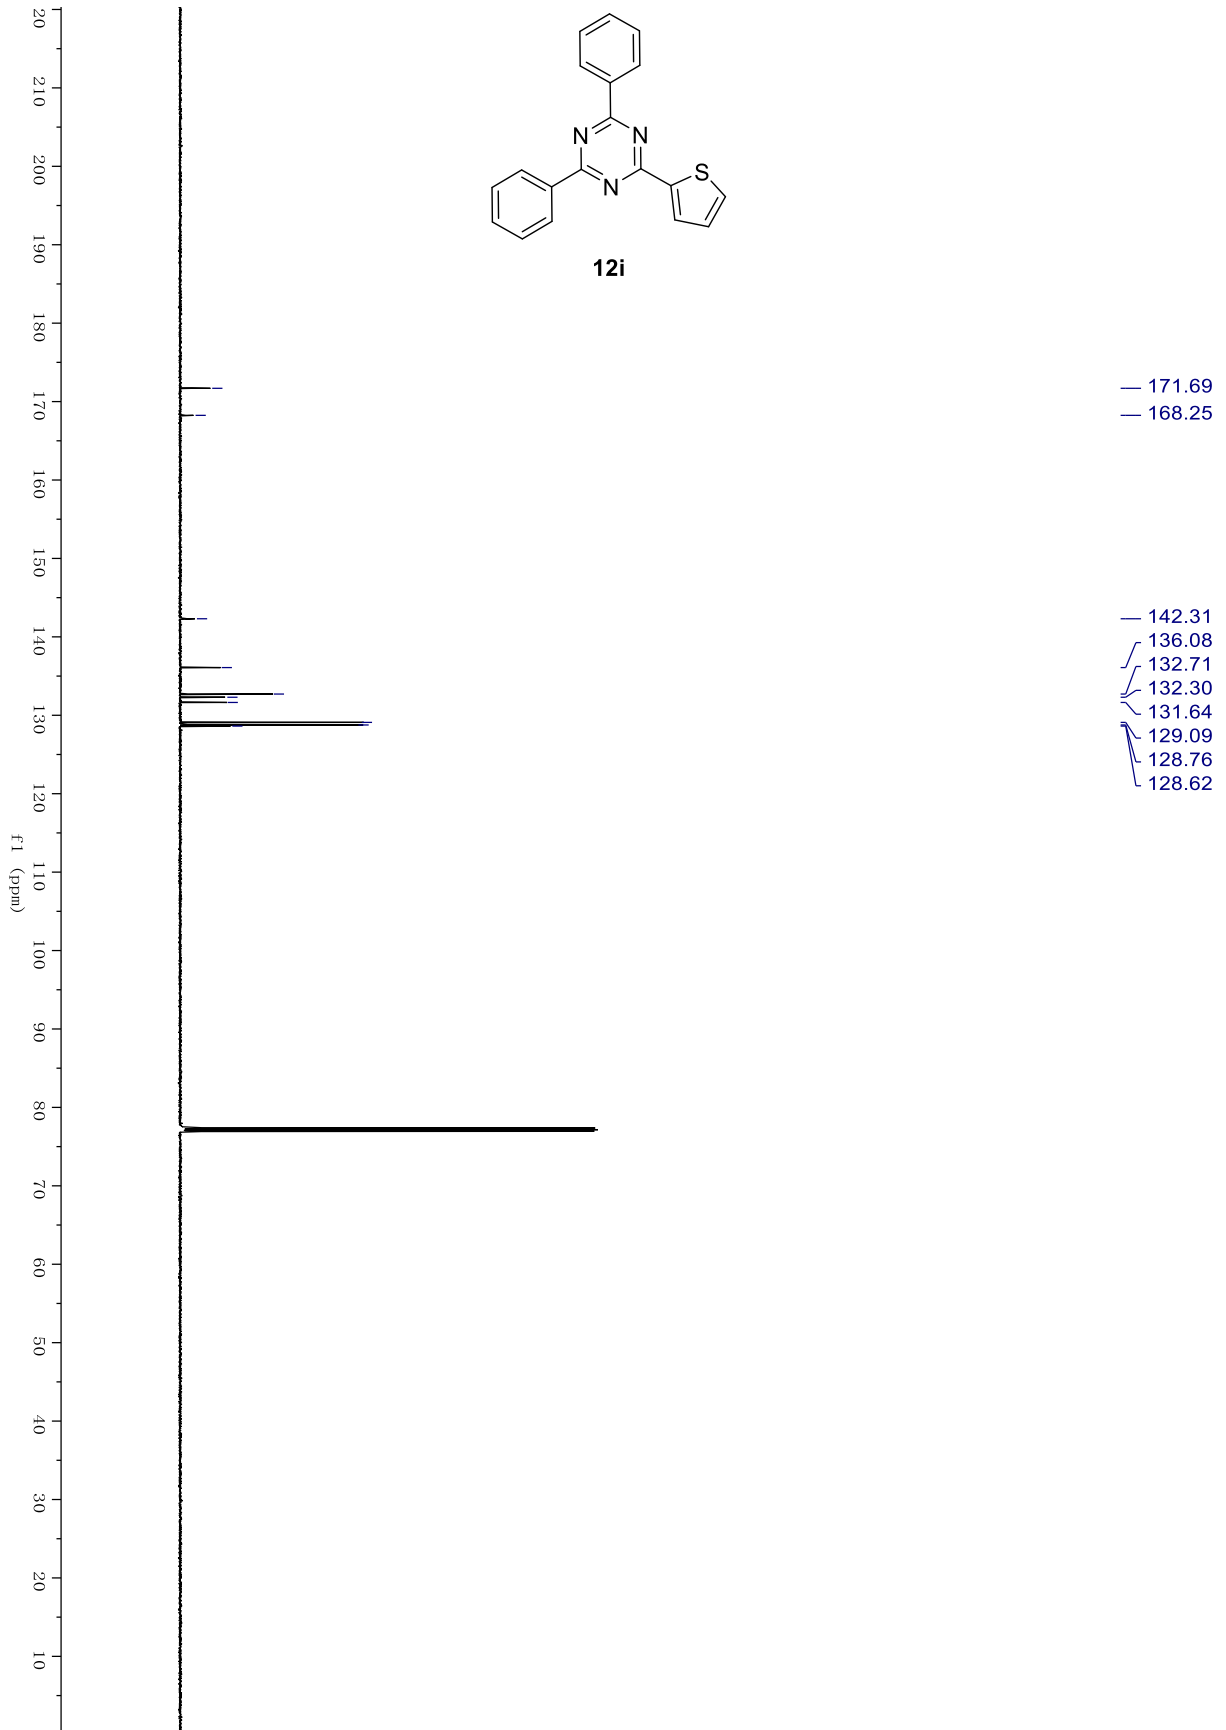

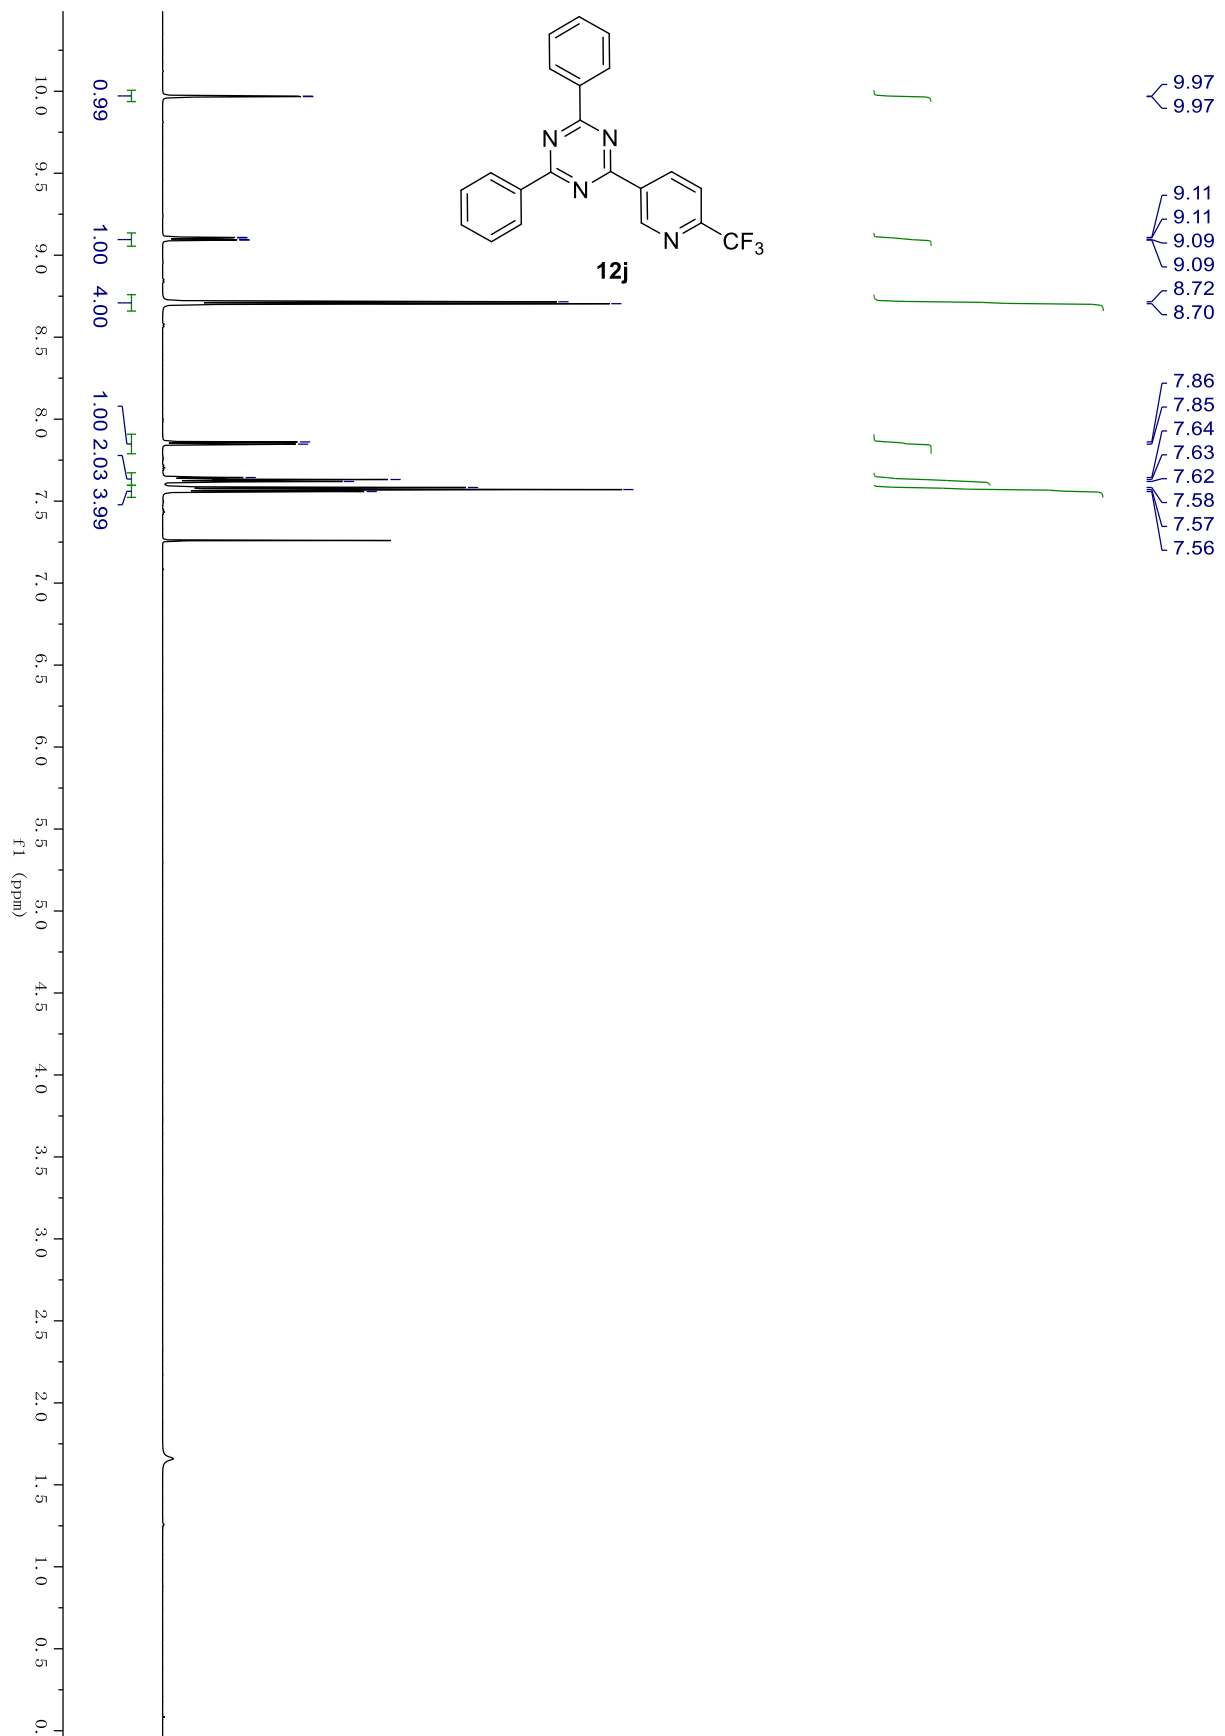

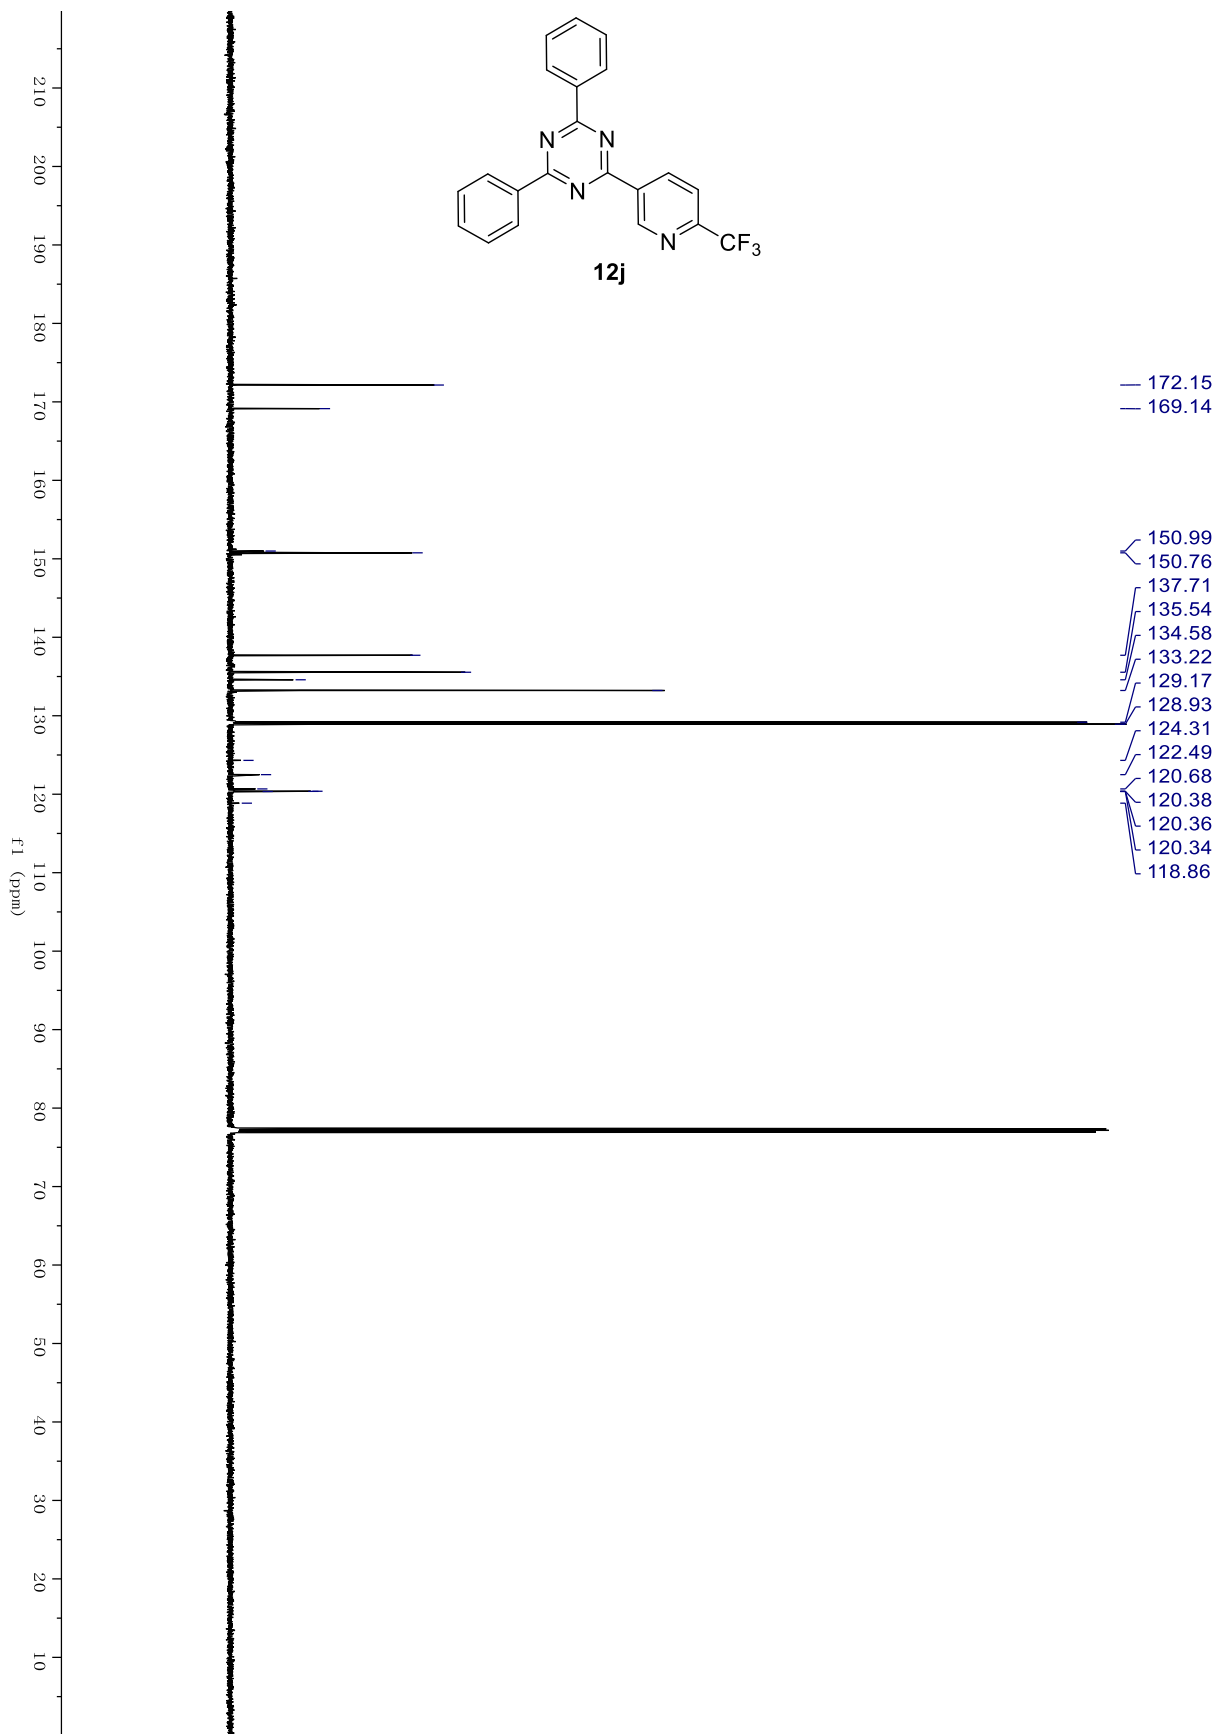

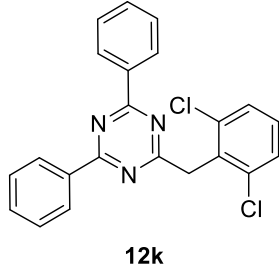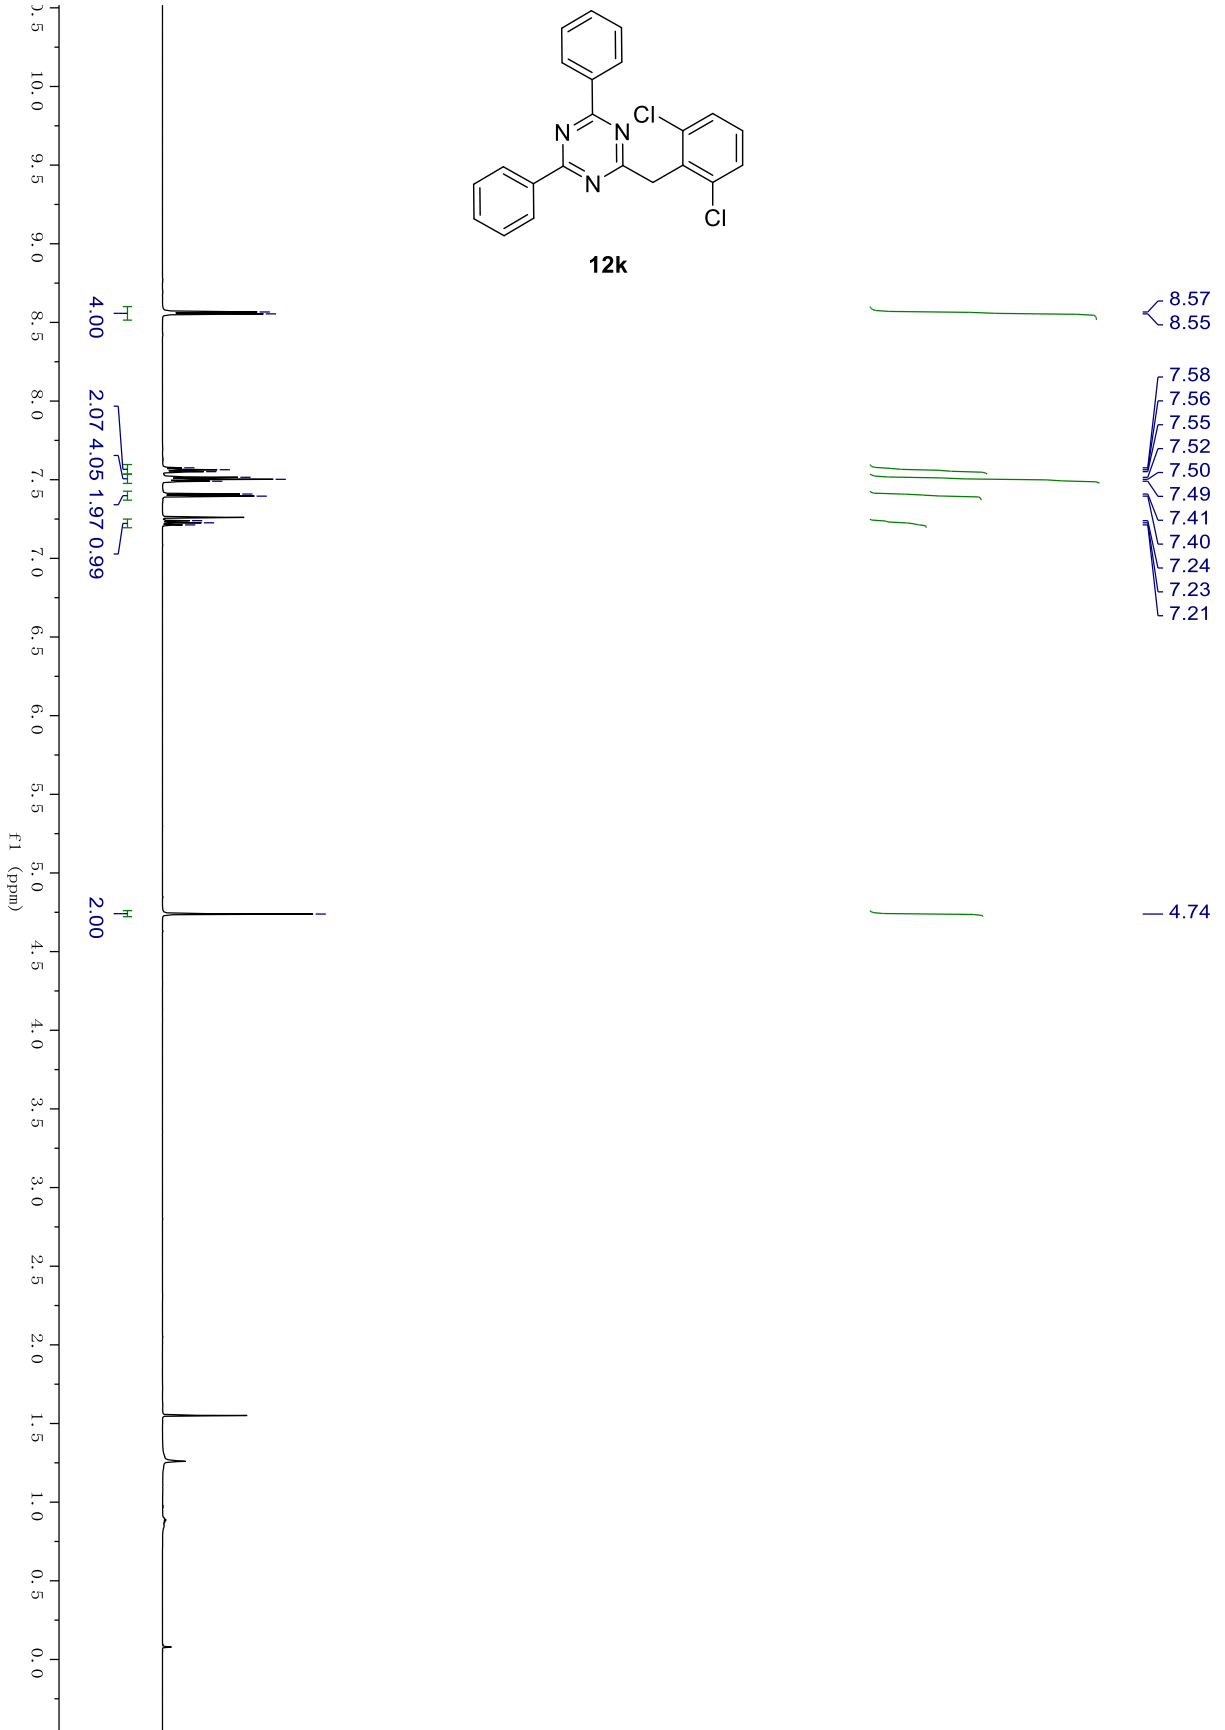

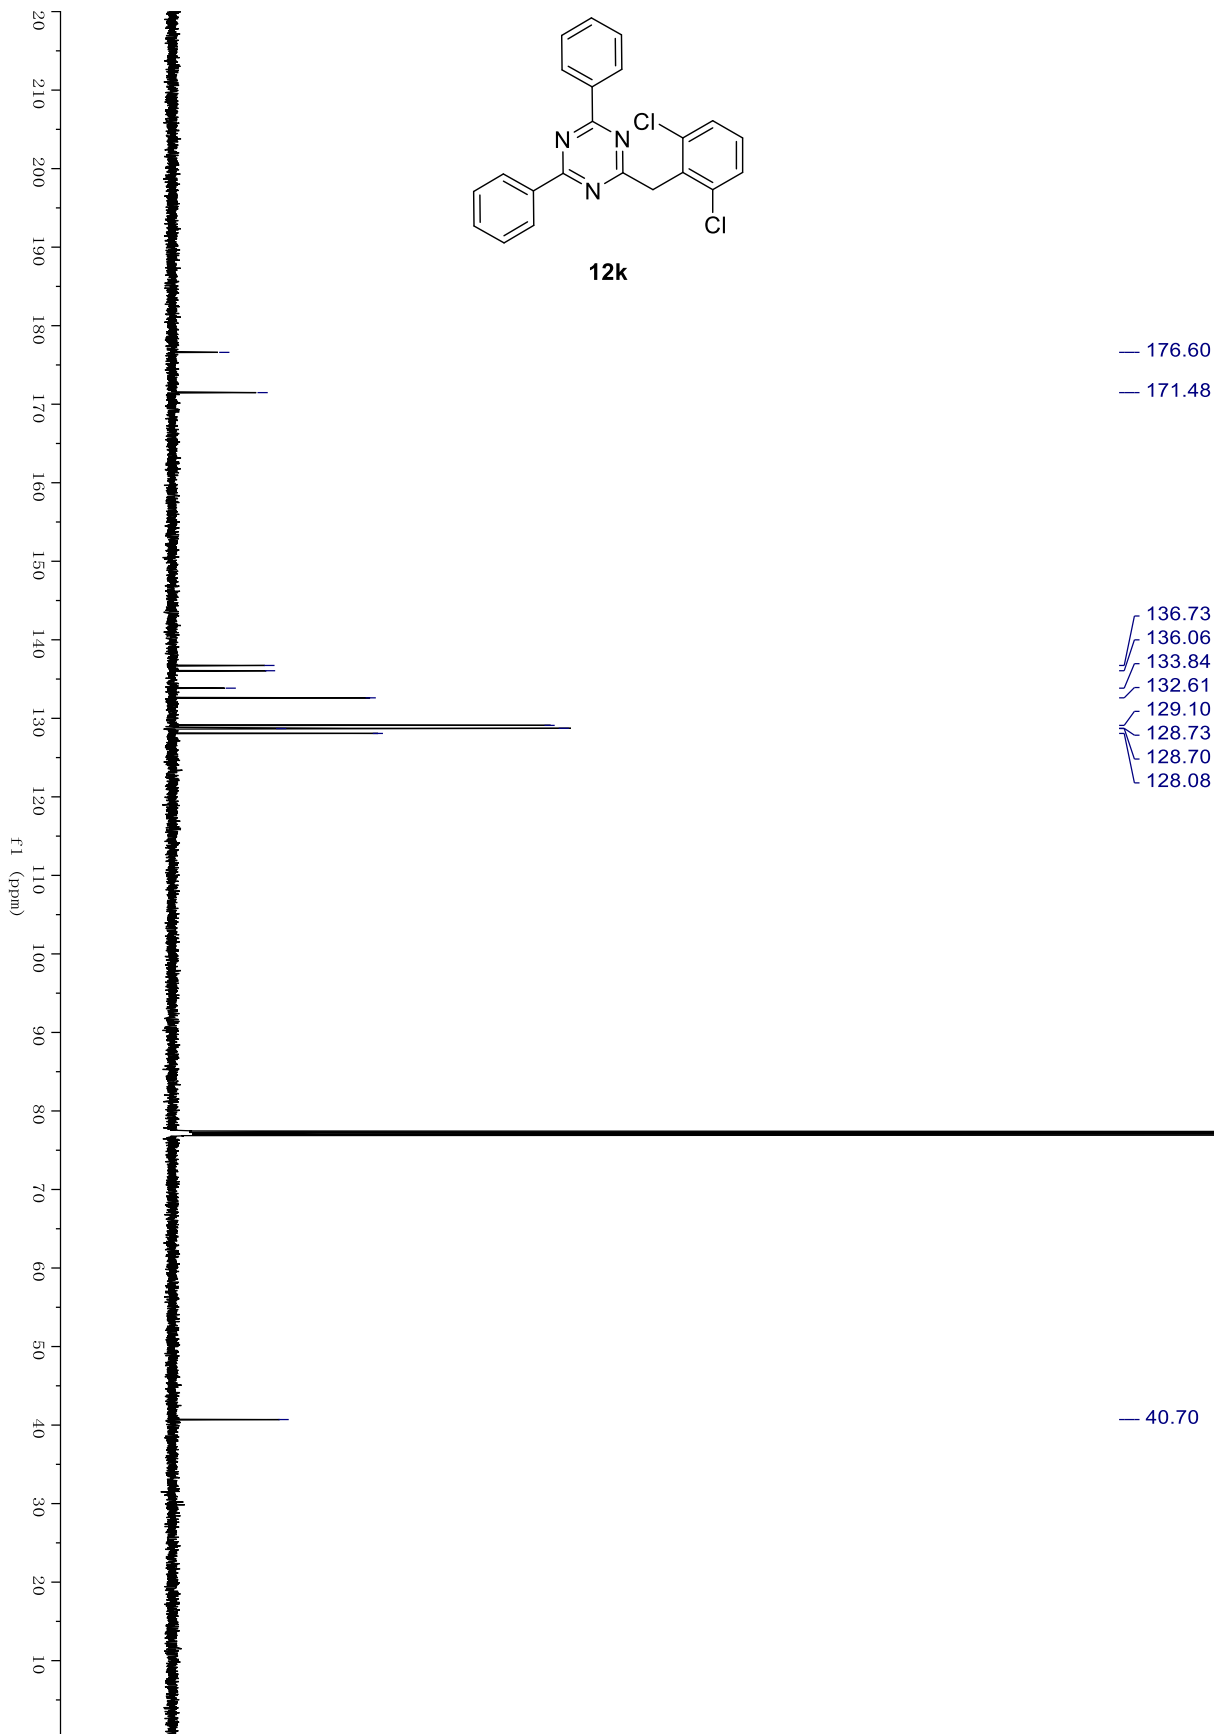



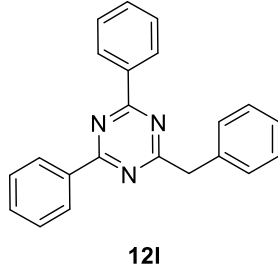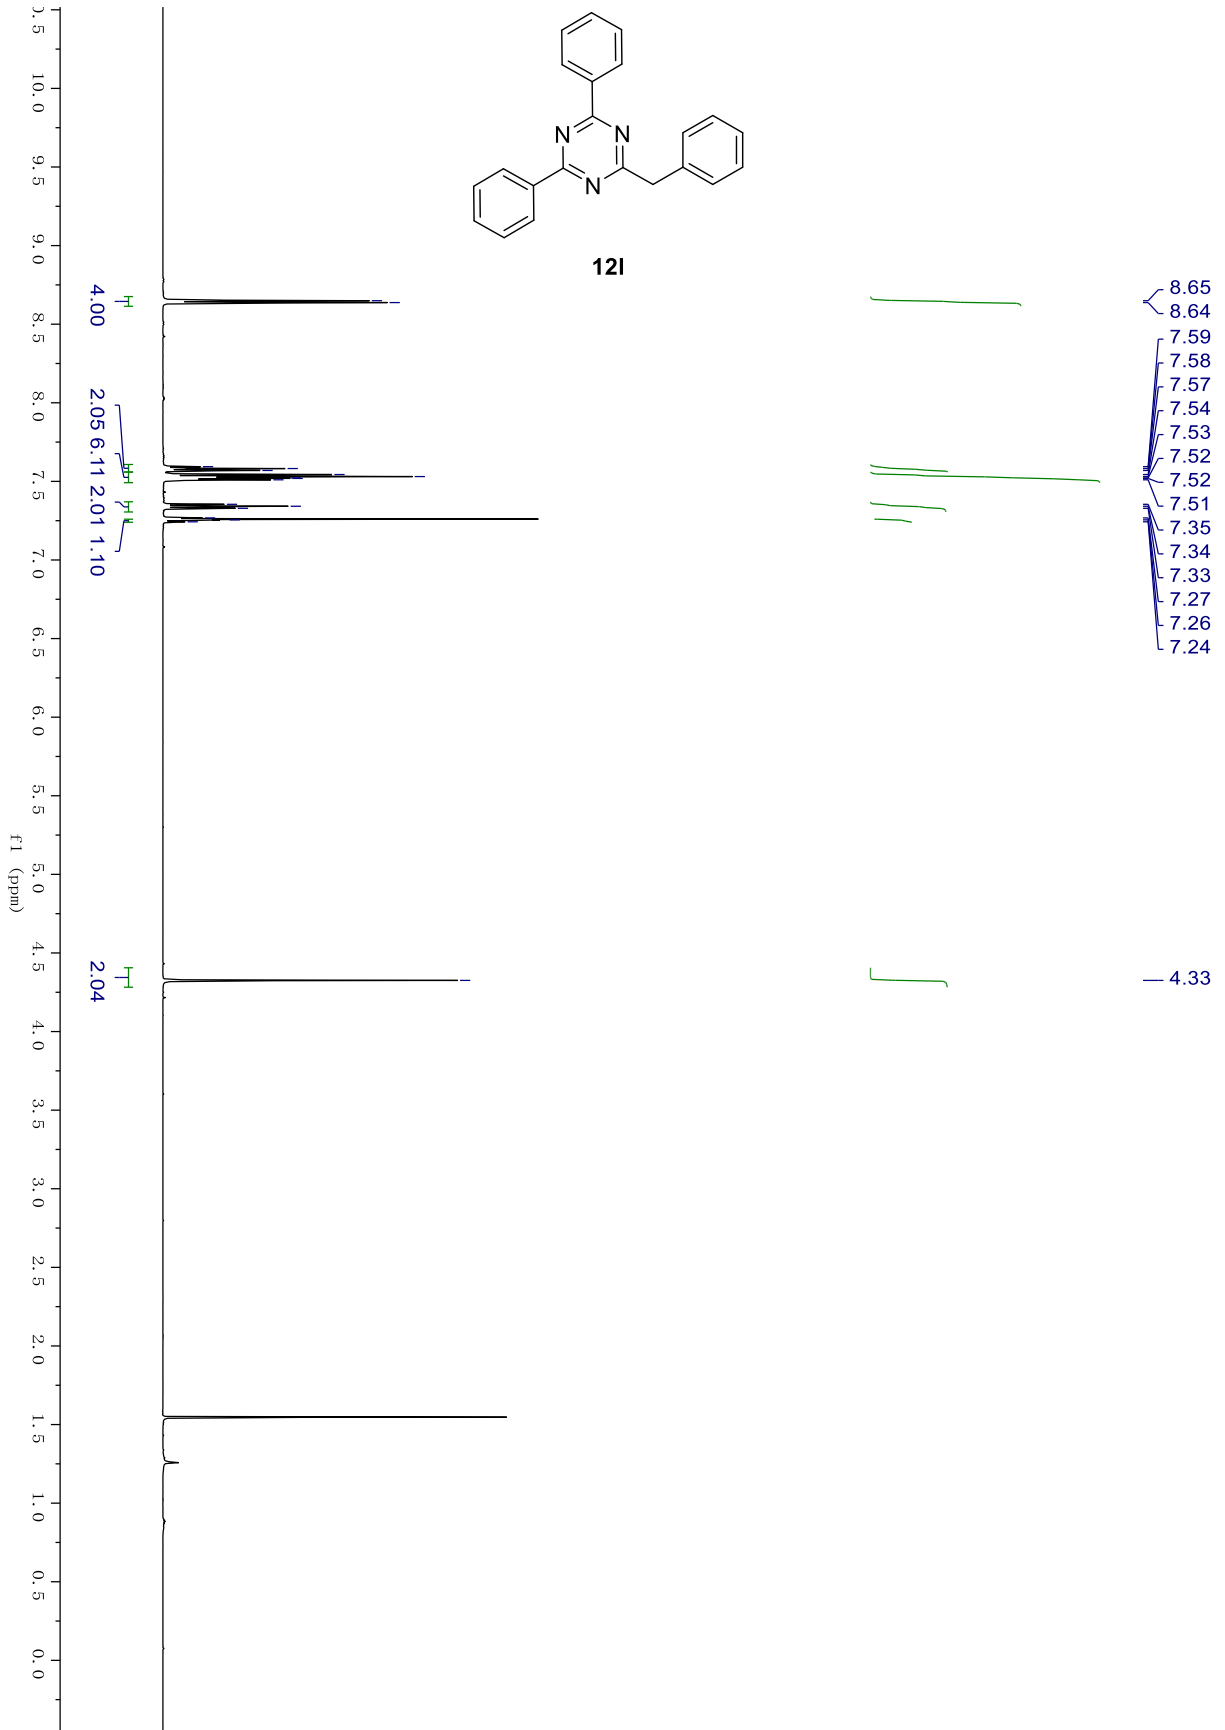

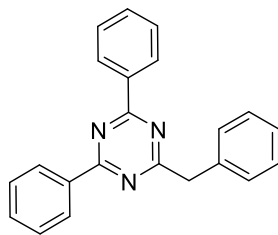

121

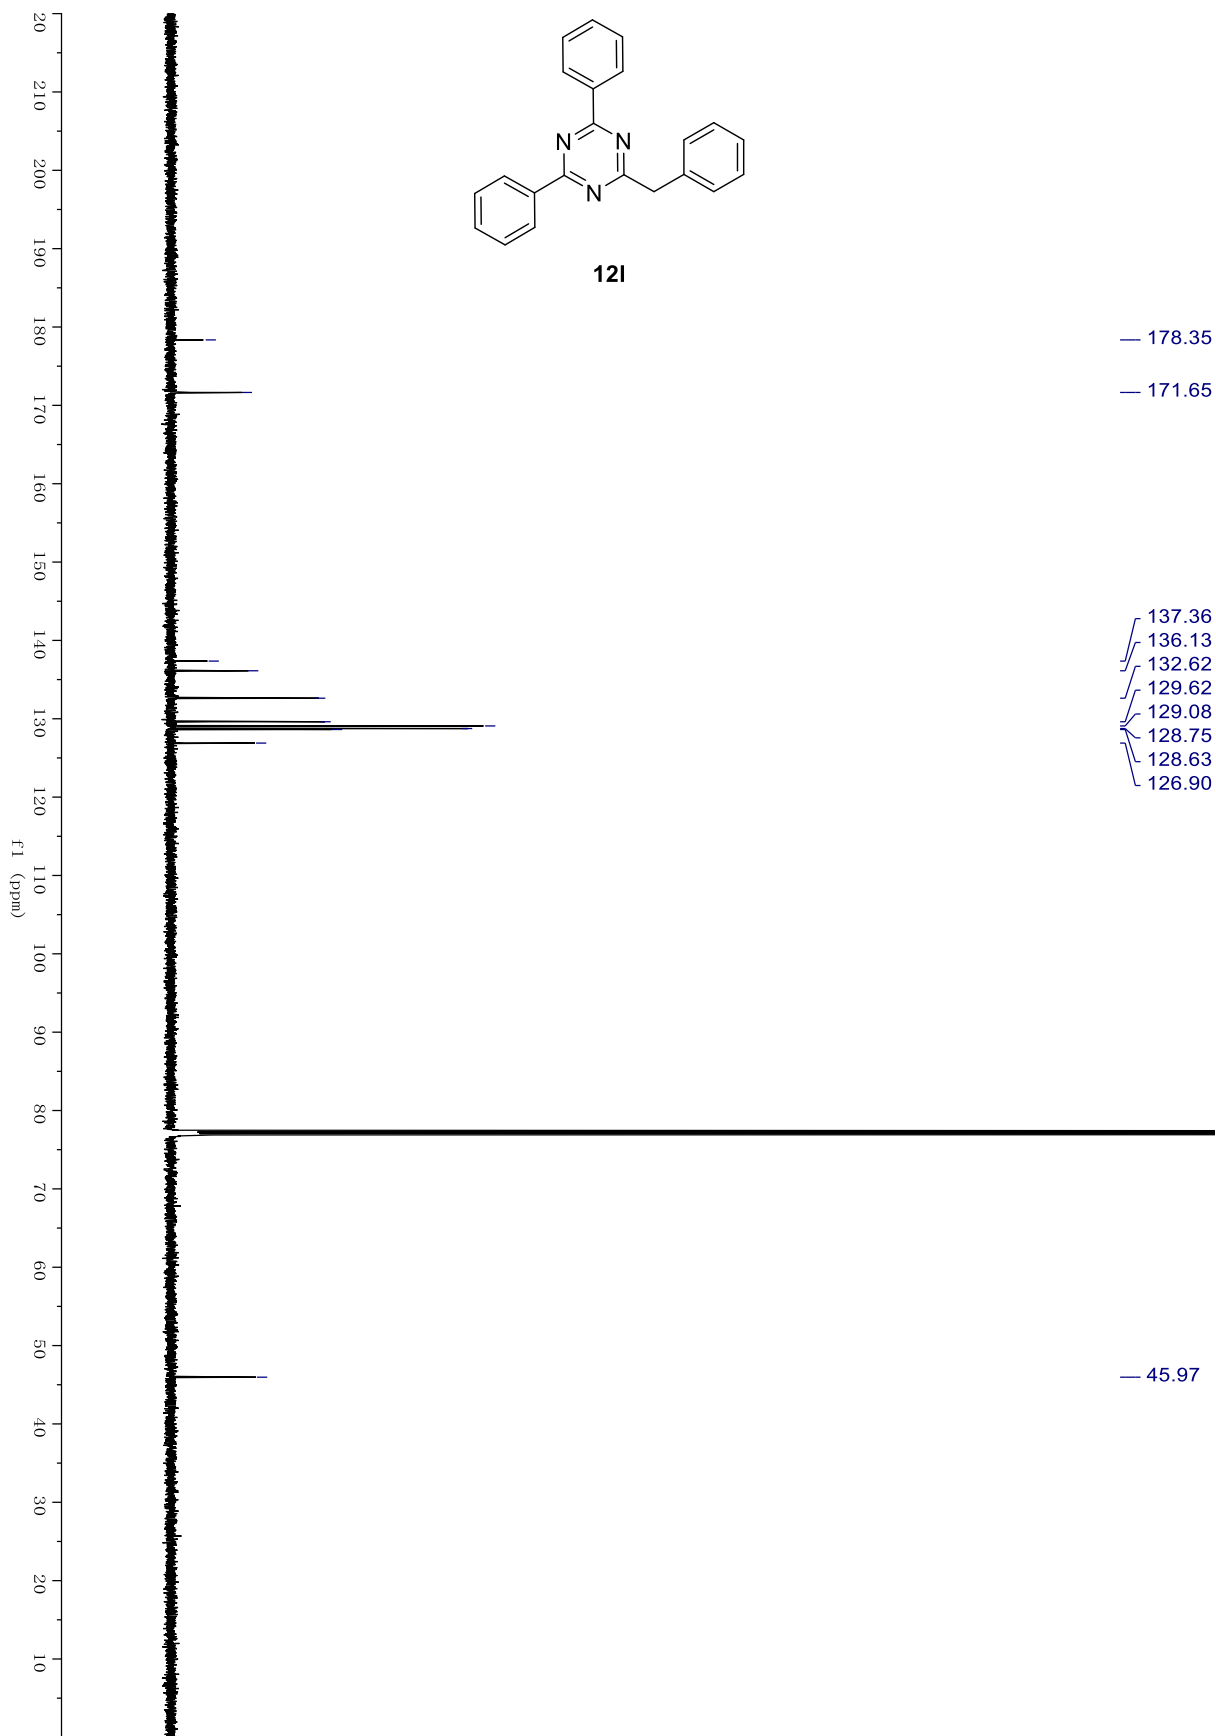

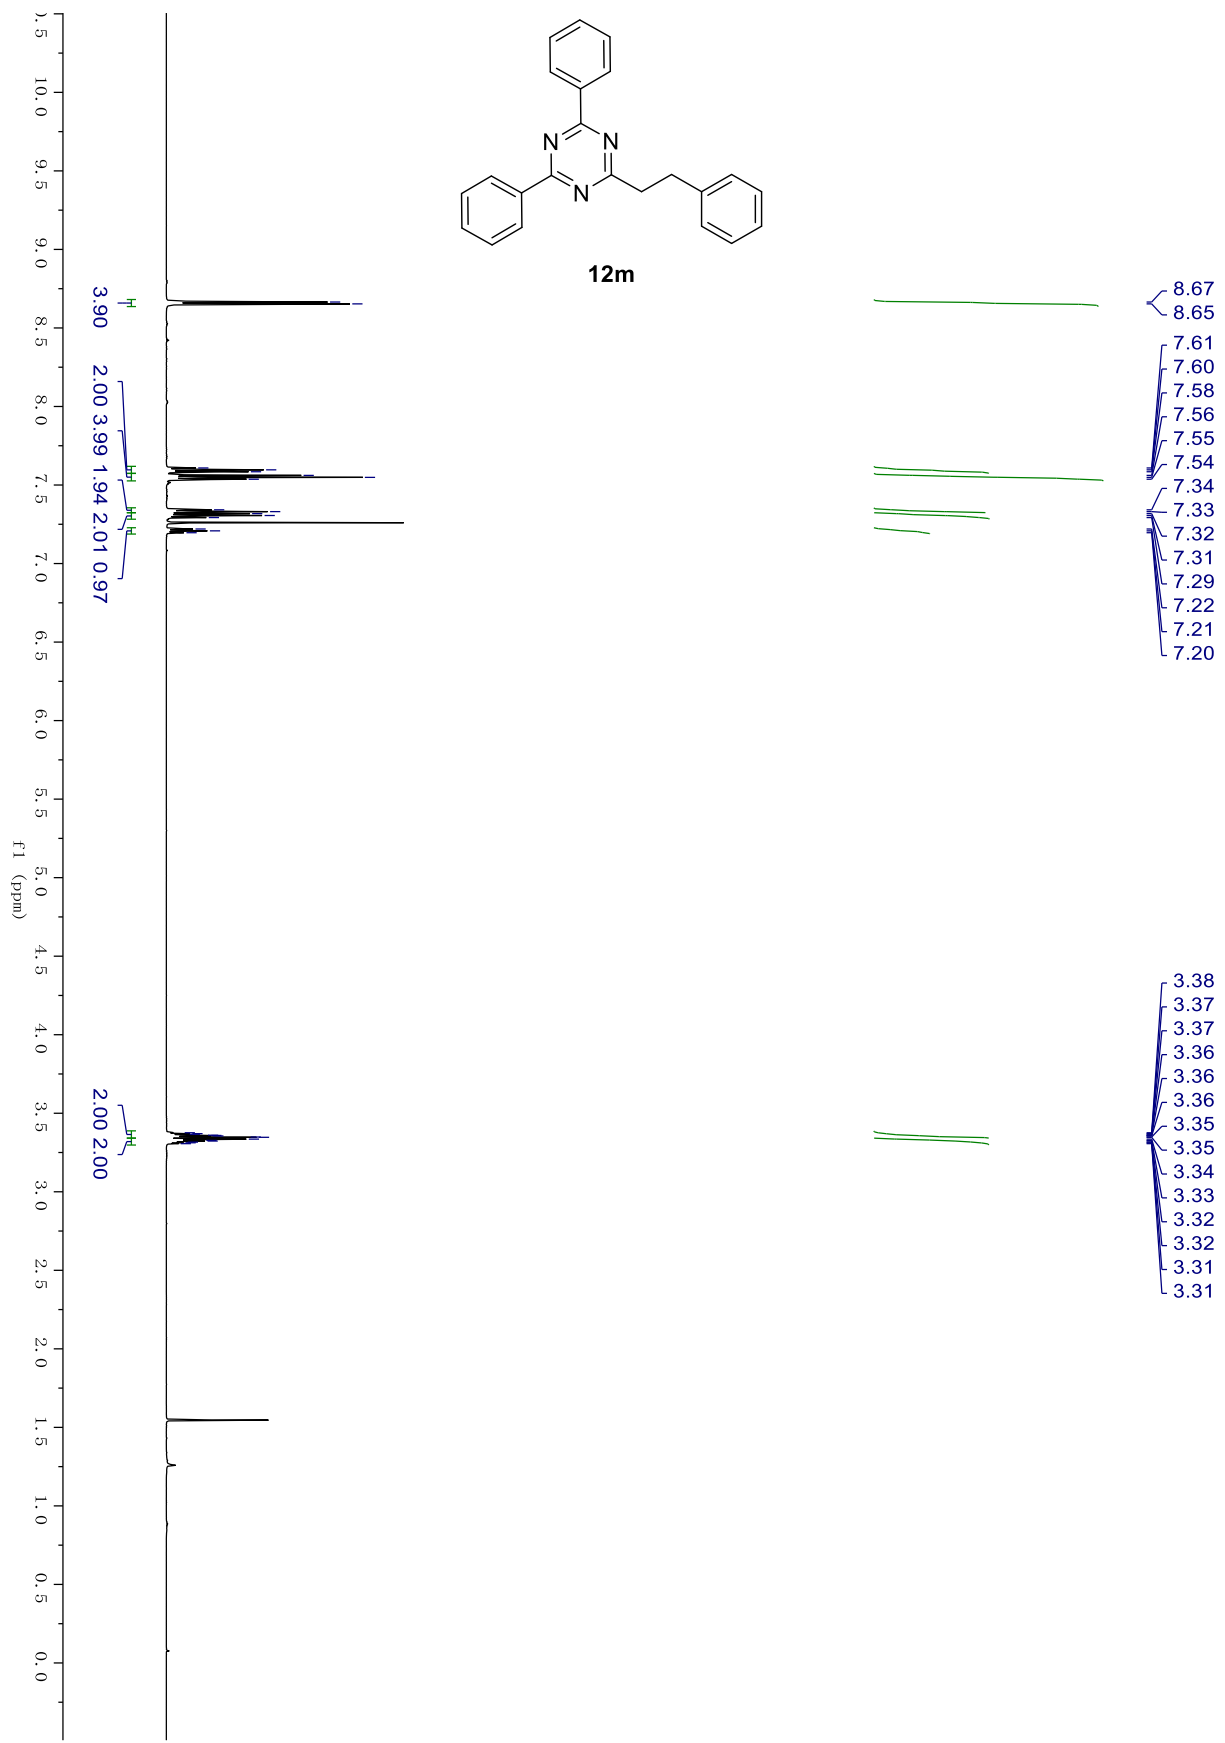

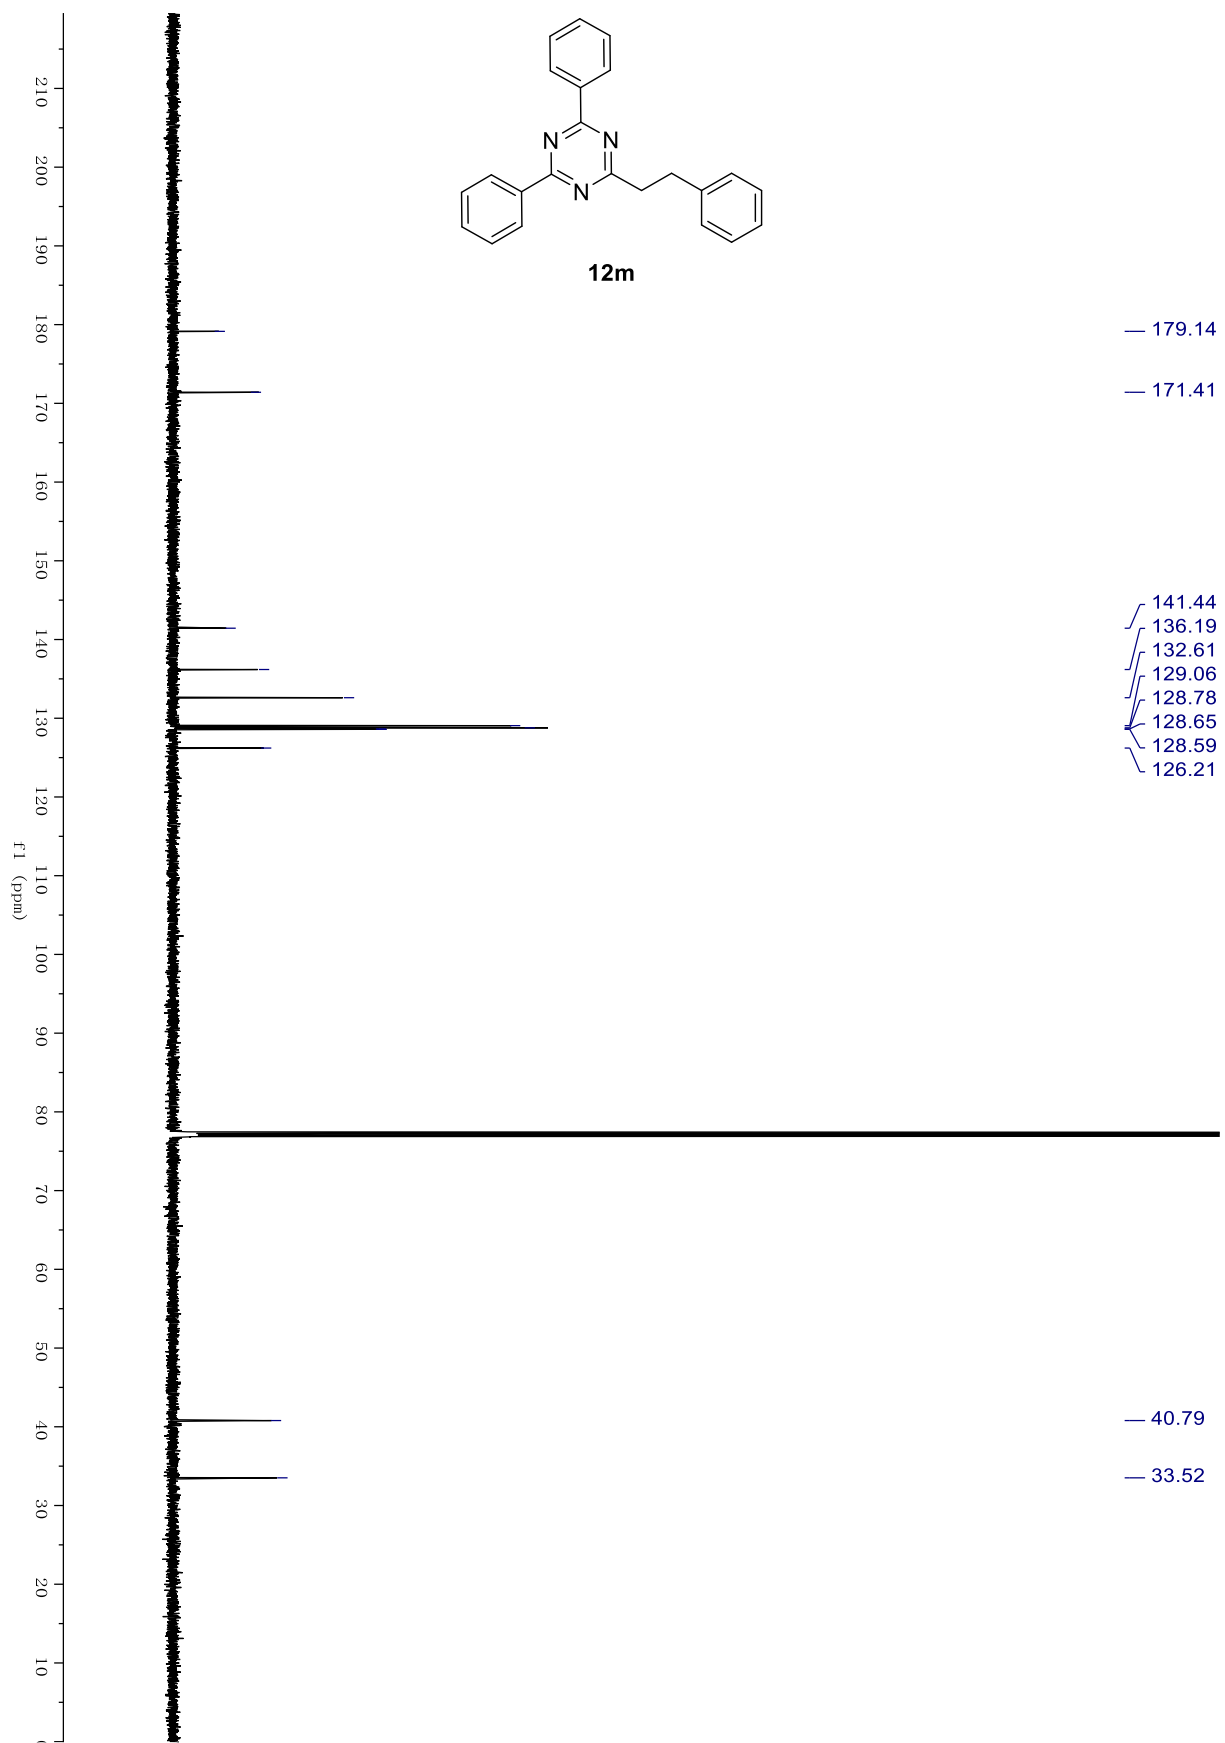

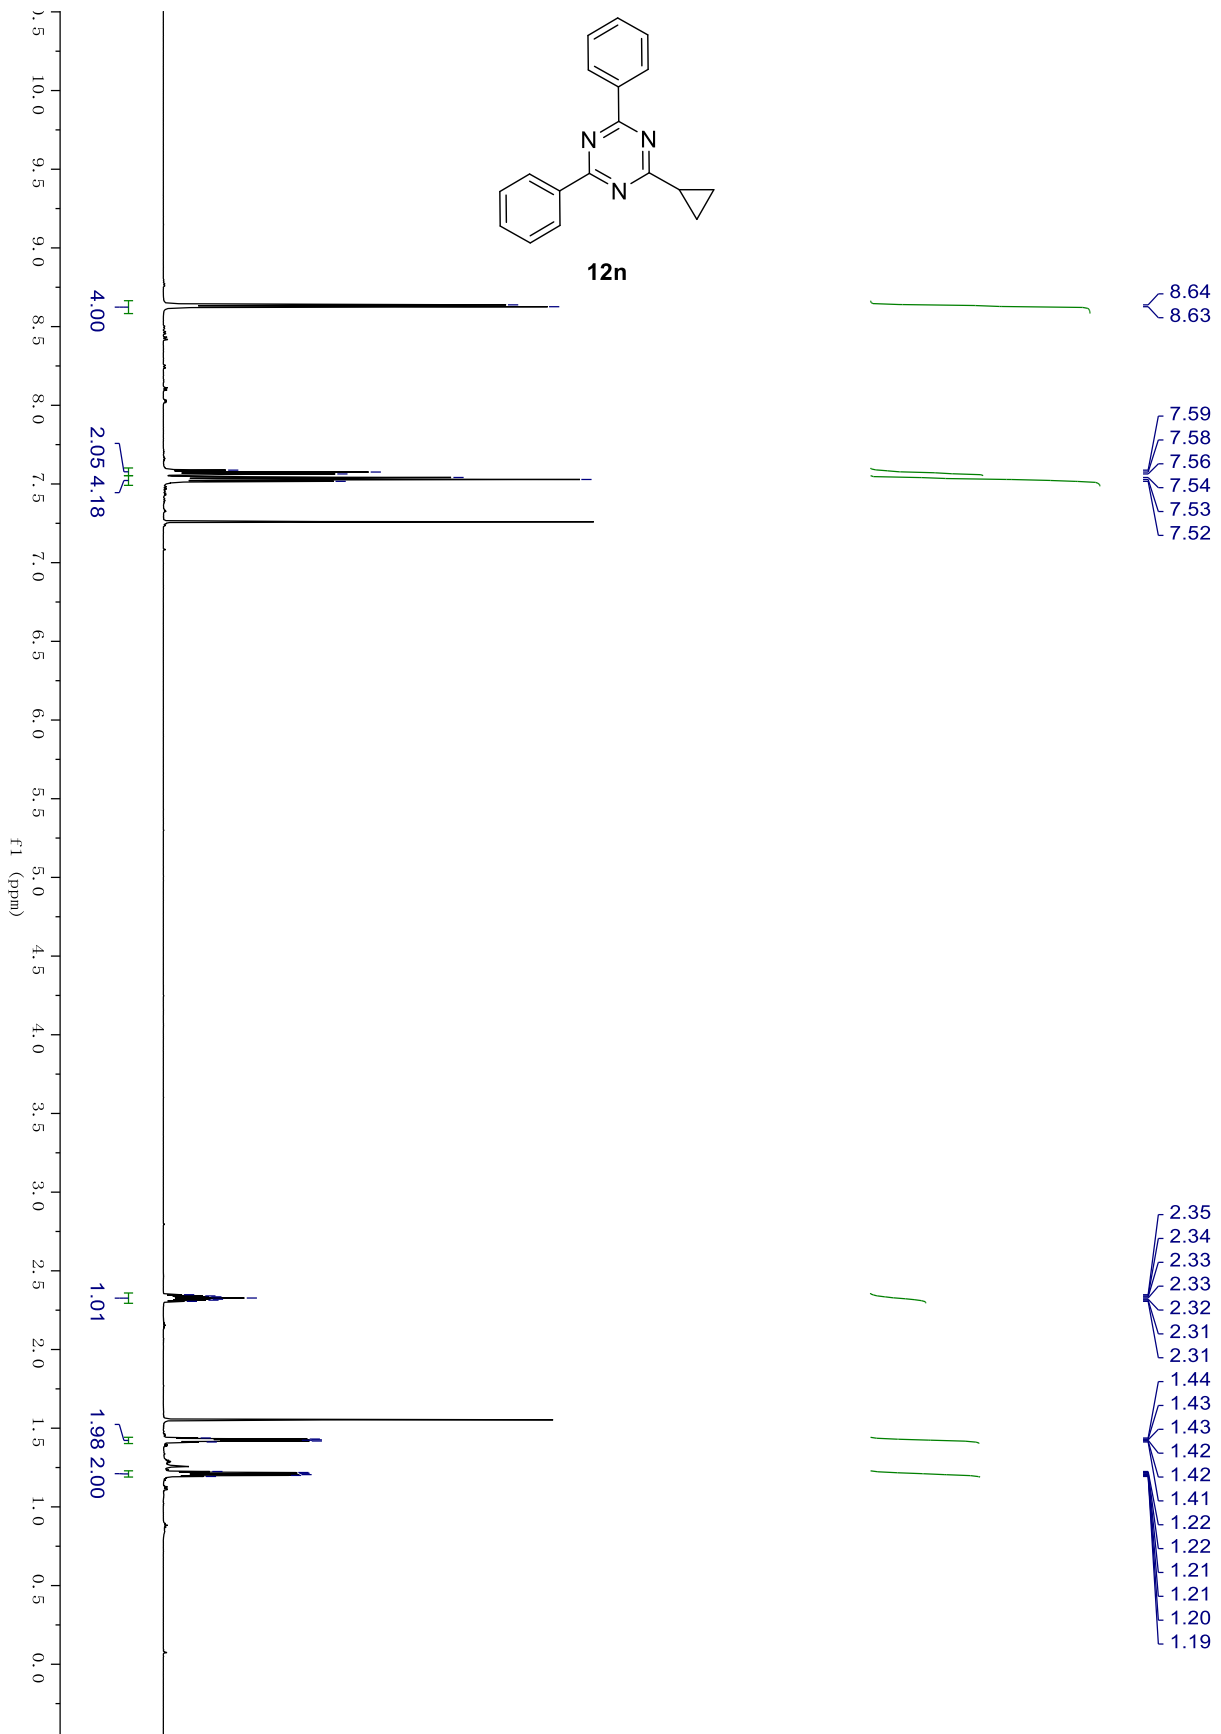

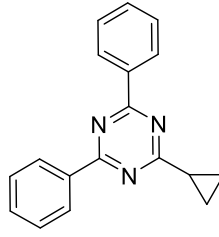

**12n**

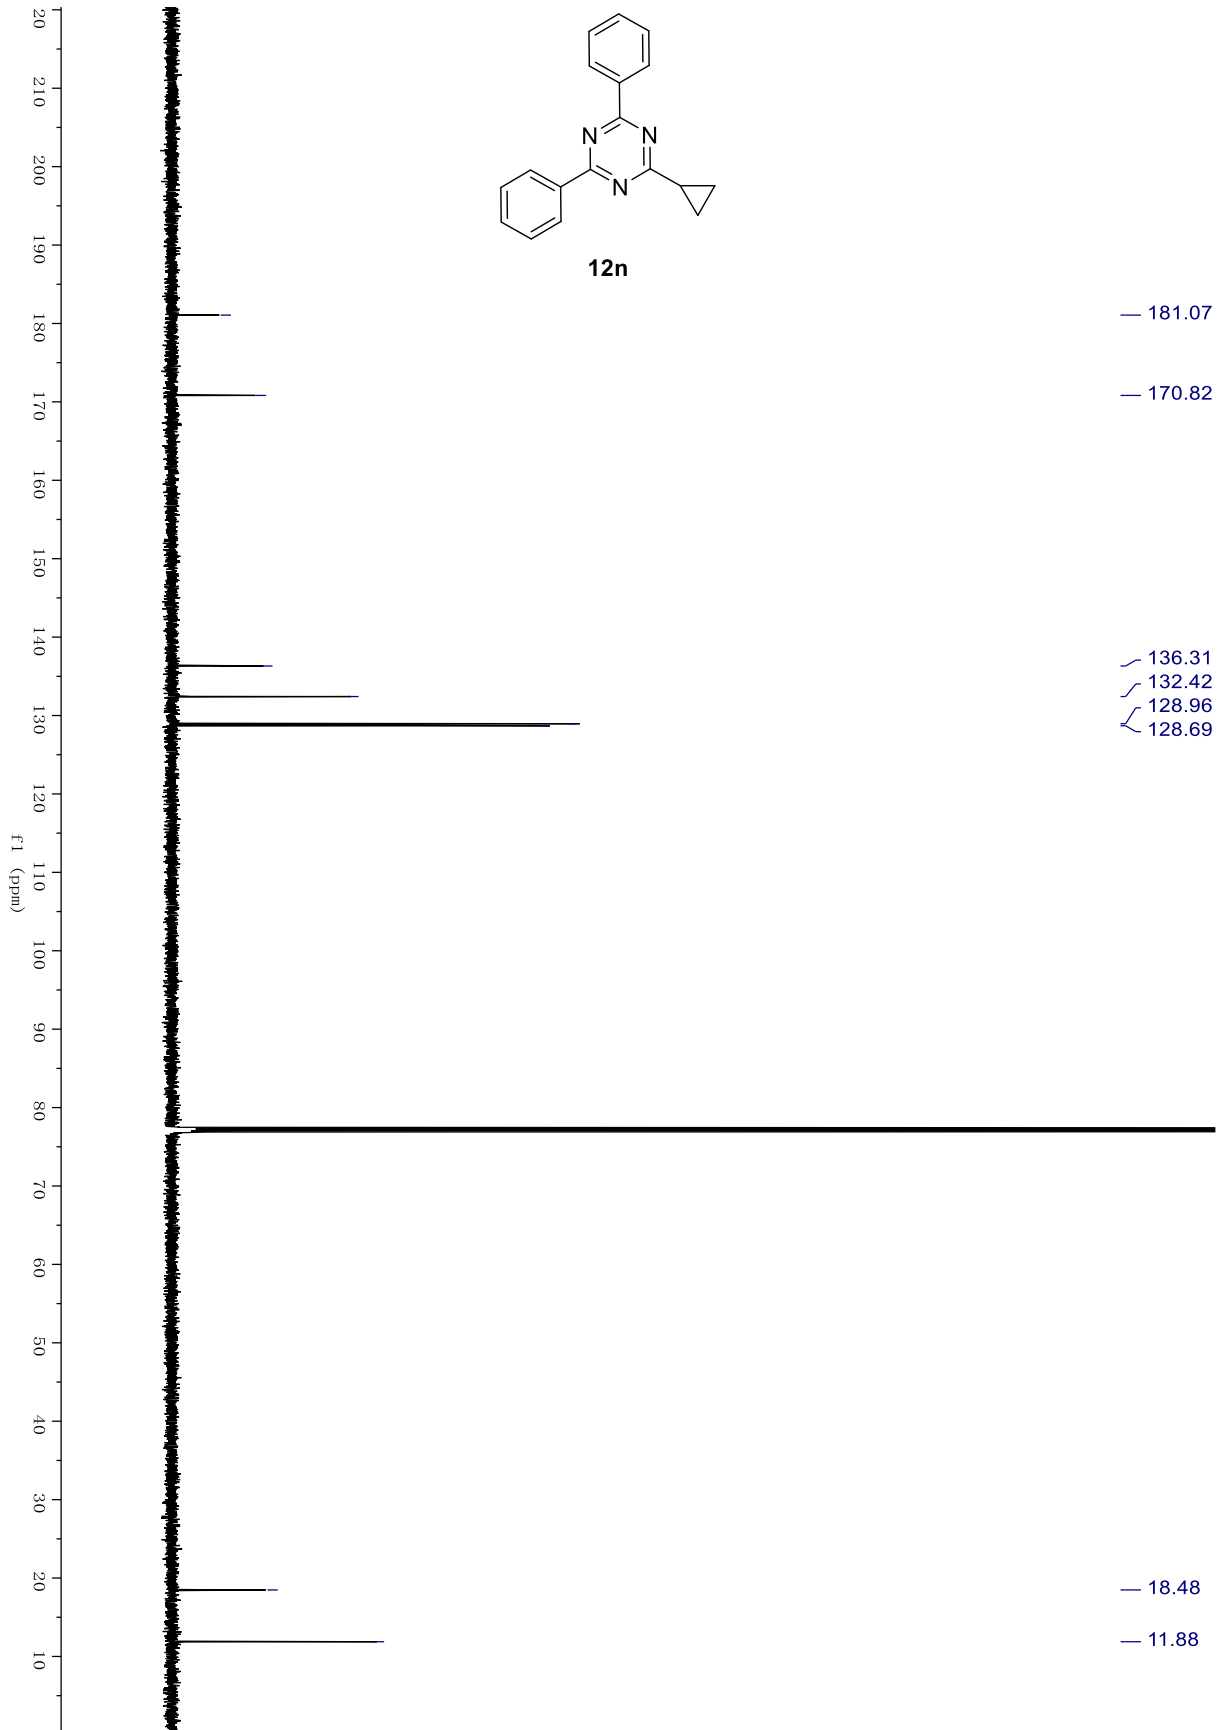

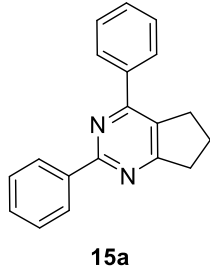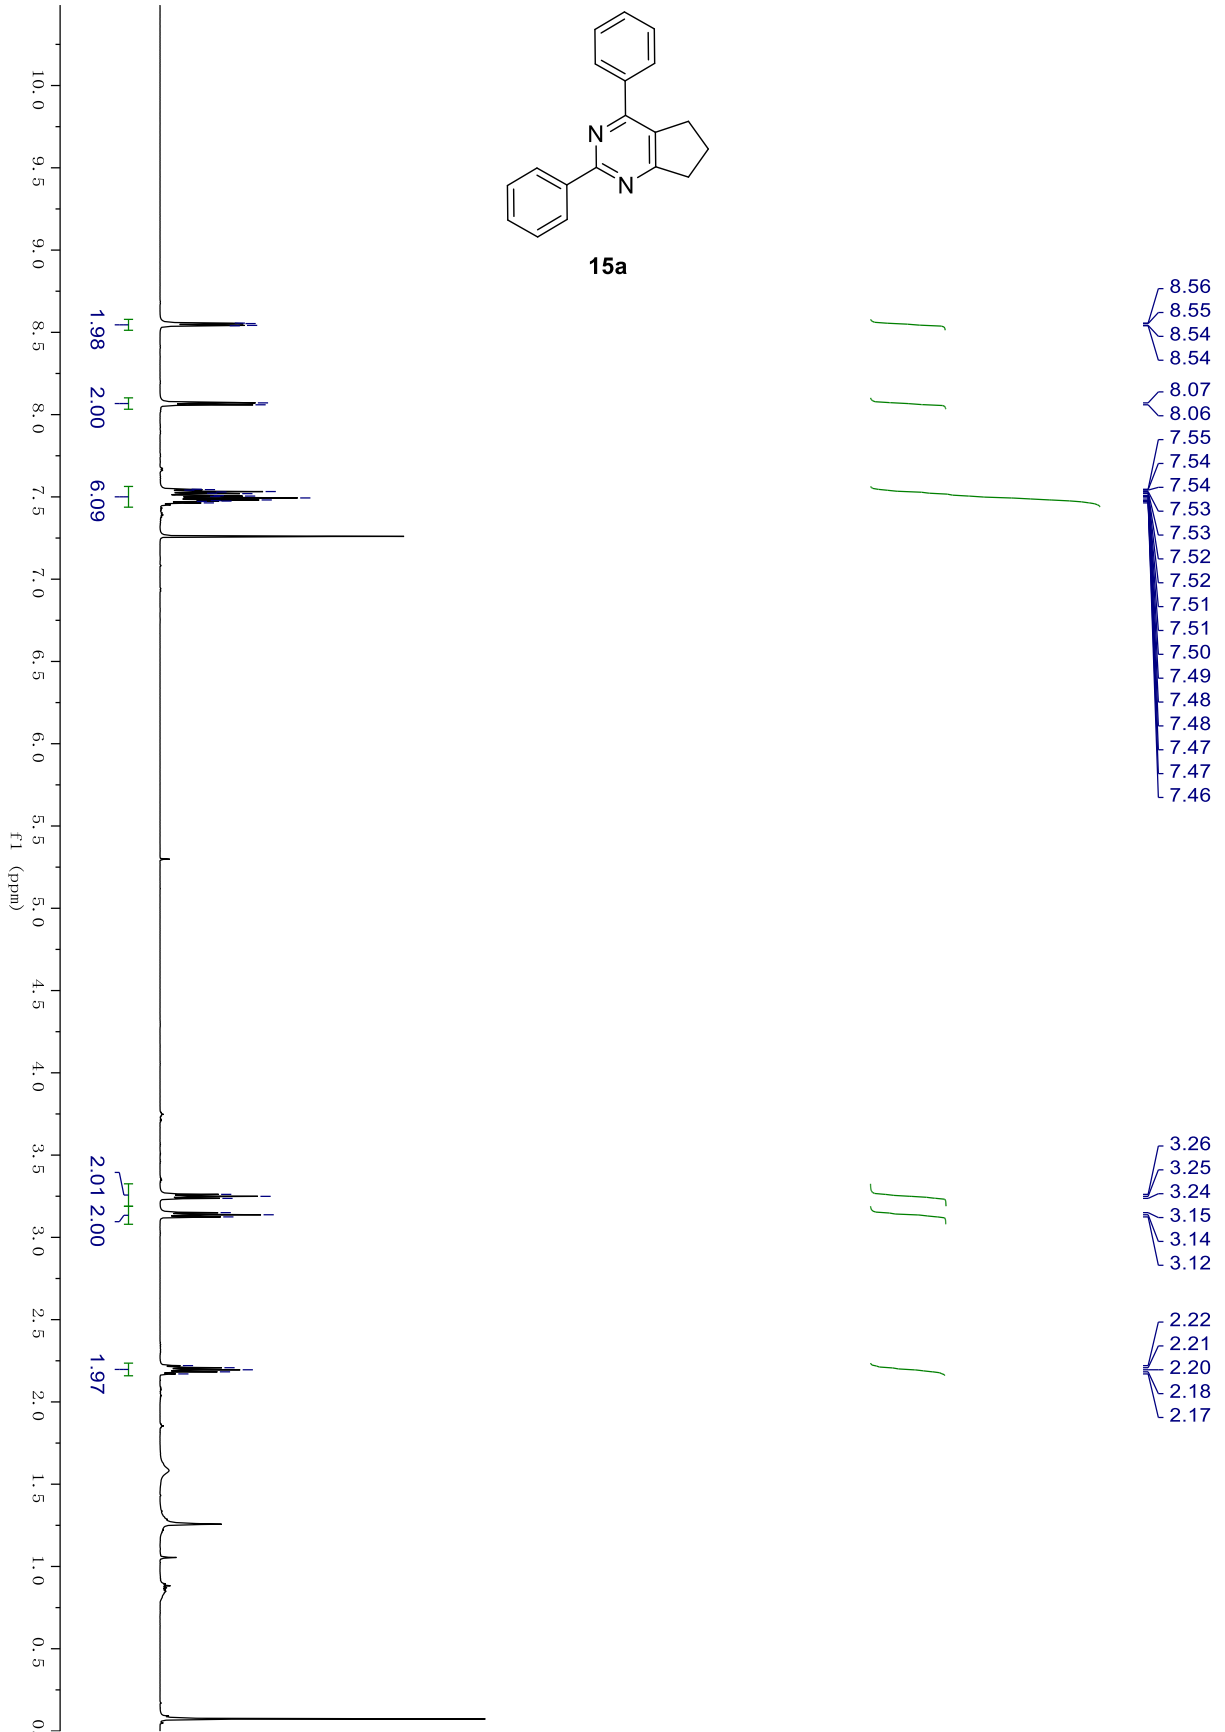

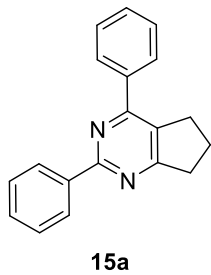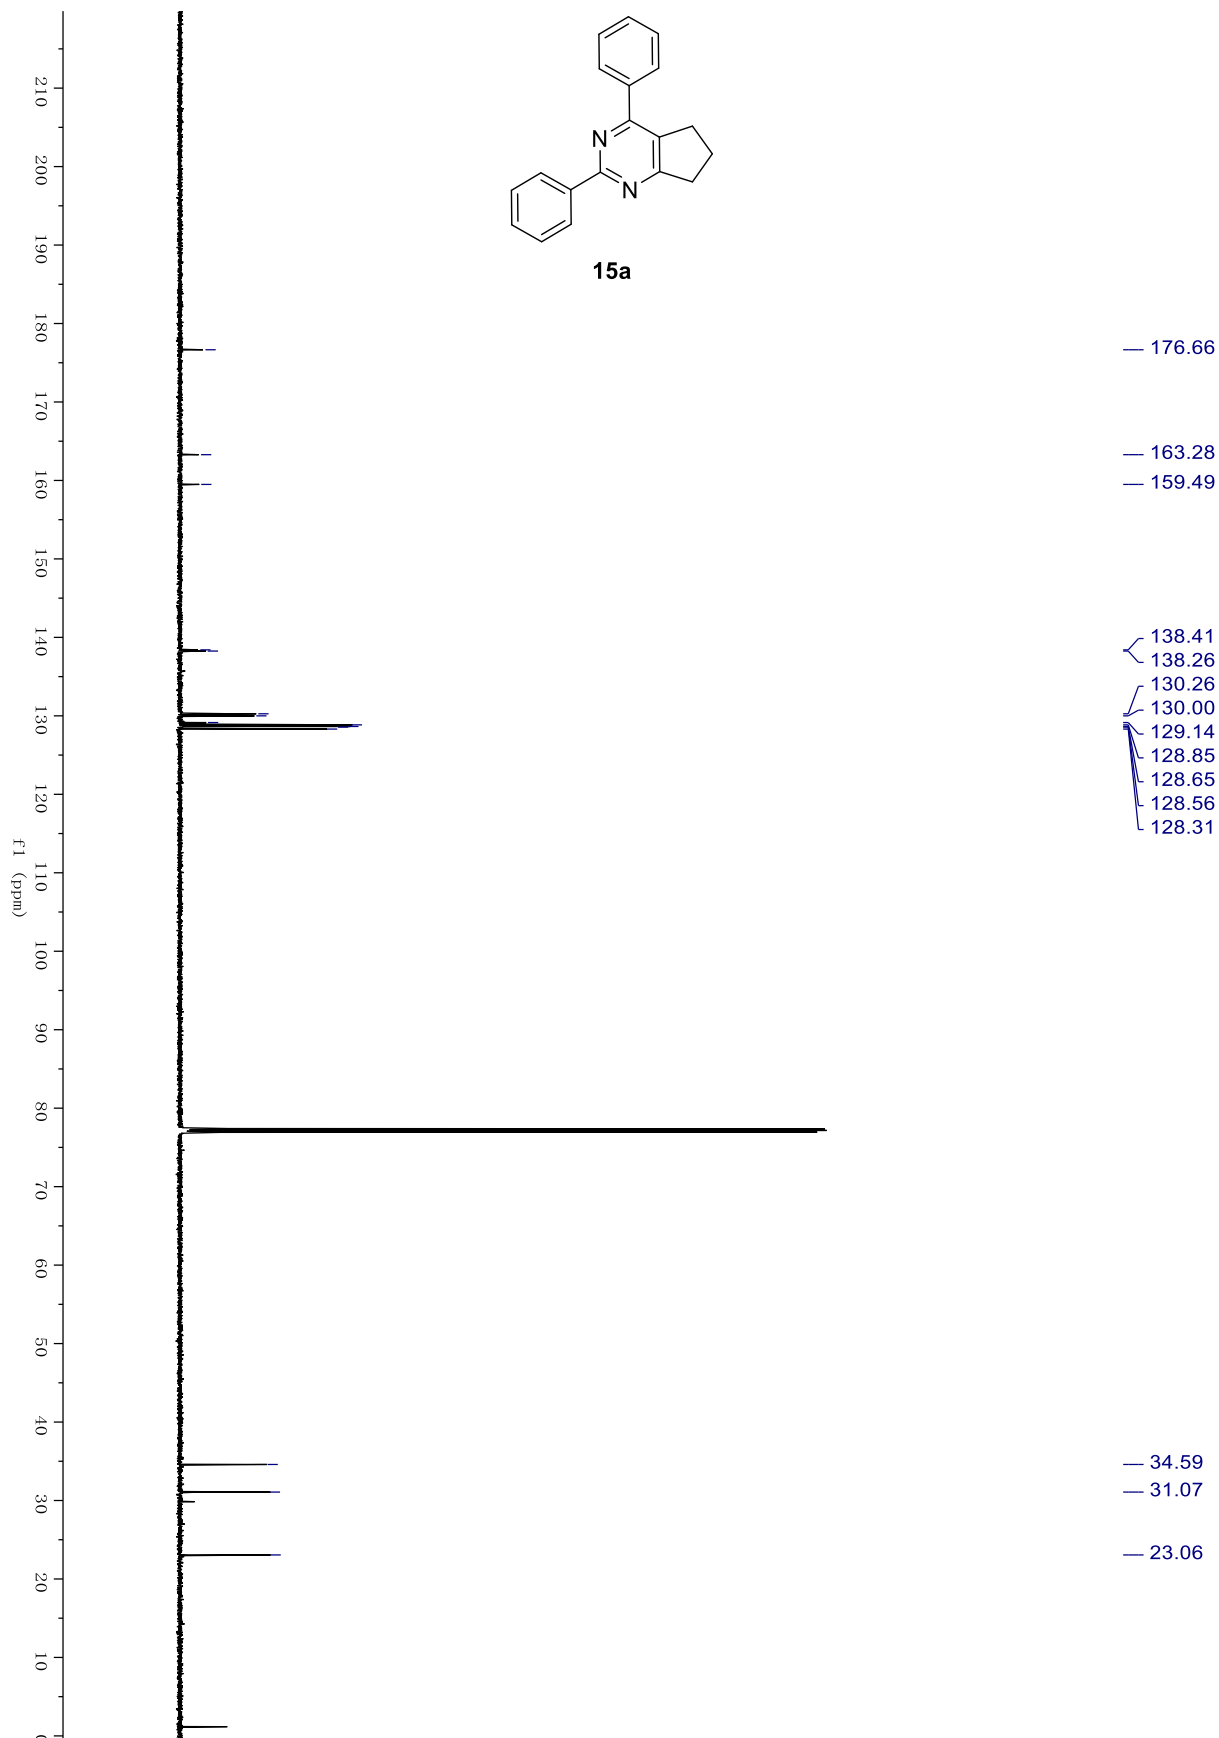



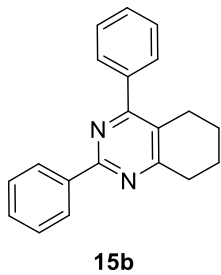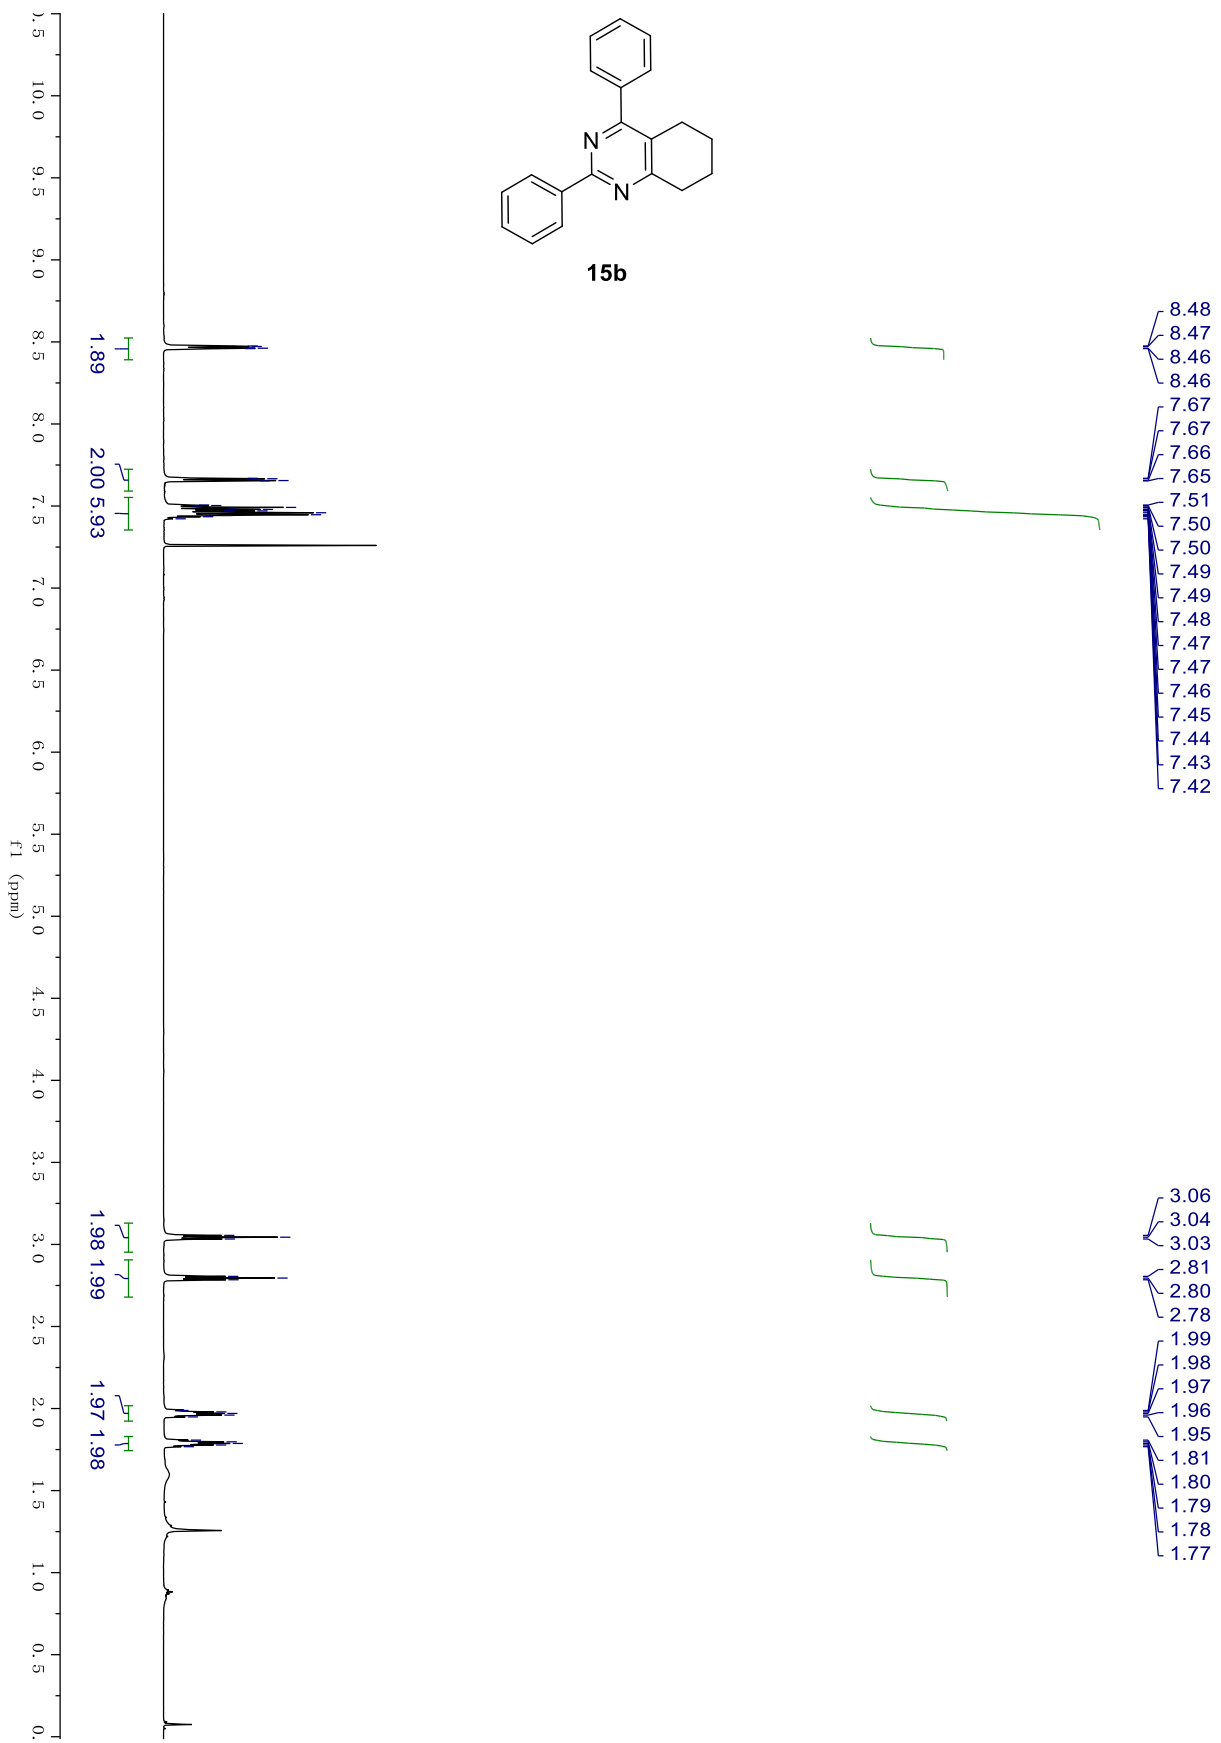

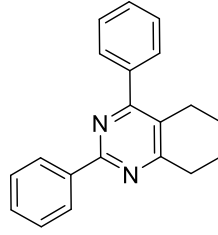

15b

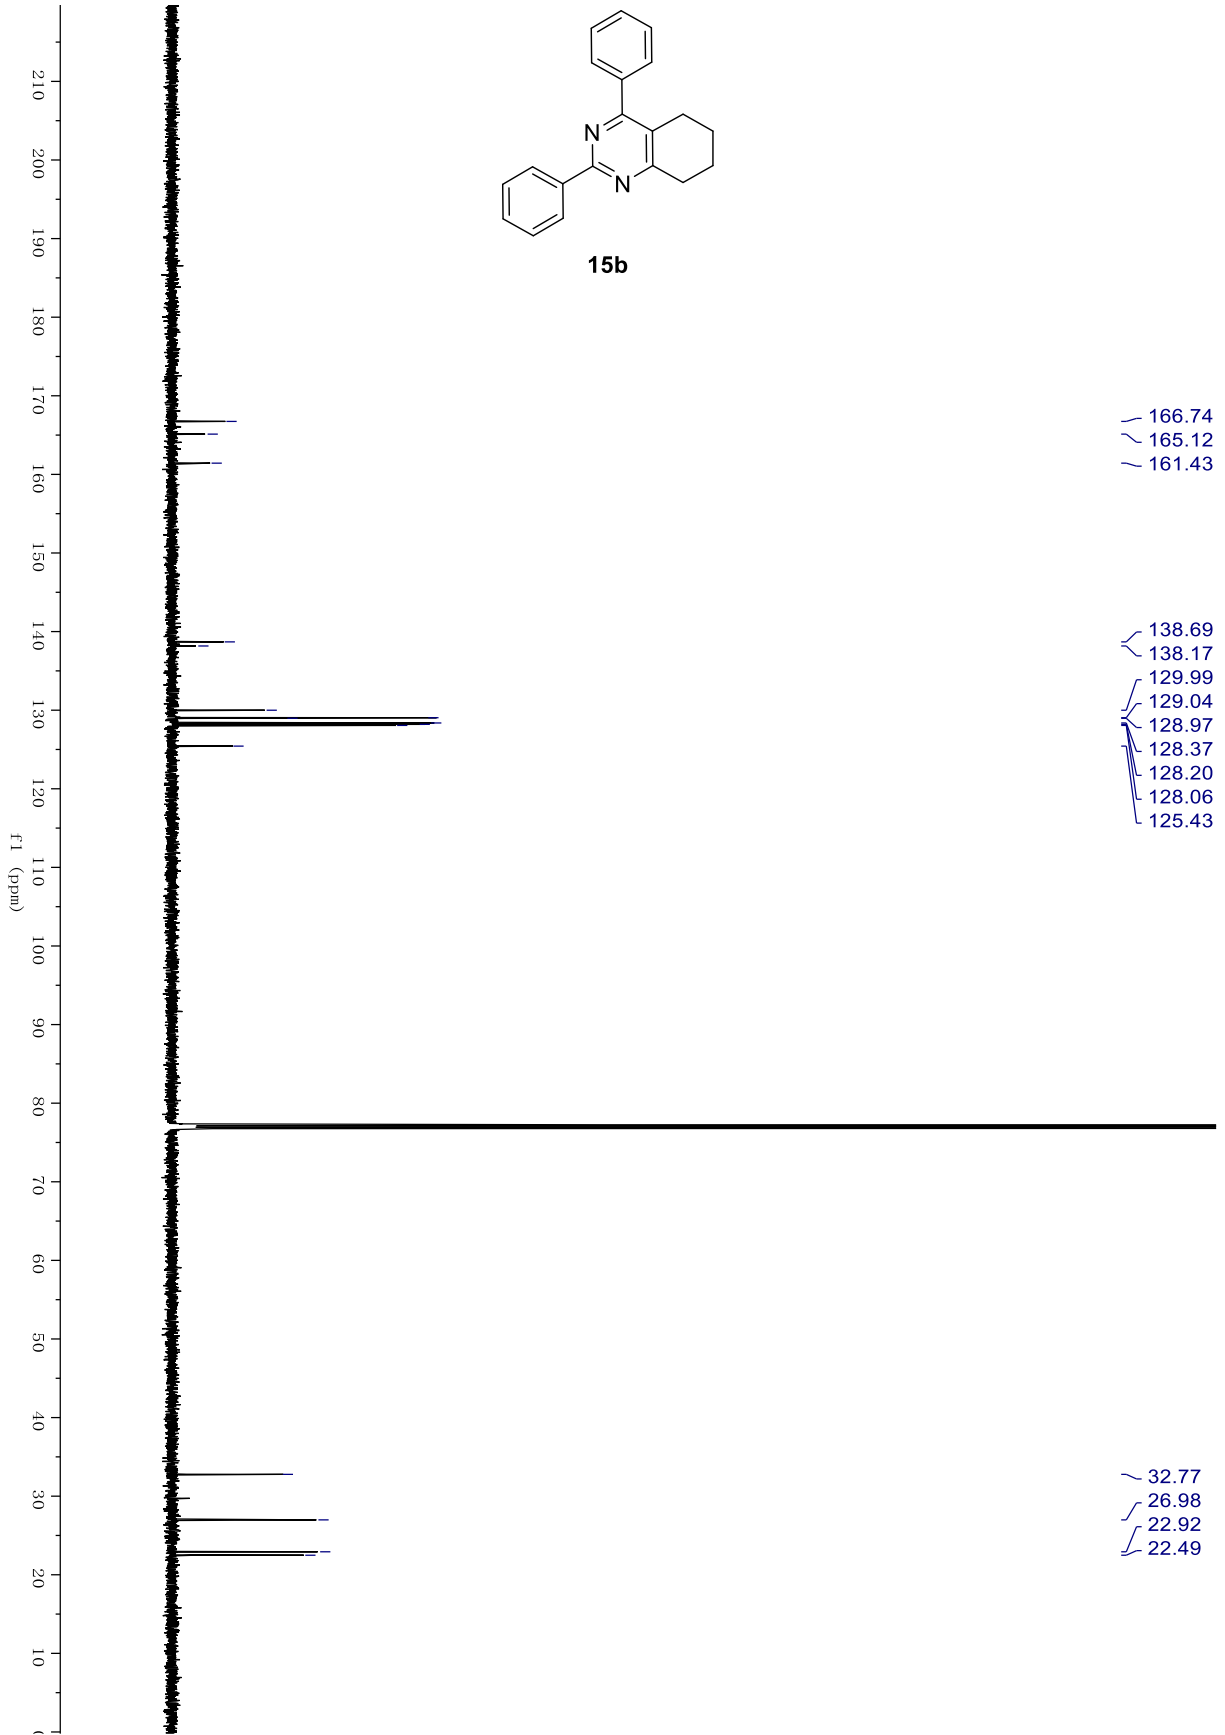

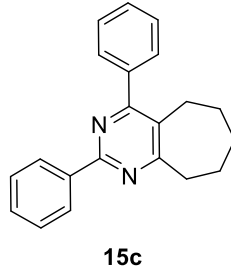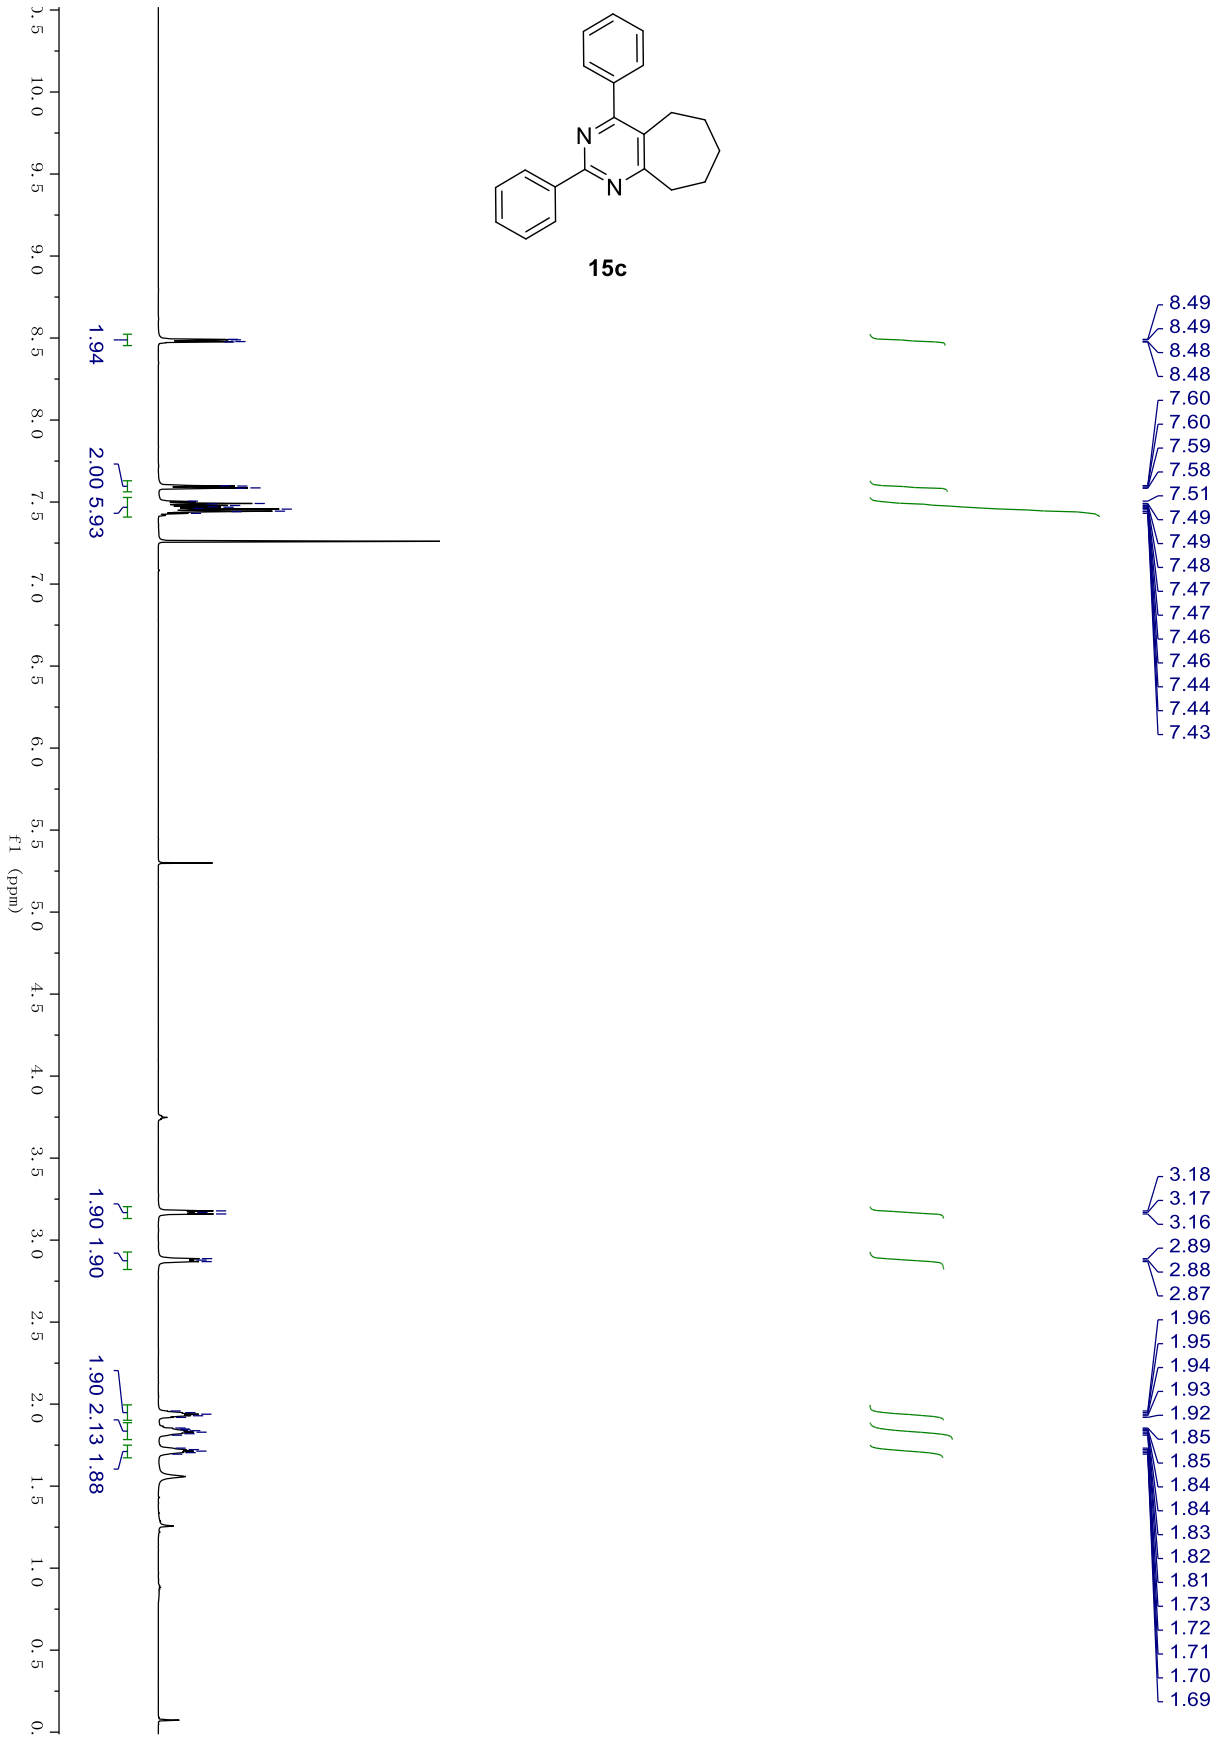

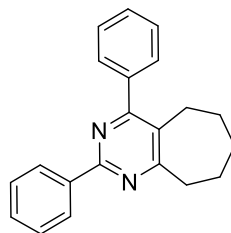

**15c**

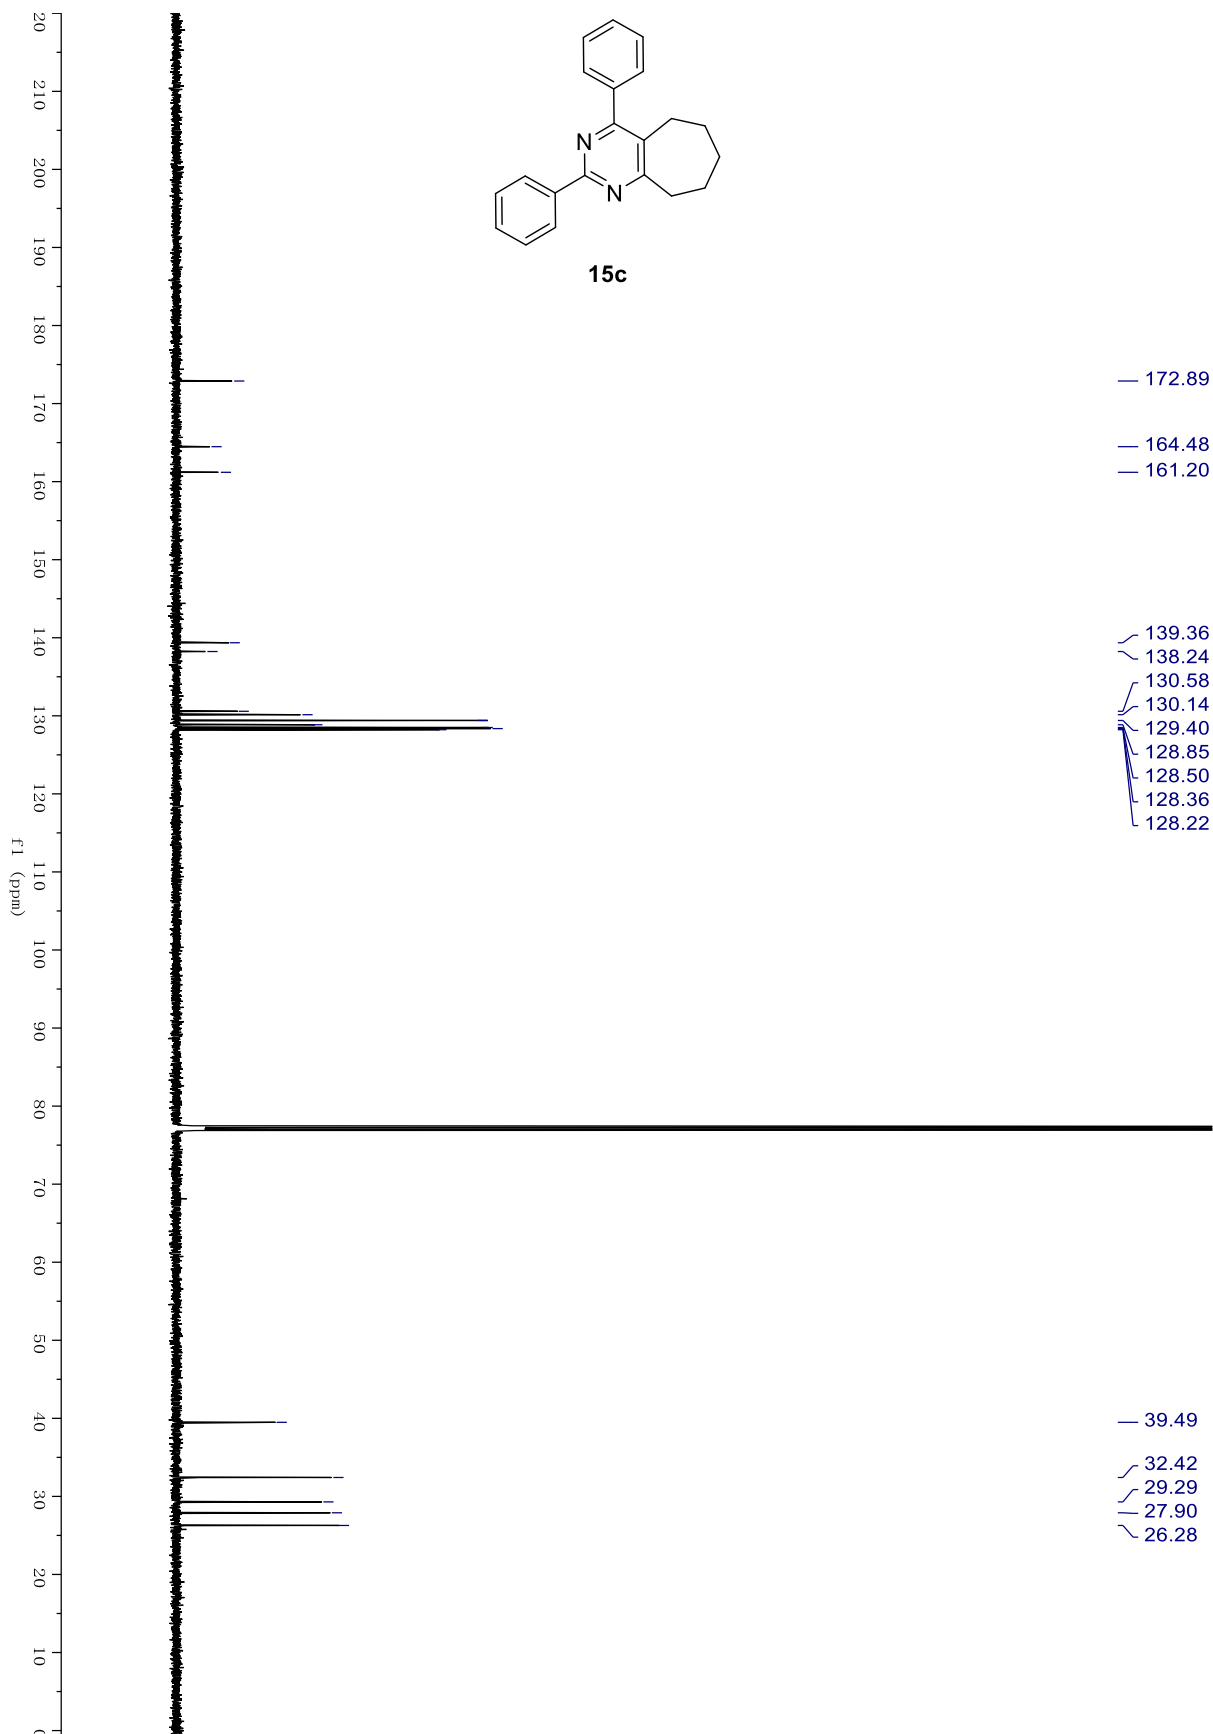

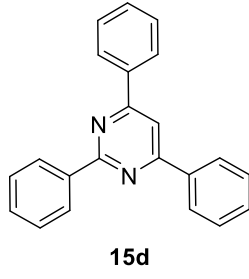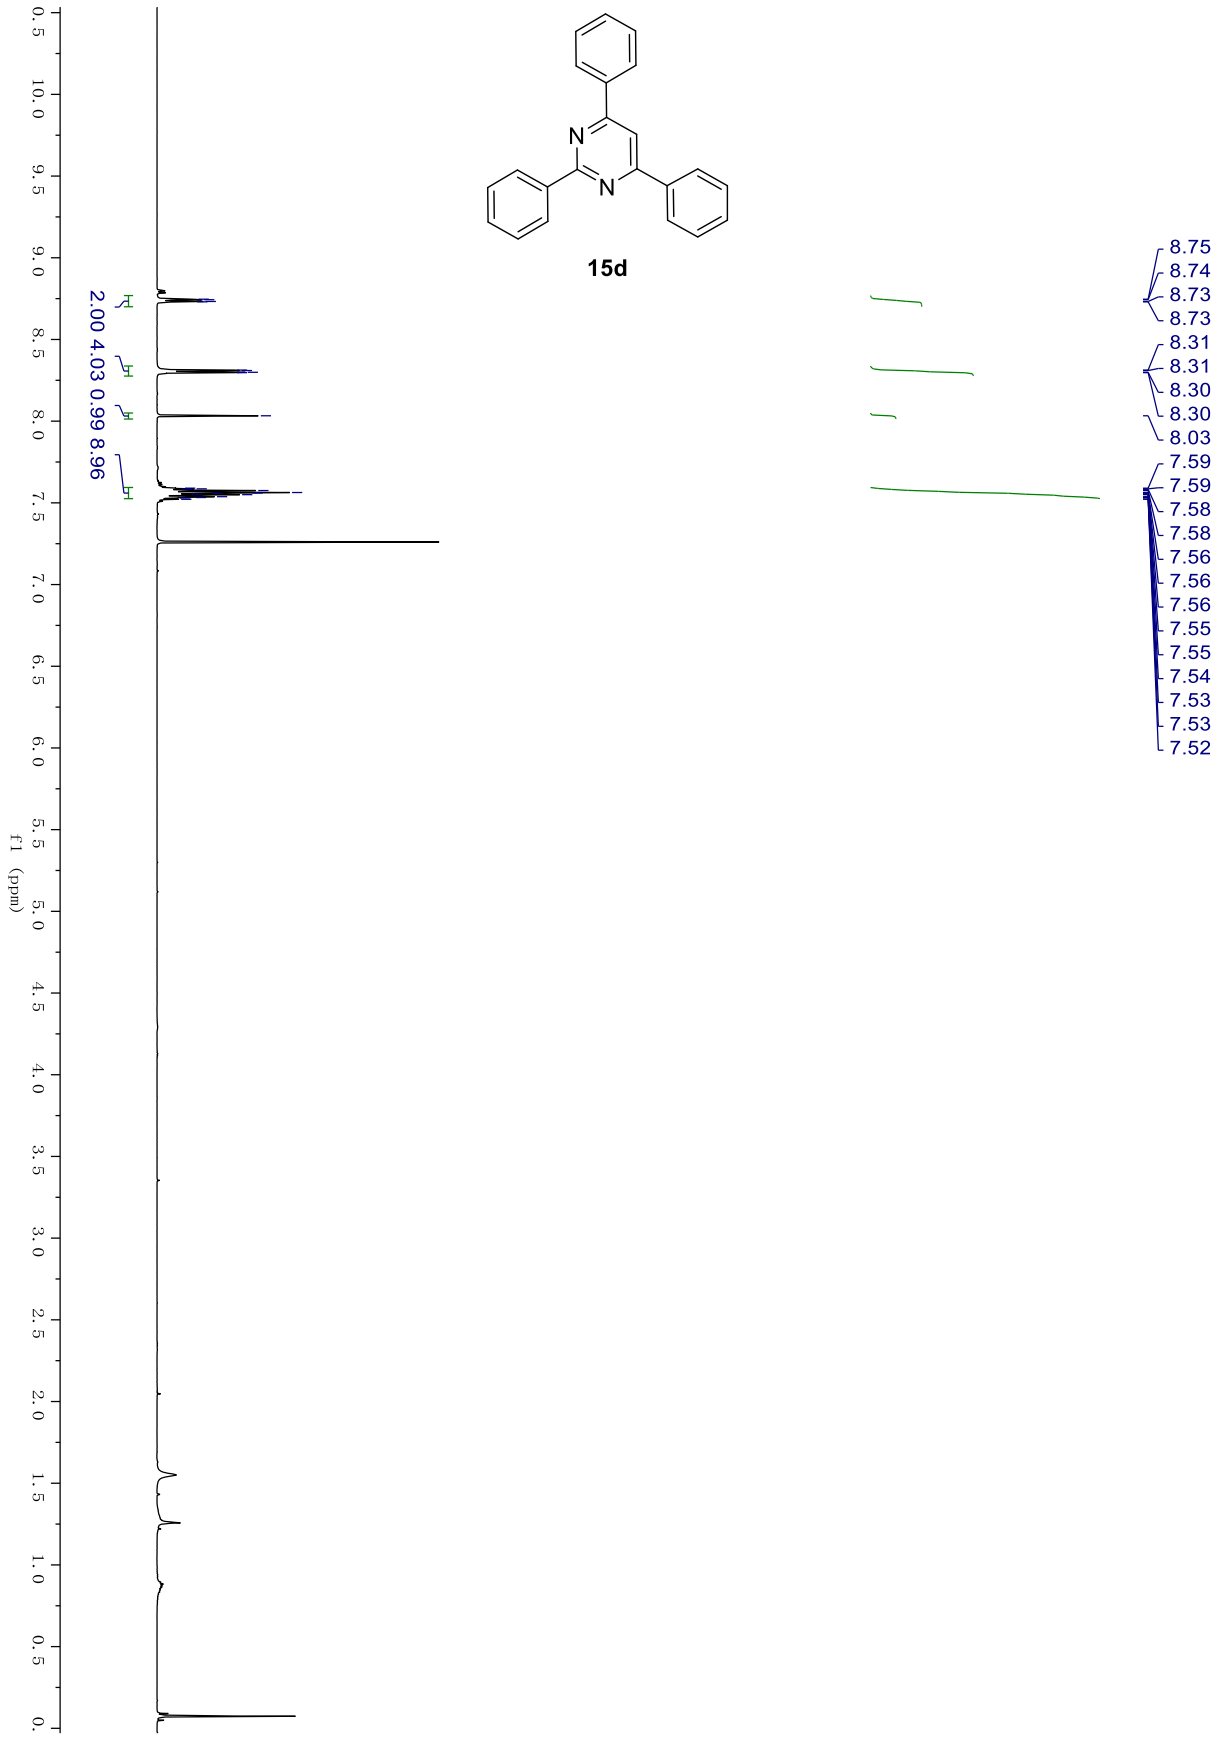

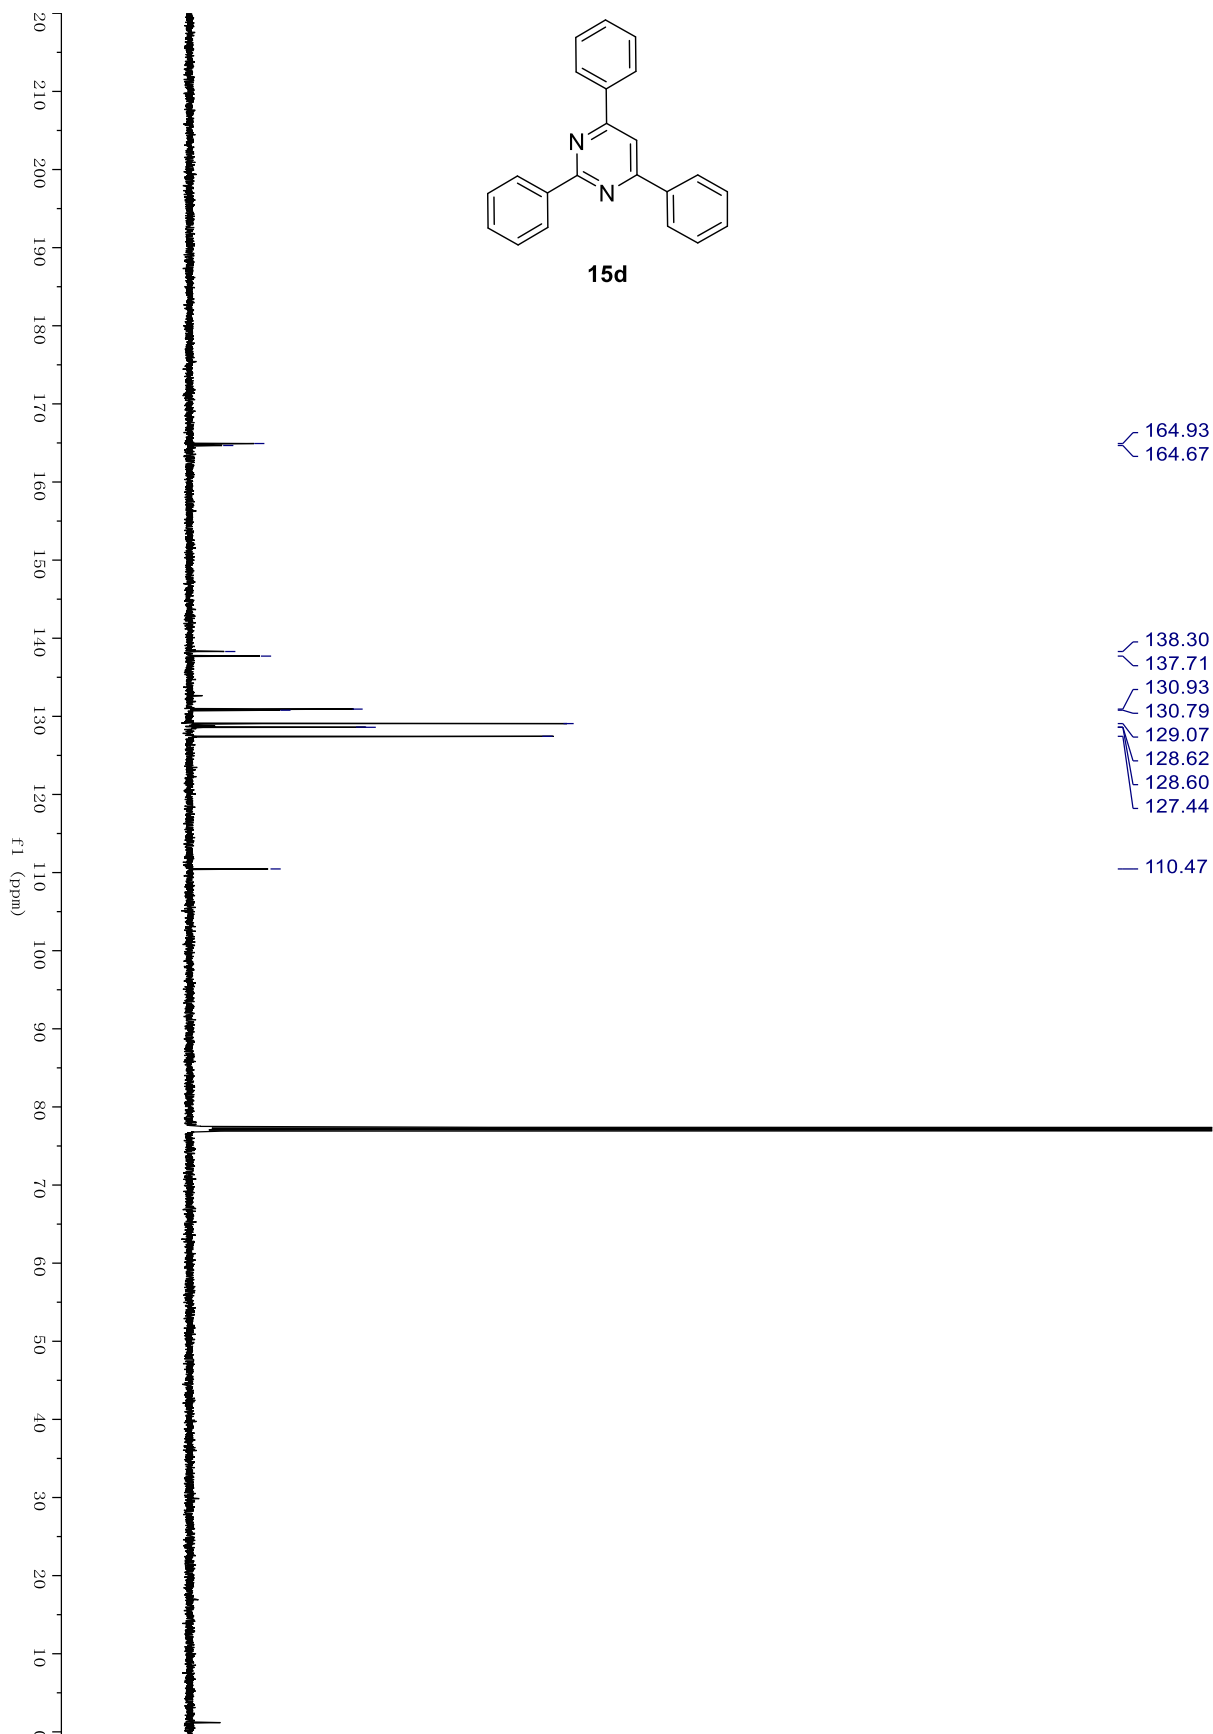

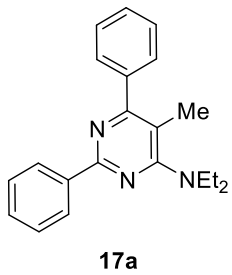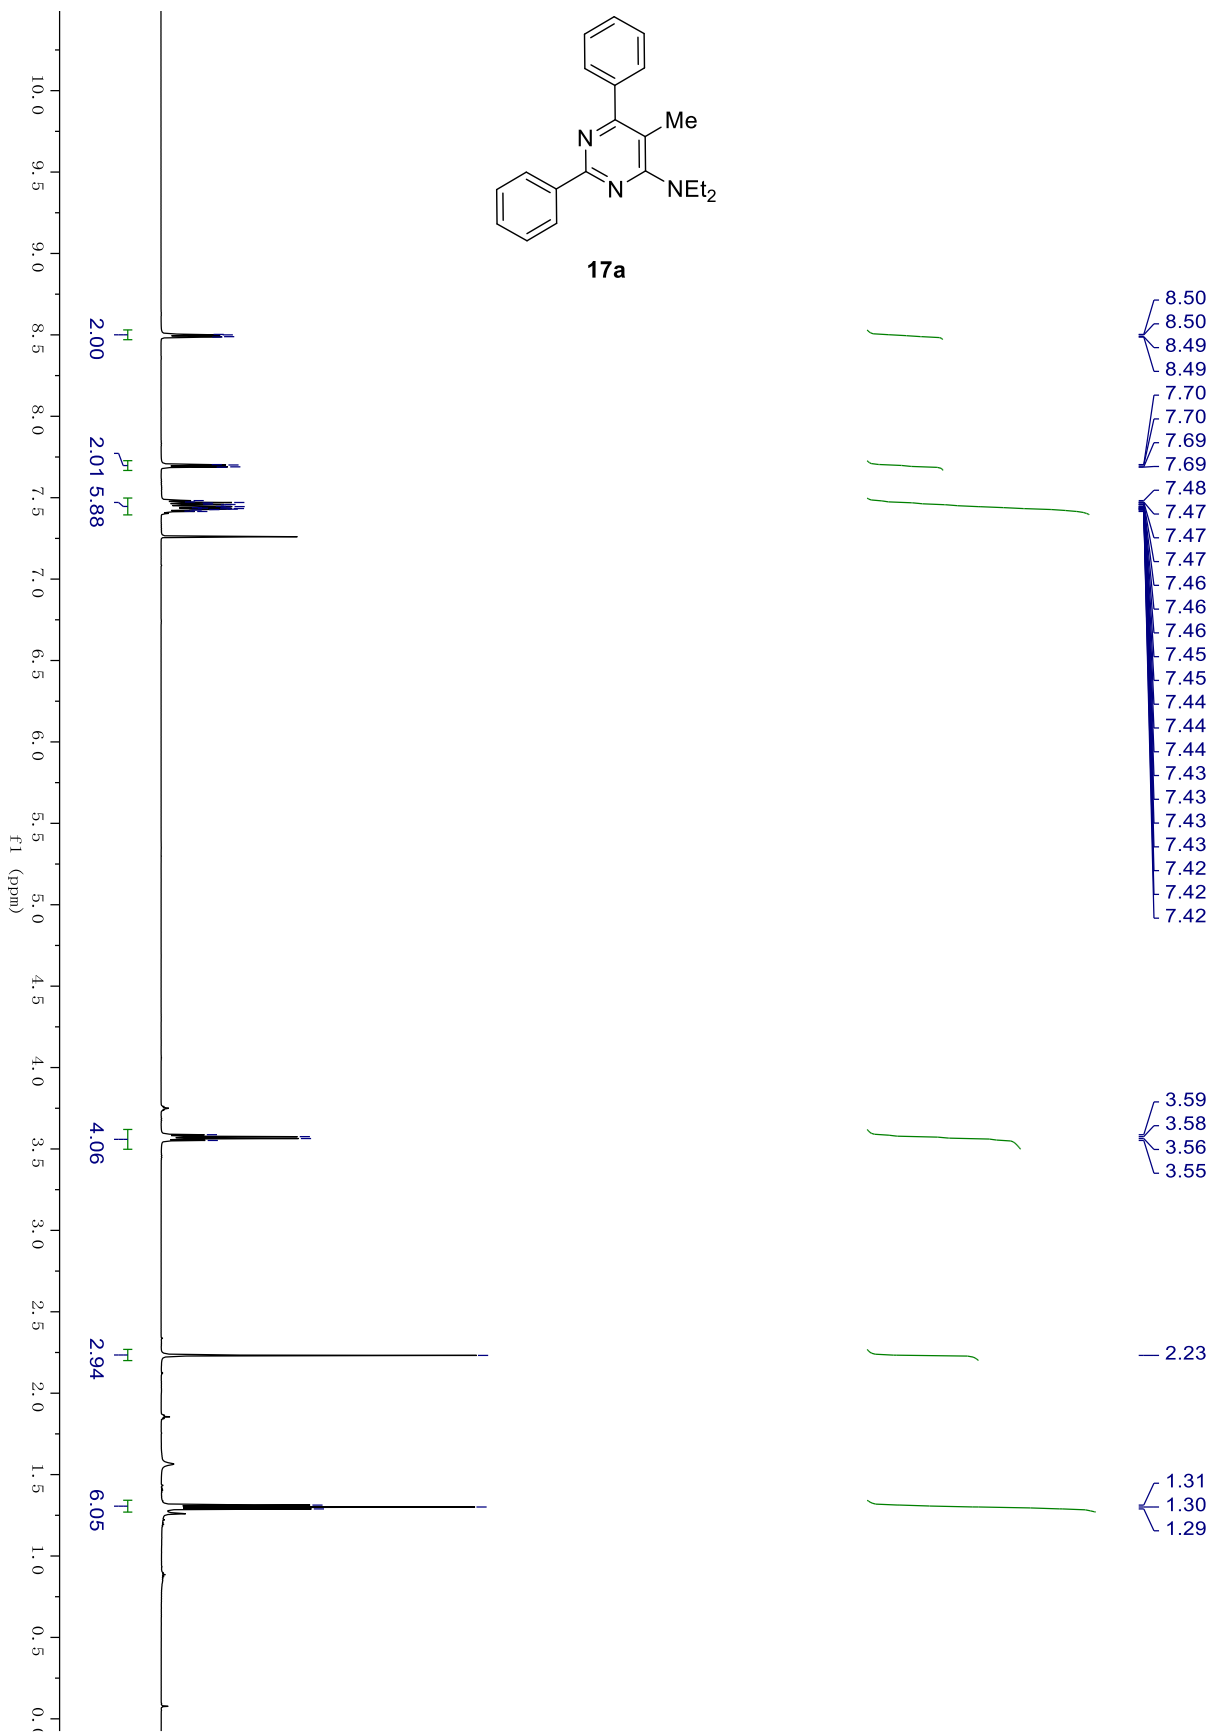

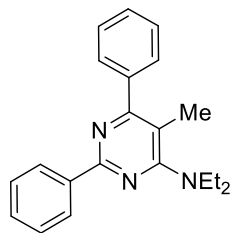

17a

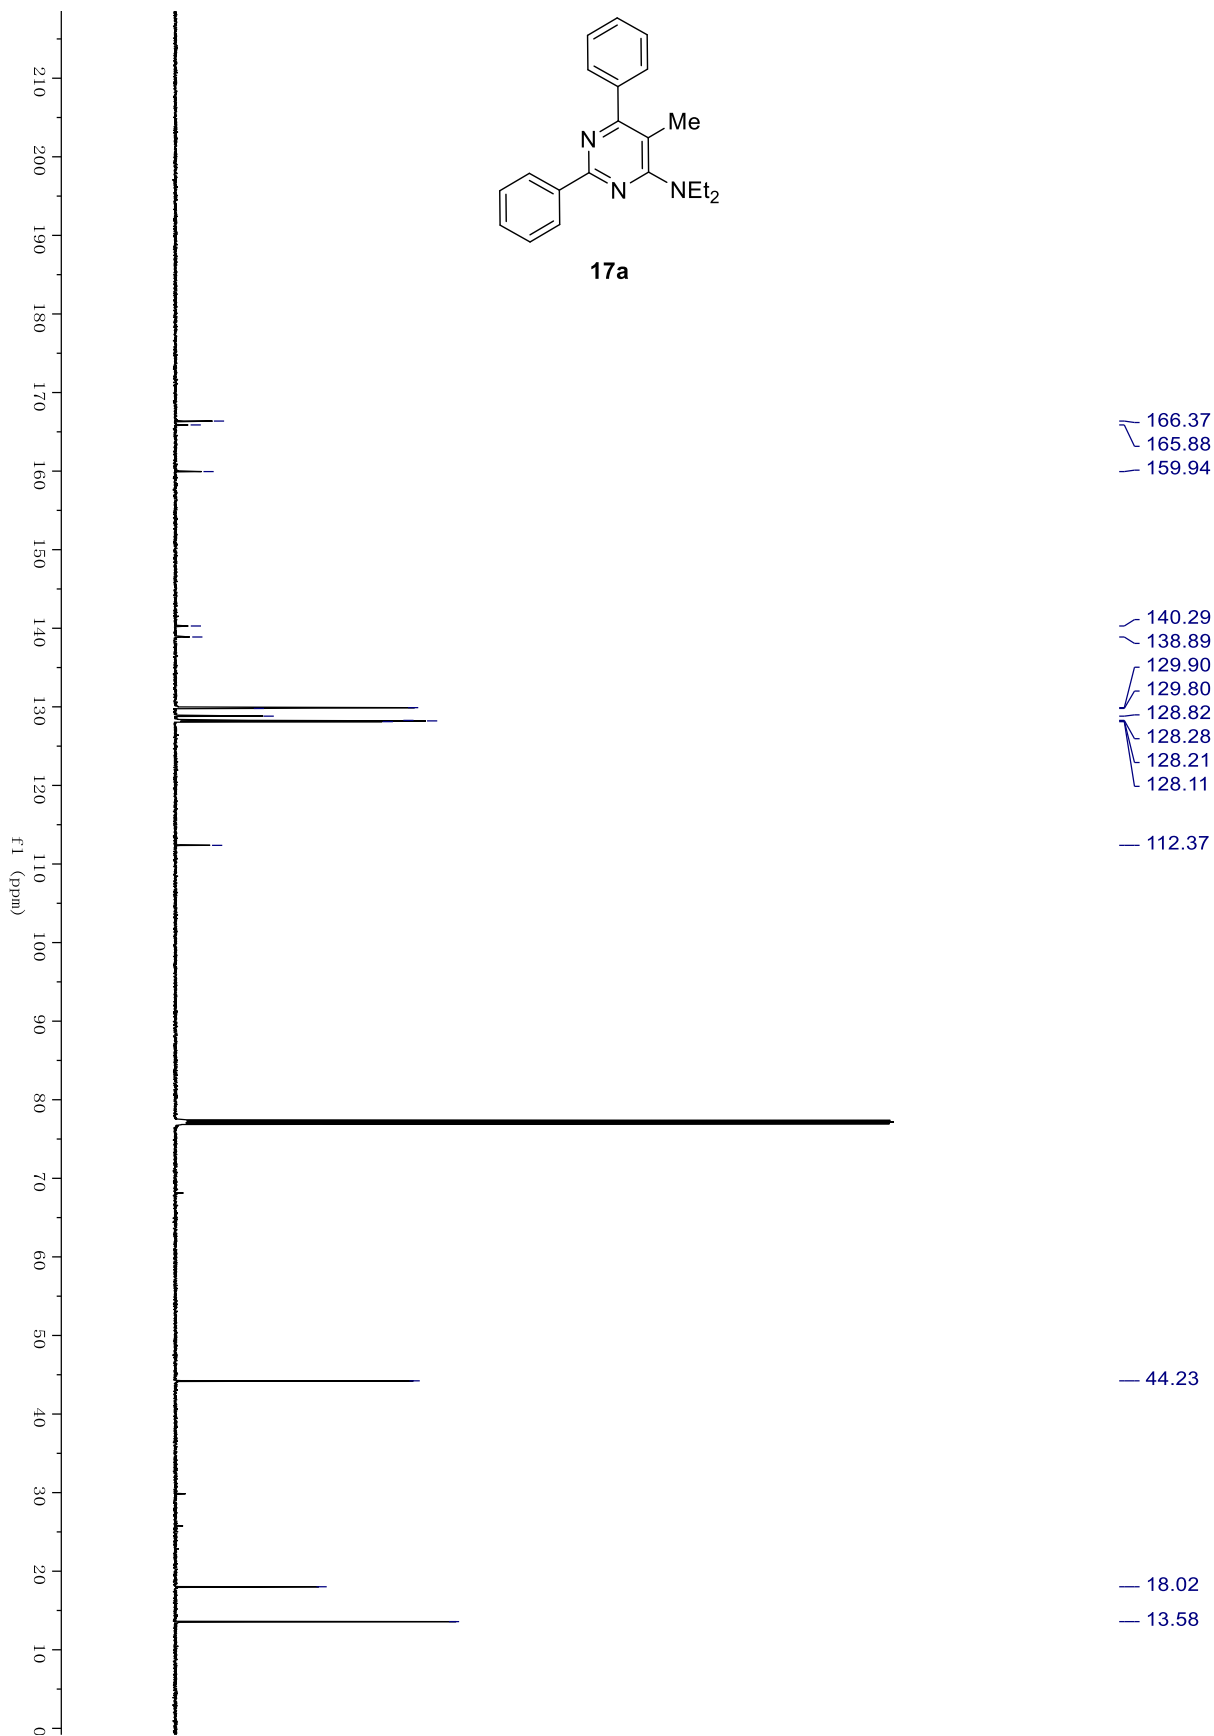



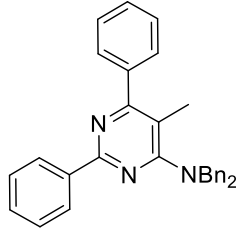

**17b**

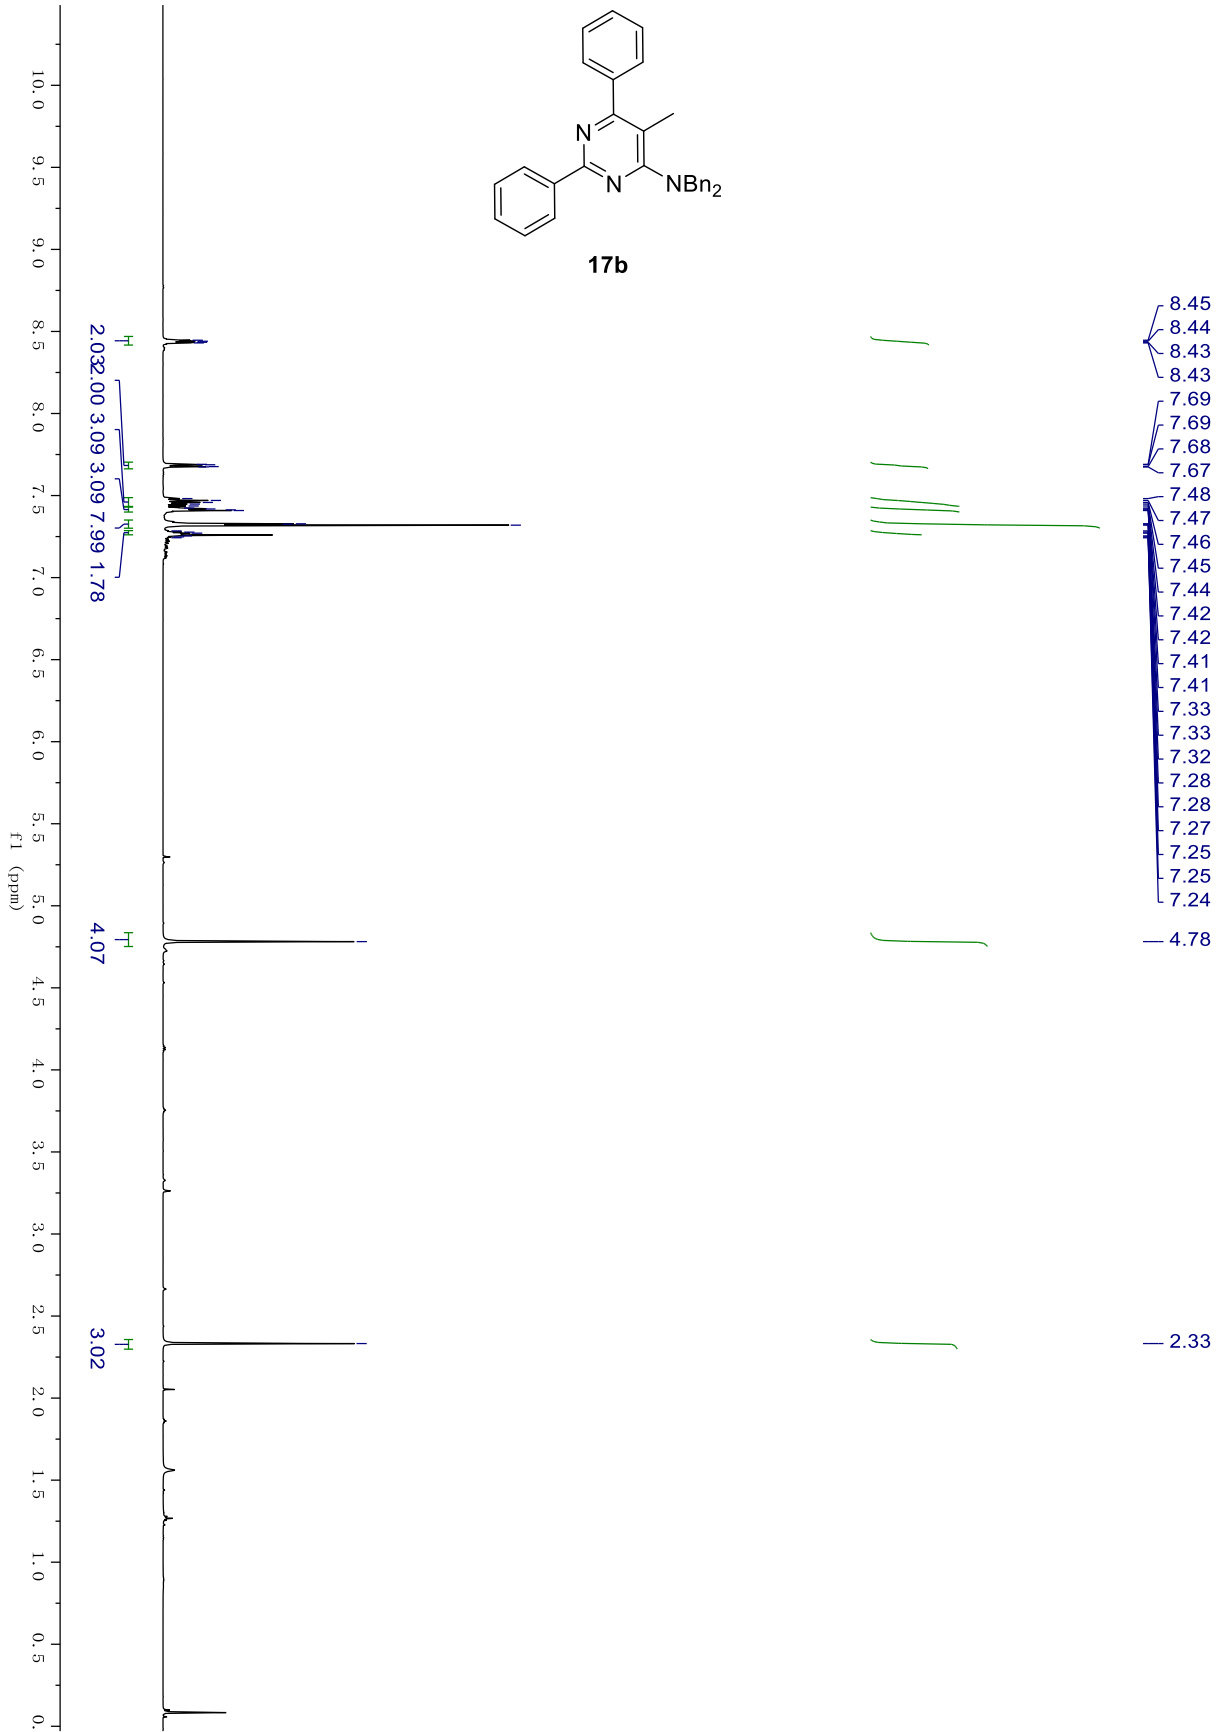

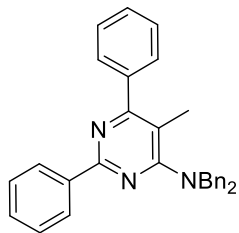

17b

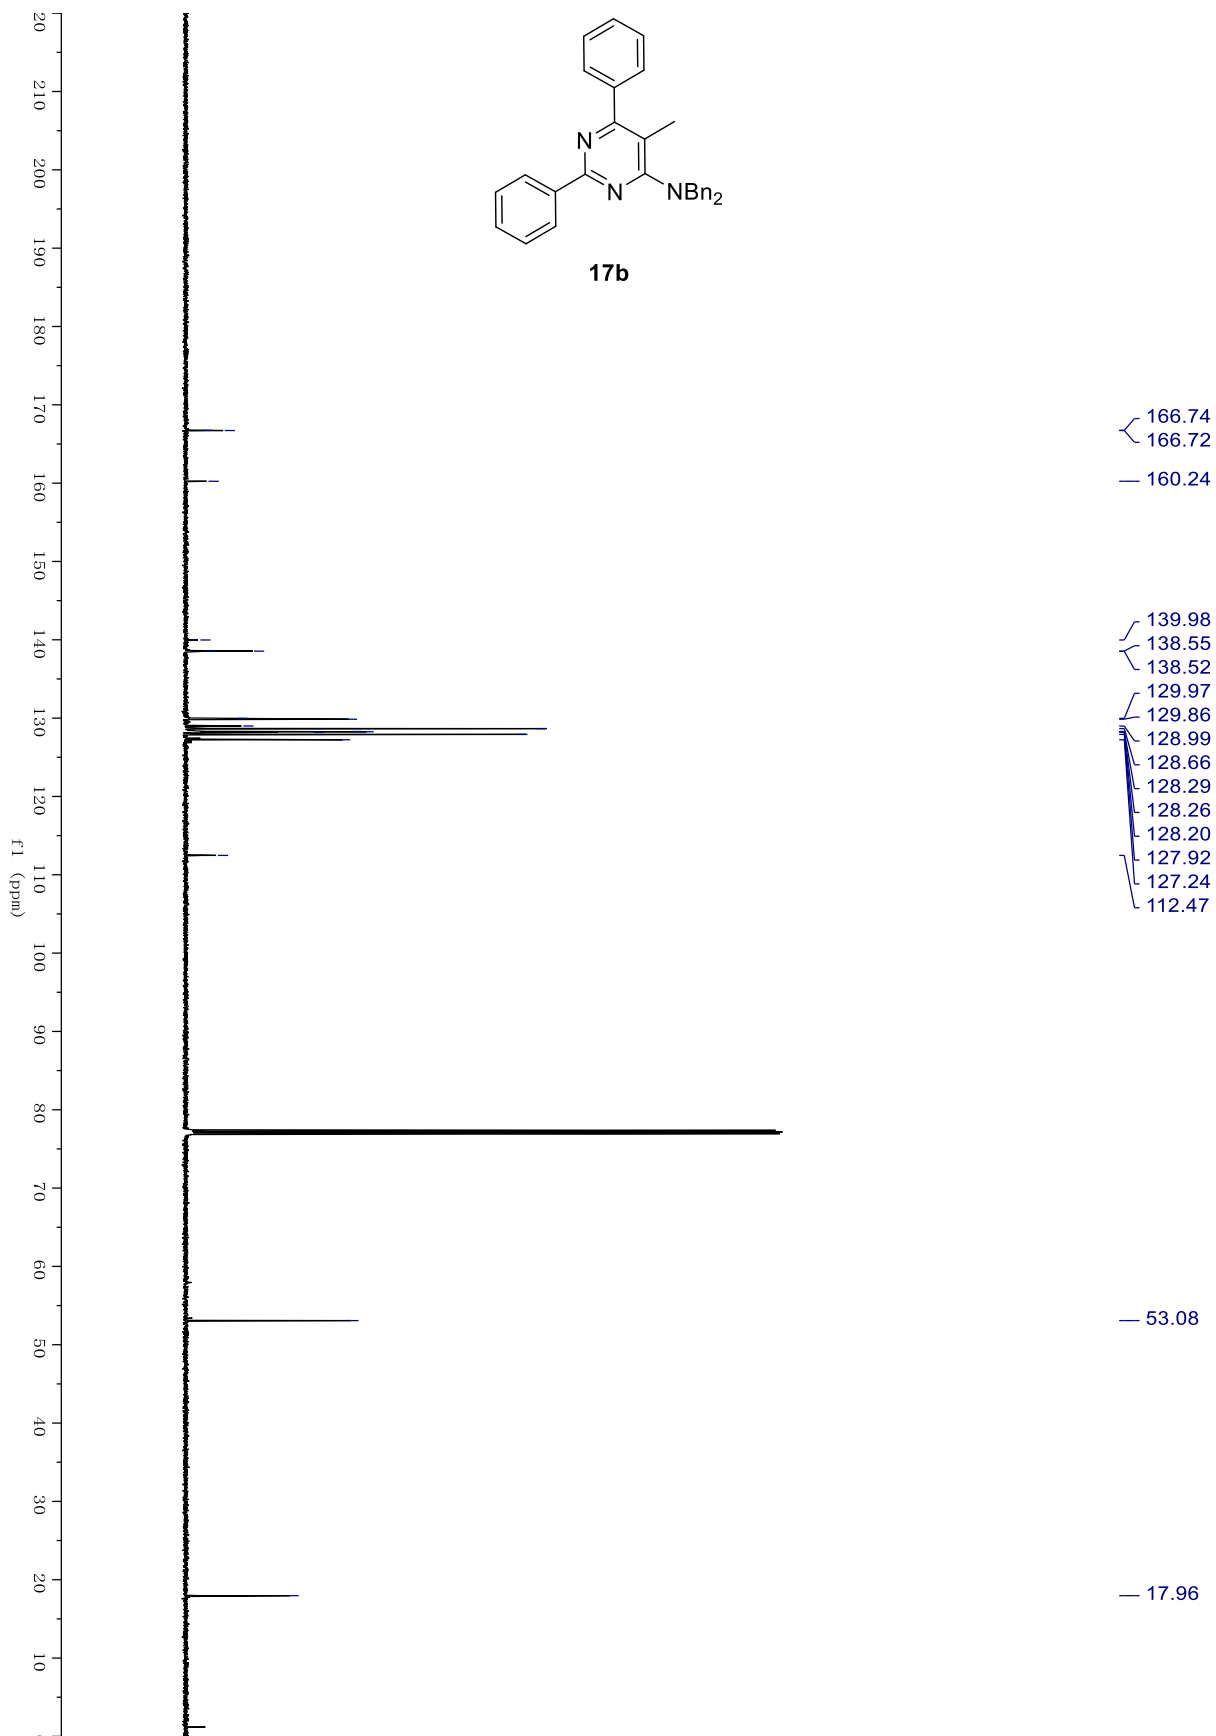

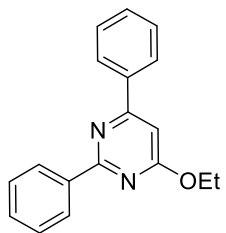

19

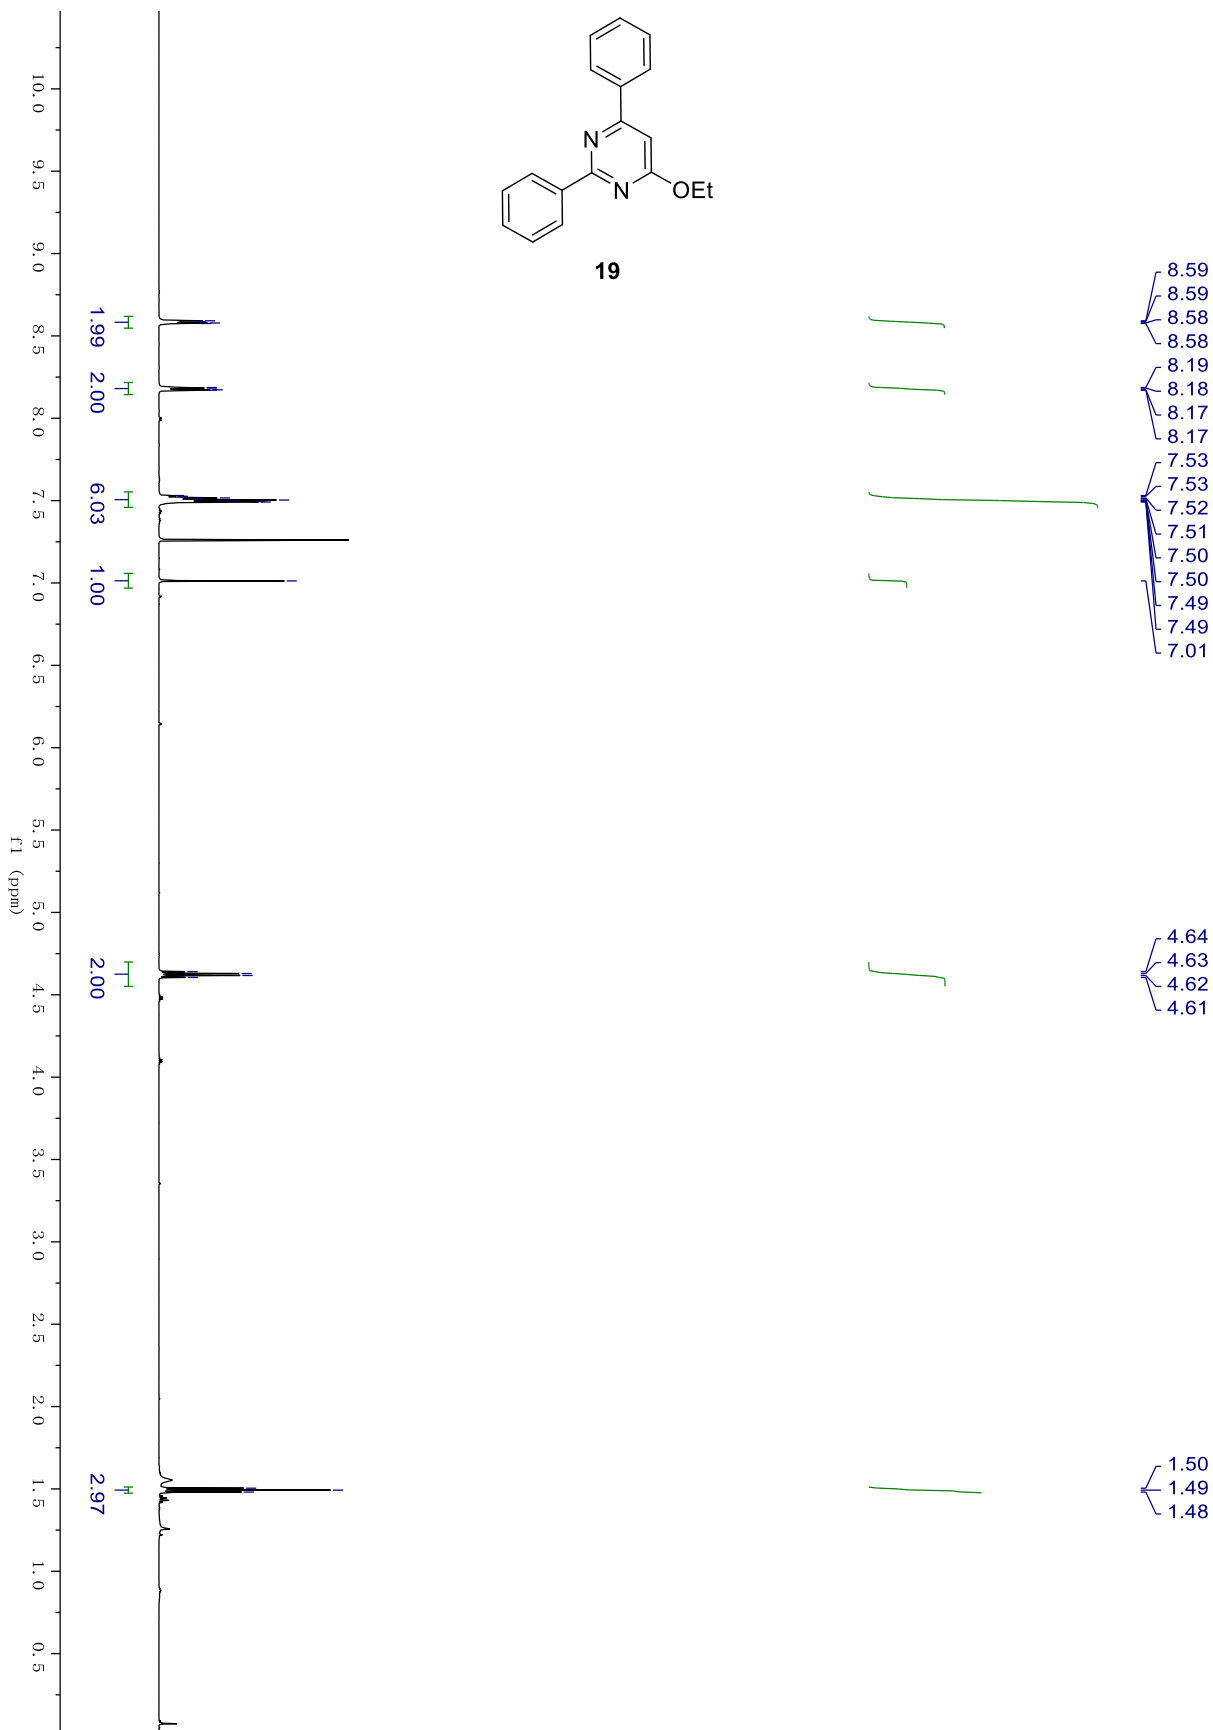



19

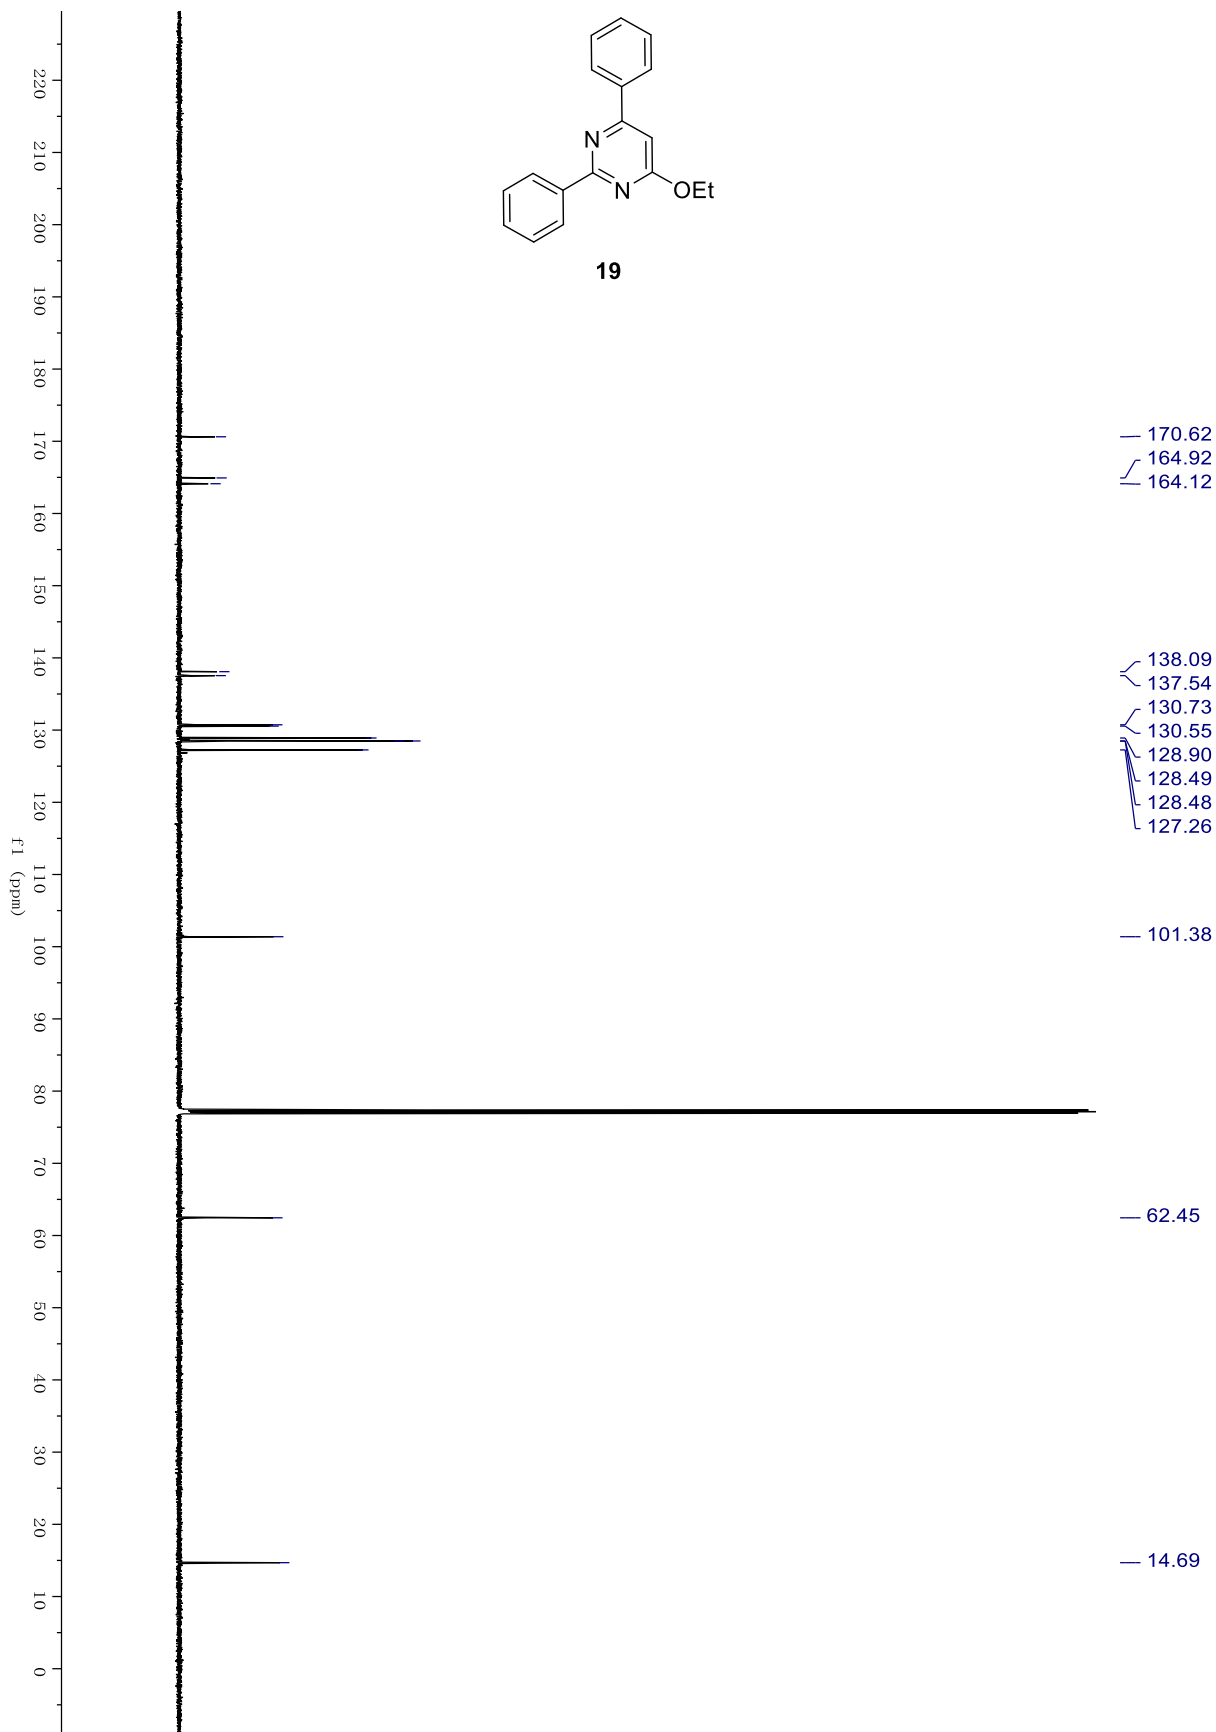

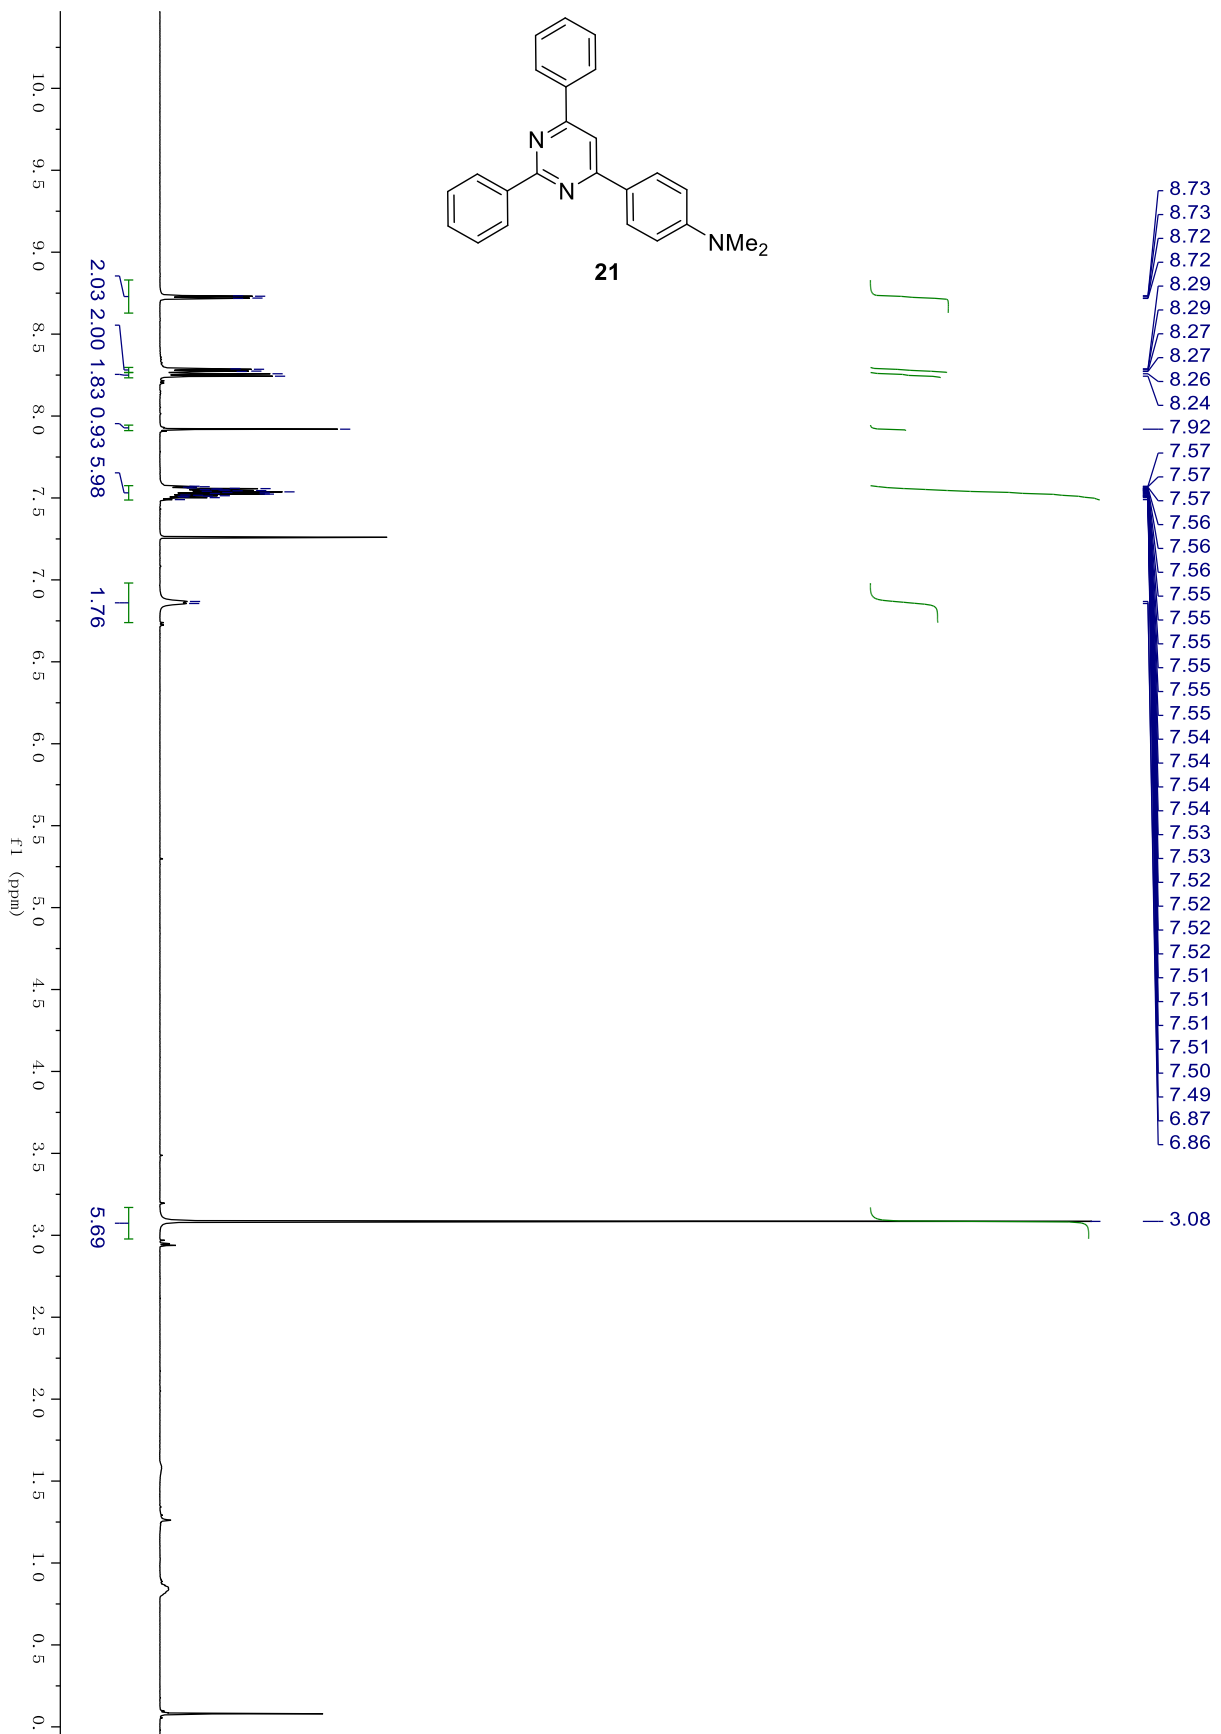

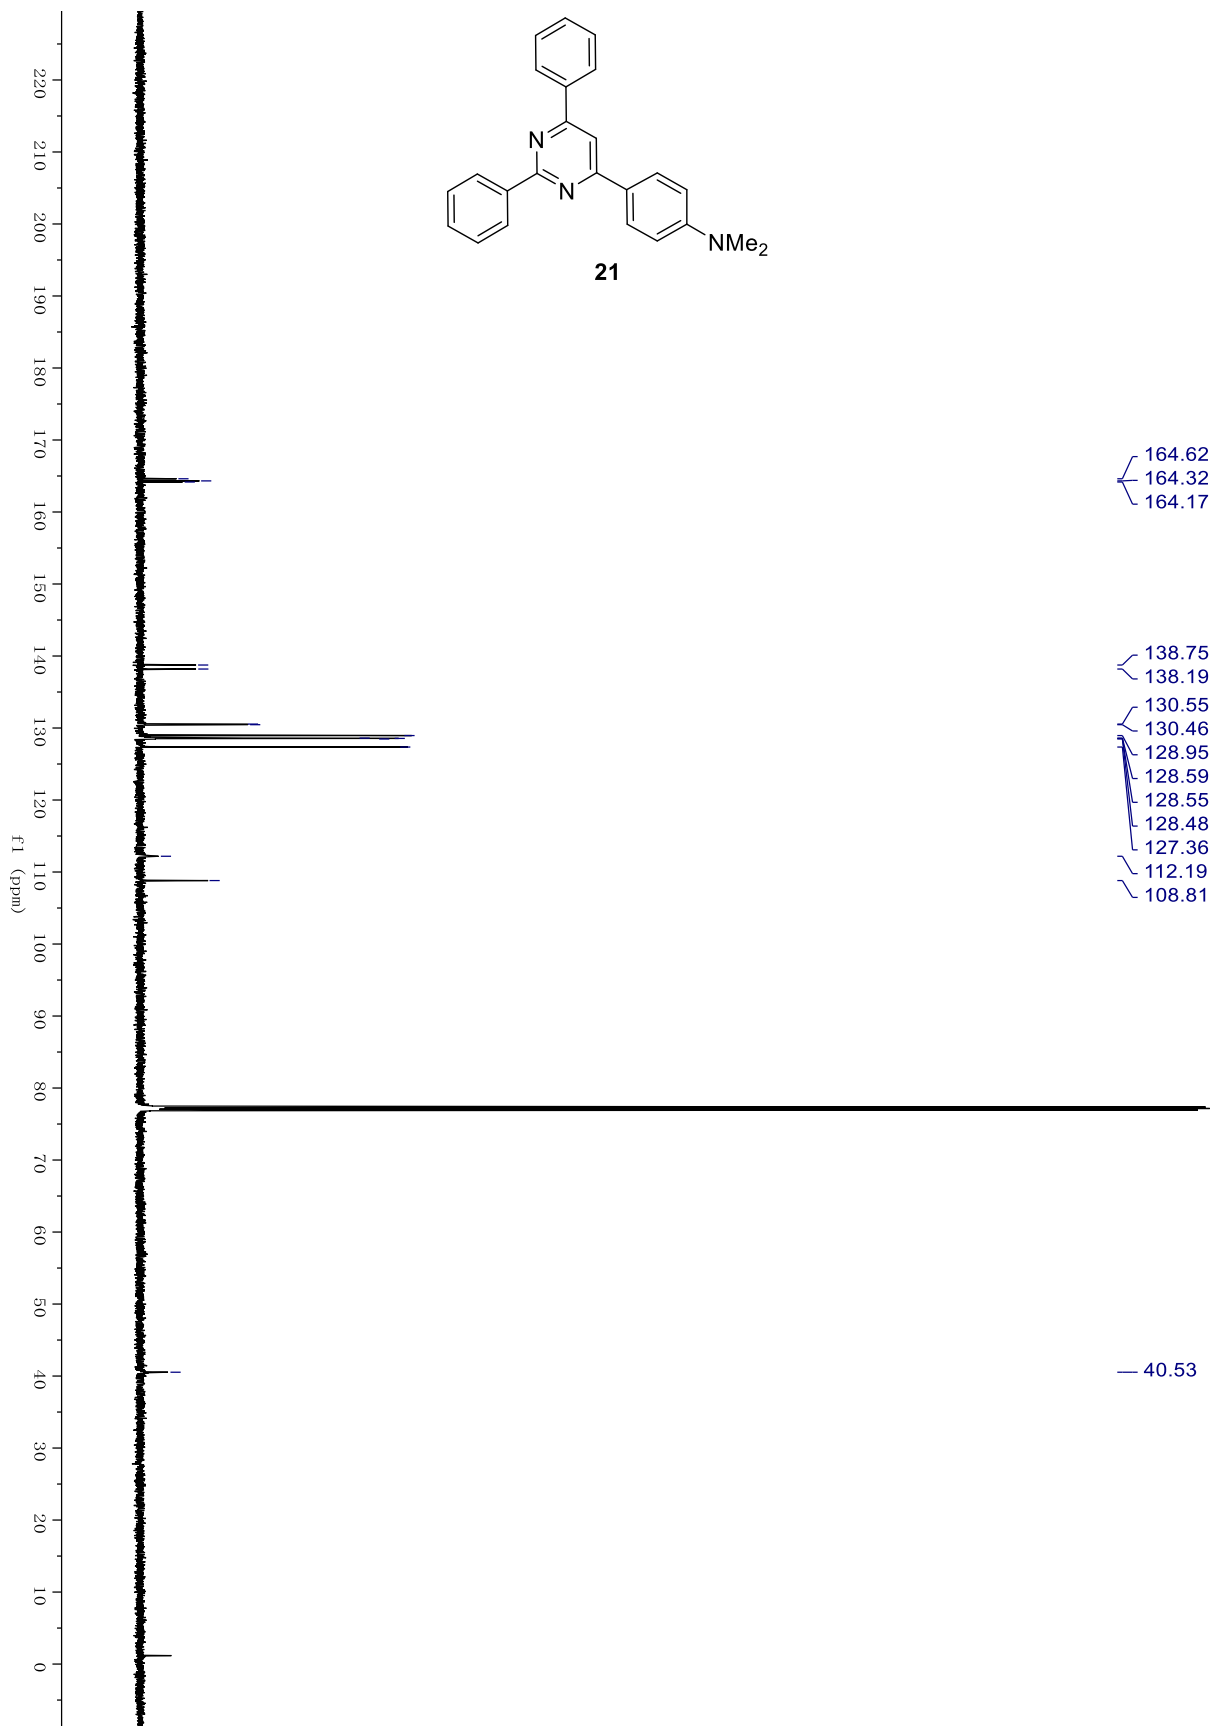

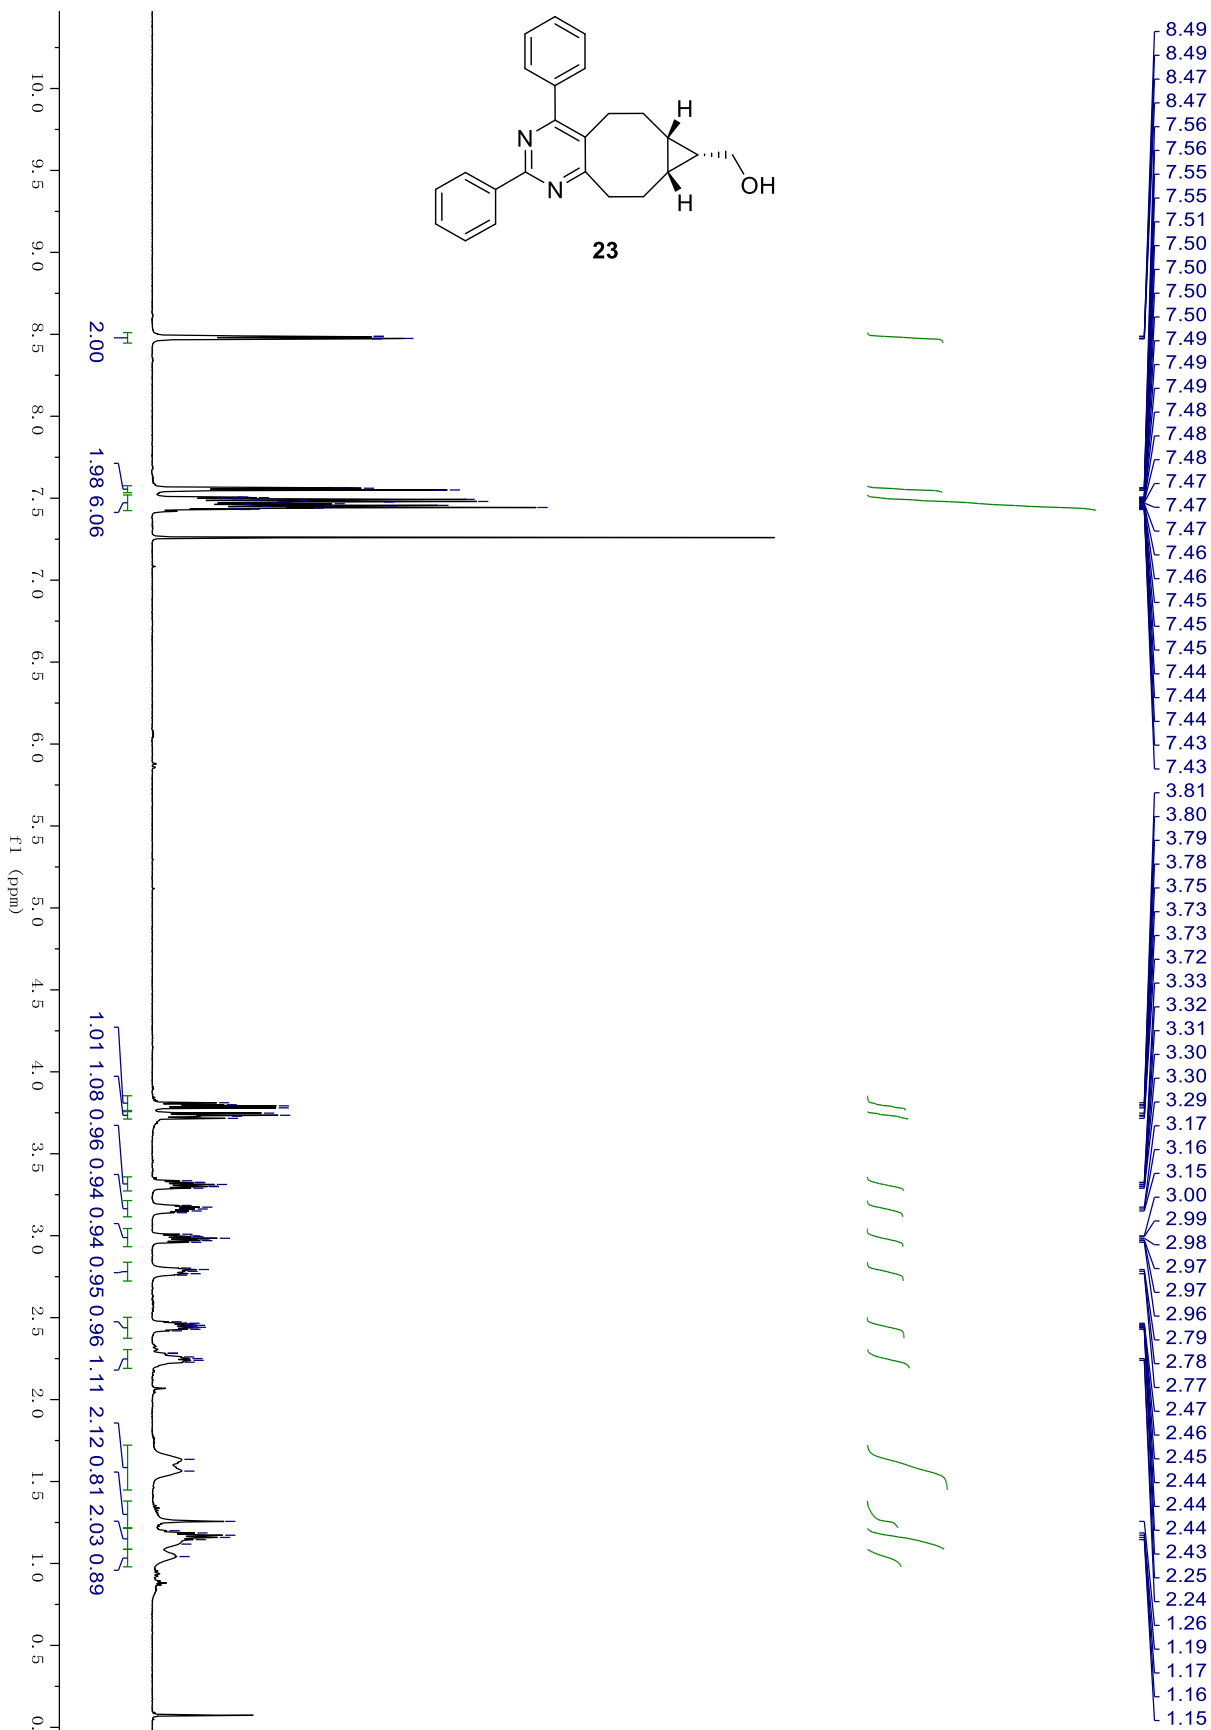

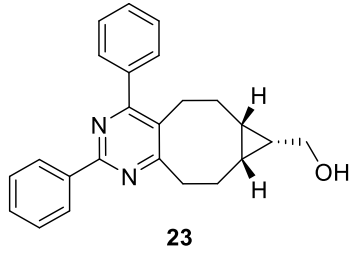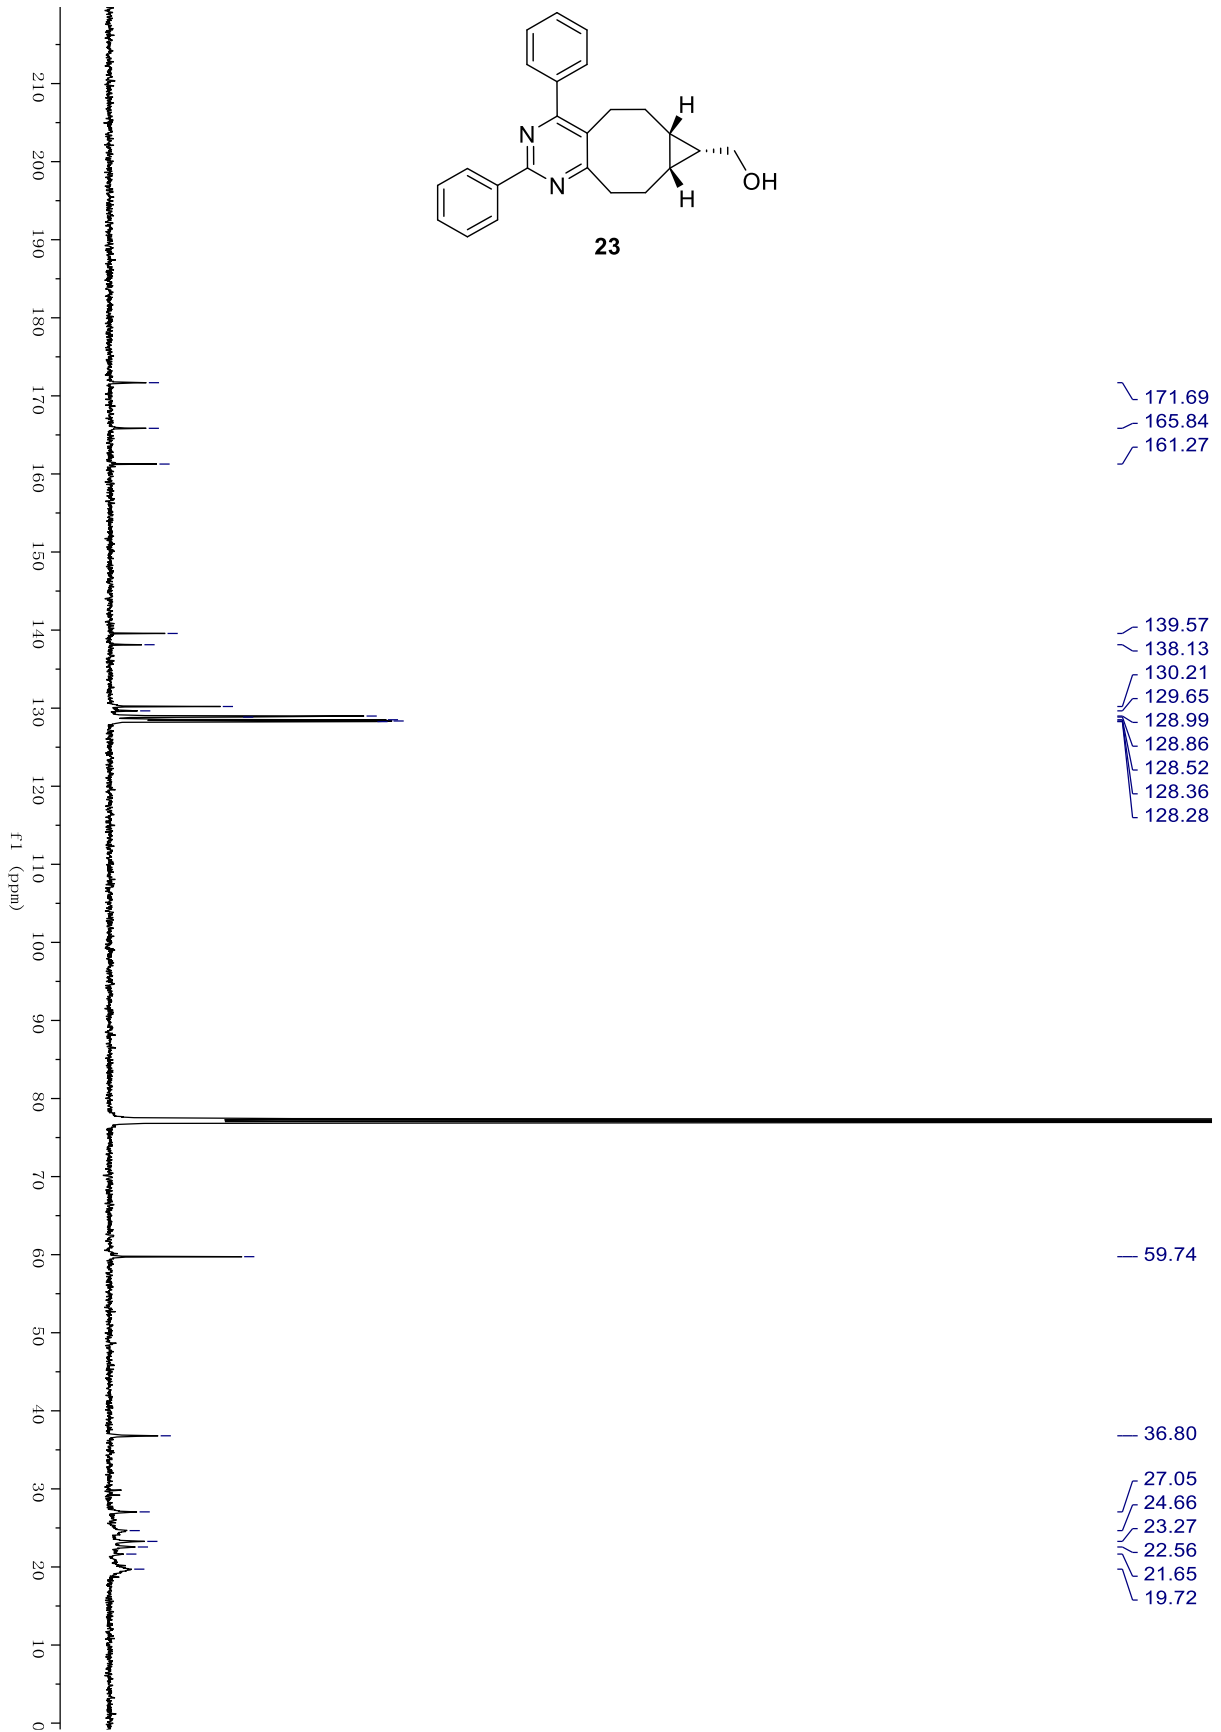



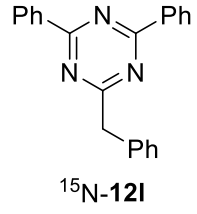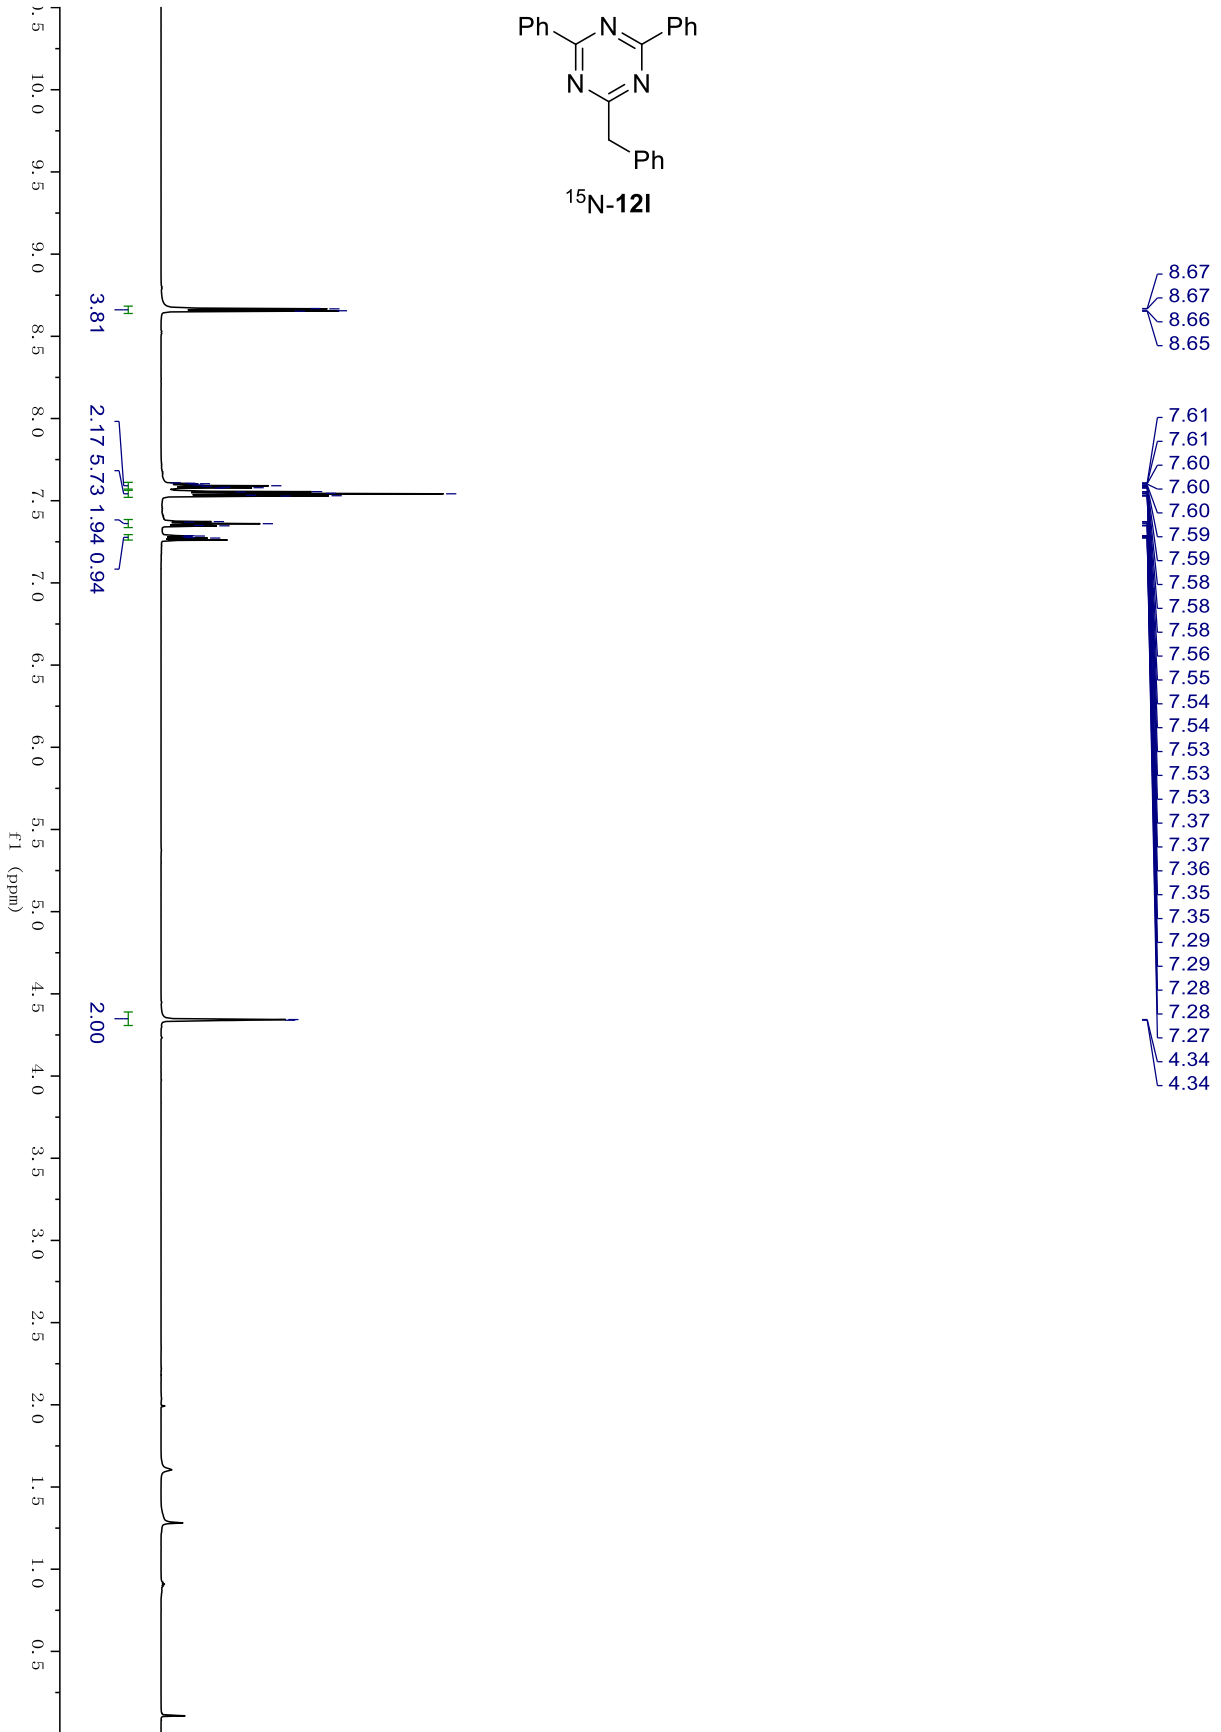

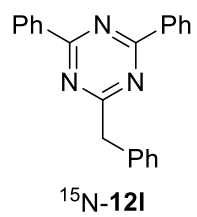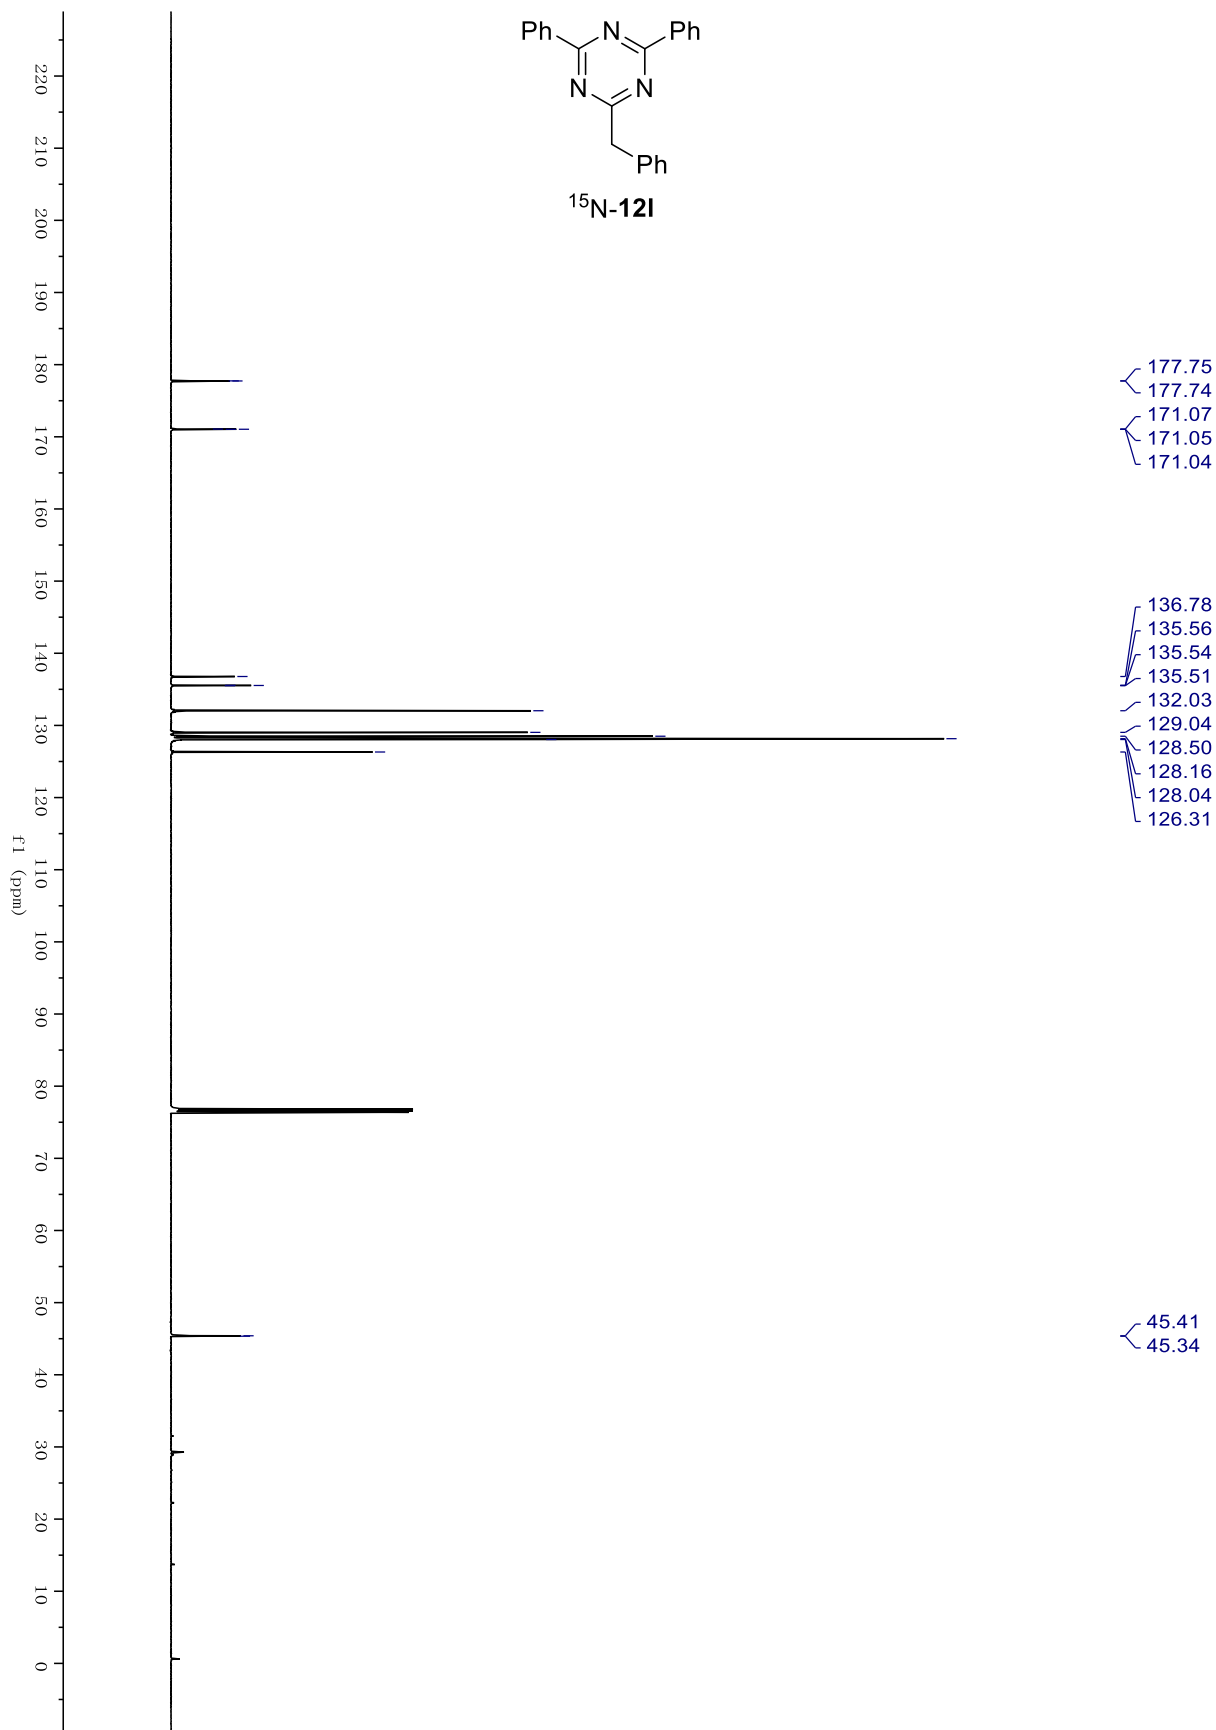

Supplement: NIHMS1051637-supplement-Supporting_Information.pdf [file NIHMS1051637-supplement-Supporting_Information.pdf]
